# Supplementary material for: Reciprocal inhibition of PIN1 and APC/CCDH1 controls timely G1/S transition and creates therapeutic vulnerability
Source: Research Square preprint supplement (doi:10.21203/rs.3.rs-2447544/v1), 2023-01-19
Supplement: Supplementary file 1 [file 7116ed053942ee3396701874.docx]

**Supplementary Data 1. The relationship between PIN1 protein expression with overall survival using the dataset by Tang et al.**

|  | Cut off: median | | Cut off: top quartile | |
| --- | --- | --- | --- | --- |
|  | HR (95% CI) | *p* | HR (95% CI) | *p* |
| Model 0 | 2.67 (1.28-5.57) | 0.009 | 4.56 (1.90-10.95) | <0.001 |
| Model 1: adjusting for age | 2.47 (1.18-5.17) | 0.016 | 4.74 (1.97-11.45) | <0.001 |
| Model 2: adjusting for age & ER status | 2.21 (1.04-4.70) | 0.040 | 3.92 (1.55-9.90) | 0.004 |
| Model 3: adjusting for age, ER status & tumor grade | 2.53 (1.09-5.85) | 0.031 | 3.14 (1.15-8.59) | 0.026 |
| Model 4: adjusting for age, ER status & PAM50 | 2.12 (0.91-4.94) | 0.082 | 3.34 (1.17-9.54) | 0.025 |
| Model 5: adjusting for age, ER status & PAM50 proliferation score | 1.76 (0.75-4.11) | 0.192 | 3.67 (1.31-10.29) | 0.014 |

HR, Hazard ratio; CI, confidence interval; ER. estrogen receptor; PAM50, a 50-gene signature that classifies breast cancer into five molecular intrinsic subtypes; PAM50 proliferation score was computed using 11 proliferation-related genes part of PAM50.
