# Supplementary material for: Reciprocal inhibition of PIN1 and APC/CCDH1 controls timely G1/S transition and creates therapeutic vulnerability
Source: Research Square preprint supplement (doi:10.21203/rs.3.rs-2447544/v1), 2023-01-19
Supplement: Supplementary file 2 [file 95b1ff14a8aff2f6a16c5b66.xlsx]

## Sheet: Full list
Supplementary Table 1, The DIA-MS signals of PIN1-inteacting proteins
PG.ProteinAccessions	PG.Genes	PG.ProteinDescriptions	PG.MolecularWeight	GST	GST-PIN1	LOG2FC
A0A075B6R2;A0A087WSY4;A0A0C4DH41;P01824;P01825;P06331;P0DP06;P0DP07;P0DP08	IGHV4-4;IGHV4-30-2;IGHV4-61;IGHV4-39;IGHV4-59;IGHV4-34;IGHV4-30-4;IGHV4-31;IGHV4-38-2	Immunoglobulin heavy variable 4-4;Immunoglobulin heavy variable 4-30-2;Immunoglobulin heavy variable 4-61;Immunoglobulin heavy variable 4-39;Immunoglobulin heavy variable 4-59;Immunoglobulin heavy variable 4-34;Immunoglobulin heavy variable 4-30-4;Immunoglobulin heavy variable 4-31;Immunoglobulin heavy variable 4-38-2	12847.71;13024.91;13065.91;13917.06;12935.81;13814.86;13156.04;13095;13015.9	17210.9	1	-14.071
A0A0C4DH25;P01619	IGKV3D-20;IGKV3-20	Immunoglobulin kappa variable 3D-20;Immunoglobulin kappa variable 3-20	12515.07;12557.11	11240.3	1	-13.4564
A0AV96	RBM47	RNA-binding protein 47	64099.1	59621.9	95957.6	0.686556
A0AVF1	TTC26	Intraflagellar transport protein 56	64177.6	4605.5	15641.5	1.76395
A0AVT1	UBA6	Ubiquitin-like modifier-activating enzyme 6	117970	67889.5	190674	1.48985
A0FGR8	ESYT2	Extended synaptotagmin-2	102357	68936	934805	3.76134
A0JLT2	MED19	Mediator of RNA polymerase II transcription subunit 19	26273	3126.6	52481	4.06913
A0JNW5	UHRF1BP1L	UHRF1-binding protein 1-like	164198	4256.87	15758.4	1.88826
A0MZ66	SHTN1	Shootin-1	71639.9	14865.5	36192.5	1.28372
A1A4S6	ARHGAP10	Rho GTPase-activating protein 10	89374.6	4893.27	273621	5.80524
A1L0T0	ILVBL	Acetolactate synthase-like protein	67867.7	1998.46	24988.5	3.64431
A1L170	C1orf226	Uncharacterized protein C1orf226	29057.5	4879.52	316405	6.01889
A1L390	PLEKHG3	Pleckstrin homology domain-containing family G member 3	134412	2422.25	121367	5.64688
A1XBS5	FAM92A	Protein FAM92A	33430.6	1239.38	22192.4	4.16237
A2A3K4	PTPDC1	Protein tyrosine phosphatase domain-containing protein 1	84456.7	1	9092.97	13.1505
A2RTX5	TARSL2	Probable threonine--tRNA ligase 2, cytoplasmic	92645.6	151607	402070	1.40711
A3KMH1	VWA8	von Willebrand factor A domain-containing protein 8	214824	2105.38	37432.3	4.15213
A3KN83	SBNO1	Protein strawberry notch homolog 1	154312	11333.6	67617.2	2.57679
A4D1E9	GTPBP10	GTP-binding protein 10	42932.9	26813.4	15591.4	-0.782209
A5PLN9	TRAPPC13	Trafficking protein particle complex subunit 13	46523.5	5907.85	39443.6	2.73908
A5YKK6	CNOT1	CCR4-NOT transcription complex subunit 1	266939	13332.1	191987	3.84803
A5YM69	ARHGEF35	Rho guanine nucleotide exchange factor 35	53286.7	679.332	5142.36	2.92024
A6NCE7;Q9GZQ8	MAP1LC3B2;MAP1LC3B	Microtubule-associated proteins 1A/1B light chain 3 beta 2;Microtubule-associated proteins 1A/1B light chain 3B	14627.99;14688.02	85695.8	355745	2.05355
A6NCN2	KRT87P	Putative keratin-87 protein	29117	1	456066	18.7989
A6ND36	FAM83G	Protein FAM83G	90835	8314.65	64582.4	2.95741
A6NDG6	PGP	Glycerol-3-phosphate phosphatase	34006.1	44037.5	73482.4	0.738666
A6NDU8	C5orf51	UPF0600 protein C5orf51	33620.4	535.893	14152.7	4.72299
A6NED2	RCCD1	RCC1 domain-containing protein 1	40078.9	7888.41	15006.6	0.927787
A6NFQ2	TCAF2	TRPM8 channel-associated factor 2	100906	7058.2	26565.7	1.91219
A6NHL2	TUBAL3	Tubulin alpha chain-like 3	49908.7	25519.7	265374	3.37835
A6NHR9	SMCHD1	Structural maintenance of chromosomes flexible hinge domain-containing protein 1	226374	351746	267885	-0.392917
A6NHX0	CASTOR2	Cytosolic arginine sensor for mTORC1 subunit 2	36056.4	9764.14	26924.2	1.46334
A6NI28	ARHGAP42	Rho GTPase-activating protein 42	98569	2761.88	102728	5.21703
A6NIH7	UNC119B	Protein unc-119 homolog B	28136.6	7391.23	4558.46	-0.697267
A6NIX2	WTIP	Wilms tumor protein 1-interacting protein	45124	1	13710.8	13.743
A6NJ78	METTL15	Probable methyltransferase-like protein 15	46121	1	12949.9	13.6607
A6NJ88	SAGE2P	Putative SAGE1-like protein	69022.1	1	3072.03	11.585
A6NKD9	CCDC85C	Coiled-coil domain-containing protein 85C	45209.5	8852.04	32019.7	1.85488
A6NKF1	SAC3D1	SAC3 domain-containing protein 1	43553.1	19353.2	30689.7	0.665183
A6NKP2	SDR42E2	Putative short-chain dehydrogenase/reductase family 42E member 2	46869.3	12079.2	1	-13.5602
A6NMZ7	COL6A6	Collagen alpha-6(VI) chain	247173	2488.79	186277	6.22586
A6ZKI3	RTL8C	Retrotransposon Gag-like protein 8B	13171.1	13369.1	14094.8	0.0762582
A7E2Y1	MYH7B	Myosin-7B	221388	43880.9	122551	1.48172
A7KAX9	ARHGAP32	Rho GTPase-activating protein 32	230529	1139.98	63039	5.78917
A7MCY6	TBKBP1	TANK-binding kinase 1-binding protein 1	67702.1	7020.34	89978.3	3.67996
A8MWD9;P62308	SNRPGP15;SNRPG	Putative small nuclear ribonucleoprotein G-like protein 15;Small nuclear ribonucleoprotein G	8544.04;8496.06	47874.6	1.03653e+06	4.43635
A8MXV4	NUDT19	Nucleoside diphosphate-linked moiety X motif 19	42233.3	4277.93	1045.77	-2.03235
A8MZA4;H0YM25;Q8N7Z2	GOLGA6L6;GOLGA6L22;GOLGA6L1	Golgin subfamily A member 6-like protein 6;Golgin subfamily A member 6-like protein 22;Golgin subfamily A member 6-like protein 1	90952.45;107774.11;77076.4	7155.22	16243	1.18275
B7ZAQ6;P0CG08	GPR89A;GPR89B	Golgi pH regulator A;Golgi pH regulator B	52916.96;52916.96	2031.15	7673.99	1.91768
B9A064;P0CG04;P0DOX8;P0DOY2;P0DOY3	IGLL5;IGLC1;;IGLC2;IGLC3	Immunoglobulin lambda-like polypeptide 5;Immunoglobulin lambda constant 1;Immunoglobulin lambda-1 light chain;Immunoglobulin lambda constant 2;Immunoglobulin lambda constant 3	23063.24;11347.66;22830.17;11293.56;11265.55	42933.3	49600.7	0.208265
C4AMC7;Q6VEQ5	WASH3P;WASH2P	Putative WAS protein family homolog 3;WAS protein family homolog 2	49994.54;50312.01	35417.4	131281	1.89013
C9JLW8	MCRIP1	Mapk-regulated corepressor-interacting protein 1	10920.2	1	93737.5	16.5163
E9PAV3;Q13765	NACA	Nascent polypeptide-associated complex subunit alpha, muscle-specific form;Nascent polypeptide-associated complex subunit alpha	205421.52;23383.89	99457.8	331428	1.73654
L0R819	ASDURF	ASNSD1 upstream open reading frame protein	11249.8	1	37543.9	15.1963
O00116	AGPS	Alkyldihydroxyacetonephosphate synthase, peroxisomal	72911.8	64041.8	136159	1.0882
O00139	KIF2A	Kinesin-like protein KIF2A	79954.5	41572.7	730533	4.13524
O00142	TK2	Thymidine kinase 2, mitochondrial	31004.8	3045.02	45068.8	3.88761
O00148	DDX39A	ATP-dependent RNA helicase DDX39A	49129.5	318195	957114	1.58878
O00151	PDLIM1	PDZ and LIM domain protein 1	36071.7	31448.2	58835.4	0.903709
O00154	ACOT7	Cytosolic acyl coenzyme A thioester hydrolase	41796	203622	220952	0.117841
O00159	MYO1C	Unconventional myosin-Ic	121682	59244.3	663054	3.48438
O00165	HAX1	HCLS1-associated protein X-1	31620.5	6180.69	12906	1.0622
O00170	AIP	AH receptor-interacting protein	37636	15205.7	75685.1	2.31539
O00178	GTPBP1	GTP-binding protein 1	72453.8	3431.66	136703	5.31599
O00186	STXBP3	Syntaxin-binding protein 3	67764.3	23936.5	123592	2.3683
O00189	AP4M1	AP-4 complex subunit mu-1	49977	6843.33	18787.8	1.45703
O00193	SMAP	Small acidic protein	20332.5	40676.6	606043	3.89715
O00203	AP3B1	AP-3 complex subunit beta-1	121320	28929.3	271694	3.23138
O00213	APBB1	Amyloid-beta A4 precursor protein-binding family B member 1	77244.2	5703.8	186943	5.03454
O00214	LGALS8	Galectin-8	35808.1	6449.94	1	-12.6551
O00217	NDUFS8	NADH dehydrogenase [ubiquinone] iron-sulfur protein 8, mitochondrial	23705.1	969.184	6745	2.79898
O00221	NFKBIE	NF-kappa-B inhibitor epsilon	52863.5	5712.28	16755.7	1.55251
O00231	PSMD11	26S proteasome non-ATPase regulatory subunit 11	47463.8	536728	470962	-0.188579
O00232	PSMD12	26S proteasome non-ATPase regulatory subunit 12	52904.4	564379	542311	-0.0575456
O00233	PSMD9	26S proteasome non-ATPase regulatory subunit 9	24681.8	246685	115115	-1.09959
O00255	MEN1	Menin	68023.4	6823.3	41535.4	2.6058
O00257	CBX4	E3 SUMO-protein ligase CBX4	61367.5	1	14787.9	13.8521
O00267	SUPT5H	Transcription elongation factor SPT5	121000	4441.84	93637.8	4.39786
O00268	TAF4	Transcription initiation factor TFIID subunit 4	110114	1745.62	18116.7	3.37551
O00273	DFFA	DNA fragmentation factor subunit alpha	36521.9	6088.07	1	-12.5718
O00287	RFXAP	Regulatory factor X-associated protein	28232.3	899.726	12676.5	3.81653
O00291	HIP1	Huntingtin-interacting protein 1	116221	13859.1	61333.5	2.14585
O00299	CLIC1	Chloride intracellular channel protein 1	26922.7	2.12413e+06	1.81276e+06	-0.228681
O00303	EIF3F	Eukaryotic translation initiation factor 3 subunit F	37563.8	381004	1.69503e+06	2.15343
O00308	WWP2	NEDD4-like E3 ubiquitin-protein ligase WWP2	98912.1	4529.05	110793	4.61251
O00311	CDC7	Cell division cycle 7-related protein kinase	63888.2	175.549	9206.13	5.71265
O00327	ARNTL	Aryl hydrocarbon receptor nuclear translocator-like protein 1	68761.8	1	5429.06	12.4065
O00329	PIK3CD	Phosphatidylinositol 4,5-bisphosphate 3-kinase catalytic subunit delta isoform	119479	1070.99	7681.88	2.84252
O00330	PDHX	Pyruvate dehydrogenase protein X component, mitochondrial	54122.3	18676.7	257695	3.78635
O00391	QSOX1	Sulfhydryl oxidase 1	82577.7	5434.58	84034.4	3.95074
O00401	WASL	Neural Wiskott-Aldrich syndrome protein	54827	396051	793432	1.00242
O00410	IPO5	Importin-5	123630	362887	1.0396e+06	1.51844
O00411	POLRMT	DNA-directed RNA polymerase, mitochondrial	138620	892.579	20199.5	4.5002
O00418	EEF2K	Eukaryotic elongation factor 2 kinase	82144.1	18716.6	120845	2.69076
O00421	CCRL2	C-C chemokine receptor-like 2	39513.4	339816	154548	-1.13669
O00422	SAP18	Histone deacetylase complex subunit SAP18	17561.1	7641.07	19059.6	1.31867
O00425	IGF2BP3	Insulin-like growth factor 2 mRNA-binding protein 3	63705	136591	249938	0.871707
O00429	DNM1L	Dynamin-1-like protein	81877.1	206746	802112	1.95595
O00442	RTCA	RNA 3'-terminal phosphate cyclase	39336.7	48322.8	205741	2.09005
O00443	PIK3C2A	Phosphatidylinositol 4-phosphate 3-kinase C2 domain-containing subunit alpha	190680	5817.8	60140.4	3.36979
O00444	PLK4	Serine/threonine-protein kinase PLK4	108972	1524.17	5623.16	1.88335
O00458	IFRD1	Interferon-related developmental regulator 1	50268.6	396.654	7045.08	4.15066
O00459	PIK3R2	Phosphatidylinositol 3-kinase regulatory subunit beta	81545.3	5182.92	116032	4.48461
O00461	GOLIM4	Golgi integral membrane protein 4	81880.3	12900.7	281272	4.44645
O00463	TRAF5	TNF receptor-associated factor 5	64405.7	2124.01	42188.3	4.31198
O00468	AGRN	Agrin	217232	2989.95	20406.7	2.77085
O00469	PLOD2	Procollagen-lysine,2-oxoglutarate 5-dioxygenase 2	84685.6	40309.3	127522	1.66157
O00471	EXOC5	Exocyst complex component 5	81852.9	6159.69	102616	4.05826
O00472	ELL2	RNA polymerase II elongation factor ELL2	72324.4	1	6653.97	12.7
O00481	BTN3A1	Butyrophilin subfamily 3 member A1	57677.2	14120.6	50689.6	1.84389
O00483	NDUFA4	Cytochrome c oxidase subunit NDUFA4	9369.86	1	36893.5	15.1711
O00487	PSMD14	26S proteasome non-ATPase regulatory subunit 14	34577	16099.8	130372	3.01752
O00505	KPNA3	Importin subunit alpha-4	57810.9	172724	395271	1.19437
O00506	STK25	Serine/threonine-protein kinase 25	48111.7	5093.05	7667.56	0.59024
O00512	BCL9	B-cell CLL/lymphoma 9 protein	149290	6080.87	52220.1	3.10225
O00522	KRIT1	Krev interaction trapped protein 1	84348.1	1616.66	42182.4	4.70556
O00541	PES1	Pescadillo homolog	68002.6	3179.79	149352	5.55364
O00560	SDCBP	Syntenin-1	32444.4	37743.4	162399	2.10525
O00562	PITPNM1	Membrane-associated phosphatidylinositol transfer protein 1	134848	451098	1.71365e+06	1.92556
O00567	NOP56	Nucleolar protein 56	66049.9	15186.6	180090	3.56784
O00571	DDX3X	ATP-dependent RNA helicase DDX3X	73243.4	208541	2.49021e+06	3.57787
O00592	PODXL	Podocalyxin	58635.2	130755	340157	1.37933
O00622	CYR61	Protein CYR61	42026.6	135697	409219	1.59249
O00629	KPNA4	Importin subunit alpha-3	57886.8	18679.4	119475	2.67719
O00635	TRIM38	E3 ubiquitin-protein ligase TRIM38	53415.8	7959.22	15507.2	0.962238
O00712	NFIB	Nuclear factor 1 B-type	47441.9	2.66928e+06	829033	-1.68695
O00716	E2F3	Transcription factor E2F3	49161.6	1	5739.21	12.4866
O00743	PPP6C	Serine/threonine-protein phosphatase 6 catalytic subunit	35144.3	43189.1	85159.4	0.979497
O00762	UBE2C	Ubiquitin-conjugating enzyme E2 C	19652.3	1	33102.2	15.0146
O00764	PDXK	Pyridoxal kinase	35102.3	7527.97	19859.6	1.39951
O14497	ARID1A	AT-rich interactive domain-containing protein 1A	242045	1	130988	16.9991
O14523	C2CD2L	Phospholipid transfer protein C2CD2L	76181.3	1	11921.2	13.5412
O14530	TXNDC9	Thioredoxin domain-containing protein 9	26534	17175.5	93922	2.45111
O14531	DPYSL4	Dihydropyrimidinase-related protein 4	61877.6	307.275	3209.88	3.38492
O14545	TRAFD1	TRAF-type zinc finger domain-containing protein 1	64841.1	2967.67	21256.3	2.84048
O14548	COX7A2L	Cytochrome c oxidase subunit 7A-related protein, mitochondrial	12614.7	1	49405.9	15.5924
O14556	GAPDHS	Glyceraldehyde-3-phosphate dehydrogenase, testis-specific	44501.2	59321.2	98511.6	0.731746
O14562	UBFD1	Ubiquitin domain-containing protein UBFD1	33381.9	59820.8	3849.03	-3.95808
O14578	CIT	Citron Rho-interacting kinase	231431	1118.77	27290.3	4.60841
O14579	COPE	Coatomer subunit epsilon	34482	80283.5	886282	3.46459
O14602;P47813	EIF1AY;EIF1AX	Eukaryotic translation initiation factor 1A, Y-chromosomal;Eukaryotic translation initiation factor 1A, X-chromosomal	16442.36;16460.4	1	84219	16.3619
O14613	CDC42EP2	Cdc42 effector protein 2	22483.6	36843.9	234117	2.66773
O14617	AP3D1	AP-3 complex subunit delta-1	130158	6643.69	523254	6.29938
O14618	CCS	Copper chaperone for superoxide dismutase	29040.6	29024.9	15810.9	-0.876373
O14639	ABLIM1	Actin-binding LIM protein 1	87687.5	4054.89	75598.4	4.22062
O14640	DVL1	Segment polarity protein dishevelled homolog DVL-1	75186.8	14116.8	100985	2.83866
O14641	DVL2	Segment polarity protein dishevelled homolog DVL-2	78947.9	13524.1	81055	2.58337
O14656	TOR1A	Torsin-1A	37808.7	28631.1	58162.3	1.0225
O14657	TOR1B	Torsin-1B	37978.9	24936.6	34049.5	0.449369
O14662	STX16	Syntaxin-16	37031.2	1057.84	20434.5	4.27181
O14672	ADAM10	Disintegrin and metalloproteinase domain-containing protein 10	84142.1	20212.1	95812.2	2.24499
O14678	ABCD4	ATP-binding cassette sub-family D member 4	68597.4	1	24325.2	14.5702
O14682	ENC1	Ectoderm-neural cortex protein 1	66129.8	805.796	5045.88	2.64662
O14684	PTGES	Prostaglandin E synthase	17102.3	810.62	10713	3.72419
O14686	KMT2D	Histone-lysine N-methyltransferase 2D	593389	36507.1	202903	2.47454
O14727	APAF1	Apoptotic protease-activating factor 1	141840	10964.1	56003.9	2.35274
O14730	RIOK3	Serine/threonine-protein kinase RIO3	59093	30025.6	213239	2.8282
O14732	IMPA2	Inositol monophosphatase 2	31320.9	29771.6	28934.5	-0.0411488
O14734	ACOT8	Acyl-coenzyme A thioesterase 8	35914.2	61729.4	169414	1.45652
O14744	PRMT5	Protein arginine N-methyltransferase 5	72683.9	210922	622877	1.56224
O14745	SLC9A3R1	Na(+)/H(+) exchange regulatory cofactor NHE-RF1	38868.4	9182.01	1	-13.1646
O14757	CHEK1	Serine/threonine-protein kinase Chk1	54433.6	31415.4	131074	2.06084
O14772	FPGT	Fucose-1-phosphate guanylyltransferase	66598.9	10834.4	27334.9	1.33512
O14773	TPP1	Tripeptidyl-peptidase 1	61247.9	20755.4	57437.1	1.4685
O14776	TCERG1	Transcription elongation regulator 1	123901	56588.5	984009	4.12009
O14777	NDC80	Kinetochore protein NDC80 homolog	73912.7	17237	172052	3.31927
O14786	NRP1	Neuropilin-1	103134	5372.96	64658.7	3.58906
O14787	TNPO2	Transportin-2	101388	57347.1	253095	2.14189
O14802	POLR3A	DNA-directed RNA polymerase III subunit RPC1	155641	1	33810.4	15.0452
O14818	PSMA7	Proteasome subunit alpha type-7	27886.8	90170.6	421442	2.2246
O14828	SCAMP3	Secretory carrier-associated membrane protein 3	38287	47134.1	118165	1.32597
O14867	BACH1	Transcription regulator protein BACH1	81957.7	3041.12	7972.57	1.39044
O14874	BCKDK	[3-methyl-2-oxobutanoate dehydrogenase [lipoamide]] kinase, mitochondrial	46360.4	1	60561.7	15.8861
O14879	IFIT3	Interferon-induced protein with tetratricopeptide repeats 3	55984.8	14918.4	163171	3.45122
O14880	MGST3	Microsomal glutathione S-transferase 3	16516.3	5203.65	213106	5.35591
O14893	GEMIN2	Gem-associated protein 2	31585.1	19360.9	13469.7	-0.523428
O14904	WNT9A	Protein Wnt-9a	40320.2	78347.4	373739	2.25407
O14908	GIPC1	PDZ domain-containing protein GIPC1	36049.2	6449.15	36197.2	2.4887
O14920	IKBKB	Inhibitor of nuclear factor kappa-B kinase subunit beta	86563.9	6399.93	76135.7	3.57245
O14924	RGS12	Regulator of G-protein signaling 12	156357	1	14043.5	13.7776
O14925;Q5SRD1	TIMM23;TIMM23B	Mitochondrial import inner membrane translocase subunit Tim23;Putative mitochondrial import inner membrane translocase subunit Tim23B	21943.14;28048.41	1	8395.24	13.0354
O14929	HAT1	Histone acetyltransferase type B catalytic subunit	49512.6	20700.4	21319.1	0.0424879
O14933	UBE2L6	Ubiquitin/ISG15-conjugating enzyme E2 L6	17768.7	22790.9	76915.9	1.75482
O14936	CASK	Peripheral plasma membrane protein CASK	105123	35384.9	1.53089e+06	5.43509
O14939	PLD2	Phospholipase D2	105987	5430.98	37843	2.80074
O14949	UQCRQ	Cytochrome b-c1 complex subunit 8	9906.37	16777.6	119926	2.83754
O14950;P19105	MYL12B;MYL12A	Myosin regulatory light chain 12B;Myosin regulatory light chain 12A	19779.15;19794.13	73853.3	189592	1.36016
O14964	HGS	Hepatocyte growth factor-regulated tyrosine kinase substrate	86192	21461.5	42014.7	0.969142
O14965	AURKA	Aurora kinase A	45809.4	19709.2	152291	2.94989
O14966	RAB29	Ras-related protein Rab-7L1	23155.2	1	45484.2	15.4731
O14967	CLGN	Calmegin	70038.6	17544.7	130059	2.89006
O14972	DSCR3	Down syndrome critical region protein 3	33010.4	7685.24	10285.2	0.420401
O14974	PPP1R12A	Protein phosphatase 1 regulatory subunit 12A	115281	31796.5	101540	1.67511
O14979	HNRNPDL	Heterogeneous nuclear ribonucleoprotein D-like	46437.5	49850.2	495428	3.313
O14980	XPO1	Exportin-1	123386	13548.1	193082	3.83305
O14981	BTAF1	TATA-binding protein-associated factor 172	206887	1	128050	16.9664
O15013	ARHGEF10	Rho guanine nucleotide exchange factor 10	151612	1525.94	20963.7	3.78012
O15014	ZNF609	Zinc finger protein 609	151191	1	63888.1	15.9633
O15027	SEC16A	Protein transport protein Sec16A	233517	22913	215806	3.2355
O15031	PLXNB2	Plexin-B2	205127	73869.5	219336	1.57009
O15037	KHNYN	Protein KHNYN	74534	4302.59	28280.2	2.71651
O15040	TECPR2	Tectonin beta-propeller repeat-containing protein 2	153848	11676.6	190109	4.02513
O15042	U2SURP	U2 snRNP-associated SURP motif-containing protein	118292	37841.2	368924	3.2853
O15047	SETD1A	Histone-lysine N-methyltransferase SETD1A	186034	1795.41	252923	7.13824
O15056	SYNJ2	Synaptojanin-2	165538	41548.1	108004	1.37822
O15066	KIF3B	Kinesin-like protein KIF3B	85125.1	27685.1	143321	2.37207
O15067	PFAS	Phosphoribosylformylglycinamidine synthase	144734	41399.2	69894.5	0.755574
O15078	CEP290	Centrosomal protein of 290 kDa	290386	1	45482.5	15.473
O15084	ANKRD28	Serine/threonine-protein phosphatase 6 regulatory ankyrin repeat subunit A	112966	15245.3	232858	3.93301
O15085	ARHGEF11	Rho guanine nucleotide exchange factor 11	167704	9118.14	512189	5.81179
O15091	KIAA0391	Mitochondrial ribonuclease P catalytic subunit	67315.3	14952.2	80837.5	2.43467
O15111	CHUK	Inhibitor of nuclear factor kappa-B kinase subunit alpha	84639.6	10552.7	99343.8	3.23482
O15118	NPC1	Niemann-Pick C1 protein	142167	18426.3	71056.6	1.9472
O15121	DEGS1	Sphingolipid delta(4)-desaturase DES1	37866	1	6759.36	12.7227
O15126	SCAMP1	Secretory carrier-associated membrane protein 1	37920.4	5225.42	8239.89	0.657078
O15127	SCAMP2	Secretory carrier-associated membrane protein 2	36648.9	21871.7	165886	2.92306
O15143	ARPC1B	Actin-related protein 2/3 complex subunit 1B	40949.8	28645.1	19623.7	-0.545694
O15144	ARPC2	Actin-related protein 2/3 complex subunit 2	34333	149534	59663.1	-1.32556
O15145	ARPC3	Actin-related protein 2/3 complex subunit 3	20546.7	269704	33513	-3.00858
O15155	BET1	BET1 homolog	13289.4	1	27510.8	14.7477
O15160	POLR1C	DNA-directed RNA polymerases I and III subunit RPAC1	39249.7	177196	80624.6	-1.13606
O15164	TRIM24	Transcription intermediary factor 1-alpha	116831	3825.94	64130.9	4.06713
O15169	AXIN1	Axin-1	95635	1	23943	14.5473
O15173	PGRMC2	Membrane-associated progesterone receptor component 2	23818.5	10448	27732.2	1.40833
O15194	CTDSPL	CTD small phosphatase-like protein	31128.6	25580	175709	2.7801
O15211	RGL2	Ral guanine nucleotide dissociation stimulator-like 2	83549	33241.4	99708	1.58473
O15212	PFDN6	Prefoldin subunit 6	14582.7	18809.9	76809.5	2.0298
O15213	WDR46	WD repeat-containing protein 46	68071.1	1	18494.4	14.1748
O15217	GSTA4	Glutathione S-transferase A4	25704.1	129896	267168	1.04039
O15226	NKRF	NF-kappa-B-repressing factor	77672.9	15816.5	143311	3.17965
O15228	GNPAT	Dihydroxyacetone phosphate acyltransferase	77187.9	3964.24	23868.7	2.59
O15231	ZNF185	Zinc finger protein 185	73525.4	33334.2	774340	4.53789
O15234	CASC3	Protein CASC3	76278	3355.89	109703	5.03077
O15235	MRPS12	28S ribosomal protein S12, mitochondrial	15172.9	7375.07	15083.5	1.03224
O15254	ACOX3	Peroxisomal acyl-coenzyme A oxidase 3	77629.1	17718.7	26876.5	0.601077
O15258	RER1	Protein RER1	22958	6774.66	86459.4	3.6738
O15260	SURF4	Surfeit locus protein 4	30394	20086.4	159991	2.9937
O15264	MAPK13	Mitogen-activated protein kinase 13	42089.6	8585.99	1	-13.0678
O15269	SPTLC1	Serine palmitoyltransferase 1	52743.9	137089	210936	0.621697
O15270	SPTLC2	Serine palmitoyltransferase 2	62924.3	16153.8	128785	2.99502
O15294	OGT	UDP-N-acetylglucosamine--peptide N-acetylglucosaminyltransferase 110 kDa subunit	116925	43980.6	723209	4.03947
O15304	SIVA1	Apoptosis regulatory protein Siva	18694.6	1	14469.9	13.8208
O15305	PMM2	Phosphomannomutase 2	28082.1	33804.6	88575.6	1.38969
O15315	RAD51B	DNA repair protein RAD51 homolog 2	42195.7	4837.59	12240	1.33924
O15320;Q96PC5	CTAGE5;MIA2	Endoplasmic reticulum export factor CTAGE5;Melanoma inhibitory activity protein 2	90996.3;159835.76	23718.3	504270	4.41012
O15321	TM9SF1	Transmembrane 9 superfamily member 1	68860.6	3552.26	7213.44	1.02195
O15327	INPP4B	Type II inositol 3,4-bisphosphate 4-phosphatase	104738	44248.2	194707	2.13761
O15344	MID1	E3 ubiquitin-protein ligase Midline-1	75250.7	34095.5	213814	2.6487
O15355	PPM1G	Protein phosphatase 1G	59271.6	73140.3	251674	1.78282
O15357	INPPL1	Phosphatidylinositol 3,4,5-trisphosphate 5-phosphatase 2	138599	3.1457e+06	4.54051e+06	0.529474
O15371	EIF3D	Eukaryotic translation initiation factor 3 subunit D	63972.8	133102	992393	2.89838
O15372	EIF3H	Eukaryotic translation initiation factor 3 subunit H	39930.3	164858	358438	1.1205
O15379	HDAC3	Histone deacetylase 3	48847.7	13131.8	97006.4	2.88502
O15382	BCAT2	Branched-chain-amino-acid aminotransferase, mitochondrial	44287.7	33094.9	5675.8	-2.54371
O15397	IPO8	Importin-8	119938	10926.5	121636	3.47668
O15400	STX7	Syntaxin-7	29815.5	6004.33	106721	4.15169
O15427	SLC16A3	Monocarboxylate transporter 4	49469.4	177717	404306	1.18586
O15428	PIN1P1	Putative PIN1-like protein	11021.2	4051.6	4.28417e+06	10.0463
O15439	ABCC4	Multidrug resistance-associated protein 4	149527	5876.74	27380.2	2.22004
O15446	CD3EAP	DNA-directed RNA polymerase I subunit RPA34	54985.6	6211.81	81693	3.71713
O15460	P4HA2	Prolyl 4-hydroxylase subunit alpha-2	60901.9	12321.4	109215	3.14793
O15488	GYG2	Glycogenin-2	55183.8	662.896	19953.8	4.91174
O15498	YKT6	Synaptobrevin homolog YKT6	22417.6	26696.7	51949.1	0.960436
O15514	POLR2D	DNA-directed RNA polymerase II subunit RPB4	16311.3	1	1.08883e+06	20.0543
O15530	PDPK1	3-phosphoinositide-dependent protein kinase 1	63151.8	9226.21	41220.3	2.15954
O15533	TAPBP	Tapasin	47625.8	66836.5	300604	2.16916
O15534	PER1	Period circadian protein homolog 1	136212	1119.62	24472.1	4.45005
O15550	KDM6A	Lysine-specific demethylase 6A	154177	3215.98	126707	5.3001
O43143	DHX15	Pre-mRNA-splicing factor ATP-dependent RNA helicase DHX15	90932.8	277733	2.83097e+06	3.34952
O43148	RNMT	mRNA cap guanine-N7 methyltransferase	54844.1	8794.17	153135	4.12211
O43156	TTI1	TELO2-interacting protein 1 homolog	122069	1	11426.3	13.4801
O43159	RRP8	Ribosomal RNA-processing protein 8	50714.8	1	31878.4	14.9603
O43164	PJA2	E3 ubiquitin-protein ligase Praja-2	78214.1	5592.58	62823.7	3.48972
O43172	PRPF4	U4/U6 small nuclear ribonucleoprotein Prp4	58449.2	29322.4	404708	3.78681
O43175	PHGDH	D-3-phosphoglycerate dehydrogenase	56650.5	42566.9	146626	1.78434
O43181	NDUFS4	NADH dehydrogenase [ubiquinone] iron-sulfur protein 4, mitochondrial	20108	1	49899.8	15.6067
O43237	DYNC1LI2	Cytoplasmic dynein 1 light intermediate chain 2	54099.3	11639.9	206519	4.14913
O43242	PSMD3	26S proteasome non-ATPase regulatory subunit 3	60977.6	840043	1.25471e+06	0.578817
O43251	RBFOX2	RNA binding protein fox-1 homolog 2	41373.8	13934.8	71450.1	2.35824
O43252	PAPSS1	Bifunctional 3'-phosphoadenosine 5'-phosphosulfate synthase 1	70833.1	26205.7	199116	2.92566
O43264	ZW10	Centromere/kinetochore protein zw10 homolog	88829.5	16925.1	254347	3.90957
O43272	PRODH	Proline dehydrogenase 1, mitochondrial	68002	15844.8	84373.7	2.41278
O43290	SART1	U4/U6.U5 tri-snRNP-associated protein 1	90254.8	4777.53	374202	6.29141
O43291	SPINT2	Kunitz-type protease inhibitor 2	28228.2	15090.3	65003.4	2.10689
O43292	GPAA1	Glycosylphosphatidylinositol anchor attachment 1 protein	67623.2	5738.97	28459.2	2.31003
O43293	DAPK3	Death-associated protein kinase 3	52535.7	4908.67	52516.2	3.41936
O43294	TGFB1I1	Transforming growth factor beta-1-induced transcript 1 protein	49814.2	13455.3	1.01474e+06	6.2368
O43295	SRGAP3	SLIT-ROBO Rho GTPase-activating protein 3	124504	61215.7	47698.3	-0.359963
O43299	AP5Z1	AP-5 complex subunit zeta-1	88605.2	2924.54	12213.7	2.06221
O43301	HSPA12A	Heat shock 70 kDa protein 12A	74978.4	4696.41	38885.3	3.04959
O43307;Q96N96;Q9NR80	ARHGEF9;SPATA13;ARHGEF4	Rho guanine nucleotide exchange factor 9;Spermatogenesis-associated protein 13;Rho guanine nucleotide exchange factor 4	60982.22;74819.77;79066.54	1	13277.5	13.6967
O43310	CTIF	CBP80/20-dependent translation initiation factor	67586.7	15372.4	61969.4	2.01121
O43314	PPIP5K2	Inositol hexakisphosphate and diphosphoinositol-pentakisphosphate kinase 2	140407	48602.4	317254	2.70654
O43318	MAP3K7	Mitogen-activated protein kinase kinase kinase 7	67196.1	20507.5	1.06437e+06	5.69771
O43324	EEF1E1	Eukaryotic translation elongation factor 1 epsilon-1	19810.6	205531	224940	0.13018
O43353	RIPK2	Receptor-interacting serine/threonine-protein kinase 2	61194.9	16204.3	68108.2	2.07145
O43379	WDR62	WD repeat-containing protein 62	165954	10506.4	538572	5.6798
O43390	HNRNPR	Heterogeneous nuclear ribonucleoprotein R	70943.1	13784.7	289644	4.39314
O43395	PRPF3	U4/U6 small nuclear ribonucleoprotein Prp3	77528.9	143206	3.15675e+06	4.46228
O43396	TXNL1	Thioredoxin-like protein 1	32251.3	58573.6	414017	2.82137
O43399	TPD52L2	Tumor protein D54	22237.7	44816.7	55960	0.320361
O43402	EMC8	ER membrane protein complex subunit 8	23773	1	41196.6	15.3302
O43414	ERI3	ERI1 exoribonuclease 3	37238.2	1	145877	17.1544
O43422	THAP12	52 kDa repressor of the inhibitor of the protein kinase	87704	2021.26	2672.55	0.402961
O43426	SYNJ1	Synaptojanin-1	173103	1	13811.3	13.7536
O43427	FIBP	Acidic fibroblast growth factor intracellular-binding protein	41878.1	15719.3	151886	3.27237
O43432	EIF4G3	Eukaryotic translation initiation factor 4 gamma 3	176652	7291.85	239400	5.03699
O43439	CBFA2T2	Protein CBFA2T2	67132.7	6434.6	229976	5.15949
O43447	PPIH	Peptidyl-prolyl cis-trans isomerase H	19208.1	5800.59	25983.2	2.1633
O43464	HTRA2	Serine protease HTRA2, mitochondrial	48840.8	11320.7	85652.2	2.91953
O43488	AKR7A2	Aflatoxin B1 aldehyde reductase member 2	39589	12011.1	5741.18	-1.06494
O43491	EPB41L2	Band 4.1-like protein 2	112588	15765	40019.3	1.34397
O43493	TGOLN2	Trans-Golgi network integral membrane protein 2	51112.8	7566.52	48019.1	2.66591
O43502	RAD51C	DNA repair protein RAD51 homolog 3	42189.6	16016	12036.1	-0.412146
O43513	MED7	Mediator of RNA polymerase II transcription subunit 7	27245.2	2046.69	21185.1	3.37168
O43516	WIPF1	WAS/WASL-interacting protein family member 1	51258.5	26171	75394.5	1.52649
O43524	FOXO3	Forkhead box protein O3	71276.6	1901.15	49600.5	4.70541
O43542	XRCC3	DNA repair protein XRCC3	37849.8	3219.43	1	-11.6526
O43572	AKAP10	A-kinase anchor protein 10, mitochondrial	73818.2	6762.3	21716	1.68317
O43583	DENR	Density-regulated protein	22092	68896.5	94906.3	0.462073
O43592	XPOT	Exportin-T	109964	339049	864919	1.35107
O43615	TIMM44	Mitochondrial import inner membrane translocase subunit TIM44	51355.7	172616	136954	-0.333873
O43617	TRAPPC3	Trafficking protein particle complex subunit 3	20274.1	43756.8	46344.5	0.0828892
O43633	CHMP2A	Charged multivesicular body protein 2a	25103.9	36656.1	52846.7	0.527761
O43639	NCK2	Cytoplasmic protein NCK2	42915.1	11865.6	16347.8	0.462317
O43660	PLRG1	Pleiotropic regulator 1	57193.8	3226.53	91821.6	4.83078
O43663	PRC1	Protein regulator of cytokinesis 1	71606.6	8829.92	81939.2	3.21408
O43670	ZNF207	BUB3-interacting and GLEBS motif-containing protein ZNF207	50750.5	48723.6	846810	4.11935
O43676	NDUFB3	NADH dehydrogenase [ubiquinone] 1 beta subcomplex subunit 3	11402	4730.63	58051.2	3.61722
O43681	ASNA1	ATPase ASNA1	38792.8	29697.6	45945.1	0.629566
O43683	BUB1	Mitotic checkpoint serine/threonine-protein kinase BUB1	122375	145204	2.21706e+06	3.93249
O43684	BUB3	Mitotic checkpoint protein BUB3	37154.8	47800.5	374372	2.96937
O43688	PLPP2	Phospholipid phosphatase 2	32573.8	5218.76	68993.2	3.72468
O43707	ACTN4	Alpha-actinin-4	104854	343820	479866	0.480979
O43709	BUD23	Probable 18S rRNA (guanine-N(7))-methyltransferase	31880.4	1	12620.5	13.6235
O43719	HTATSF1	HIV Tat-specific factor 1	85852.8	56993	215615	1.9196
O43734	TRAF3IP2	Adapter protein CIKS	64666.2	2834.58	14971.2	2.40098
O43739	CYTH3	Cytohesin-3	46348.6	14460	144666	3.32258
O43741	PRKAB2	5'-AMP-activated protein kinase subunit beta-2	30302.2	2170.79	16016	2.88322
O43747	AP1G1	AP-1 complex subunit gamma-1	91351.4	57767.5	272048	2.23553
O43752	STX6	Syntaxin-6	29176	4501.02	33550.1	2.89799
O43760	SYNGR2	Synaptogyrin-2	24810	7991.93	79048.9	3.30613
O43765	SGTA	Small glutamine-rich tetratricopeptide repeat-containing protein alpha	34063.1	7347.06	55884.4	2.92721
O43772	SLC25A20	Mitochondrial carnitine/acylcarnitine carrier protein	32943.7	4828.66	1	-12.2374
O43776	NARS	Asparagine--tRNA ligase, cytoplasmic	62942.9	60097.5	160119	1.41377
O43795	MYO1B	Unconventional myosin-Ib	131985	33055.2	550569	4.05798
O43809	NUDT21	Cleavage and polyadenylation specificity factor subunit 5	26227.3	167700	428906	1.35478
O43813	LANCL1	LanC-like protein 1	45283.1	501171	169797	-1.56149
O43815	STRN	Striatin	86132.1	15392.2	64146.4	2.05917
O43818	RRP9	U3 small nucleolar RNA-interacting protein 2	51840.7	41320.5	221737	2.42392
O43819	SCO2	Protein SCO2 homolog, mitochondrial	29809.9	14514.1	39366	1.4395
O43823	AKAP8	A-kinase anchor protein 8	76108.3	301.381	72561.3	7.91147
O43824	GTPBP6	Putative GTP-binding protein 6	56883.4	15319.7	204218	3.73665
O43837	IDH3B	Isocitrate dehydrogenase [NAD] subunit beta, mitochondrial	42183.7	62327.2	235849	1.91993
O43847	NRDC	Nardilysin	131572	41261.7	249672	2.59716
O43852	CALU	Calumenin	37106.8	599096	765145	0.352946
O43854	EDIL3	EGF-like repeat and discoidin I-like domain-containing protein 3	53764.9	119421	104157	-0.197296
O43865	AHCYL1	S-adenosylhomocysteine hydrolase-like protein 1	58951.4	76372.1	359733	2.23581
O43896	KIF1C	Kinesin-like protein KIF1C	122947	275736	1.10737e+06	2.00578
O43913	ORC5	Origin recognition complex subunit 5	50283.1	1	6081.16	12.5701
O43929	ORC4	Origin recognition complex subunit 4	50377.3	2223.2	24651.4	3.47096
O60216	RAD21	Double-strand-break repair protein rad21 homolog	71689.5	889.035	25053.5	4.81663
O60231	DHX16	Pre-mRNA-splicing factor ATP-dependent RNA helicase DHX16	119264	18809.5	189917	3.33583
O60232	SSSCA1	Sjoegren syndrome/scleroderma autoantigen 1	21474.3	145743	1.41432e+07	6.60054
O60238	BNIP3L	BCL2/adenovirus E1B 19 kDa protein-interacting protein 3-like	23930.4	11978.3	31979.1	1.41671
O60239	SH3BP5	SH3 domain-binding protein 5	50425	1	21871.9	14.4168
O60244	MED14	Mediator of RNA polymerase II transcription subunit 14	160607	2351.06	211690	6.4925
O60256	PRPSAP2	Phosphoribosyl pyrophosphate synthase-associated protein 2	40925.7	205066	673304	1.71517
O60264	SMARCA5	SWI/SNF-related matrix-associated actin-dependent regulator of chromatin subfamily A member 5	121905	1	136660	17.0602
O60271	SPAG9	C-Jun-amino-terminal kinase-interacting protein 4	146205	17916.6	366651	4.35504
O60285	NUAK1	NUAK family SNF1-like kinase 1	74305.2	7924.12	33717.4	2.08917
O60291	MGRN1	E3 ubiquitin-protein ligase MGRN1	60753	12475.7	38011.5	1.60732
O60292	SIPA1L3	Signal-induced proliferation-associated 1-like protein 3	194610	327678	240202	-0.448027
O60296	TRAK2	Trafficking kinesin-binding protein 2	101419	3685.23	50916.6	3.78831
O60306	AQR	Intron-binding protein aquarius	171295	5705.49	140958	4.62677
O60307	MAST3	Microtubule-associated serine/threonine-protein kinase 3	143137	1	24452	14.5777
O60313	OPA1	Dynamin-like 120 kDa protein, mitochondrial	111631	54485.4	194861	1.8385
O60315	ZEB2	Zinc finger E-box-binding homeobox 2	136447	1	20432.2	14.3186
O60318	MCM3AP	Germinal-center associated nuclear protein	218405	1	19739.6	14.2688
O60331	PIP5K1C	Phosphatidylinositol 4-phosphate 5-kinase type-1 gamma	73260	1681.31	10136.8	2.59194
O60333	KIF1B	Kinesin-like protein KIF1B	204476	7311.26	136210	4.21957
O60336	MAPKBP1	Mitogen-activated protein kinase-binding protein 1	163818	2158.13	74033.2	5.10032
O60341	KDM1A	Lysine-specific histone demethylase 1A	92902.6	3914.74	101768	4.70023
O60343	TBC1D4	TBC1 domain family member 4	146563	29830.5	2.55834e+06	6.42228
O60344	ECE2	Endothelin-converting enzyme 2	99773.4	78850.1	92118.2	0.224372
O60347	TBC1D12	TBC1 domain family member 12	85625.6	2504.72	34678.7	3.79133
O60443	GSDME	Gasdermin-E	54554.9	98465.1	371386	1.91524
O60447	EVI5	Ecotropic viral integration site 5 protein homolog	92948.8	11109.1	101361	3.18969
O60476	MAN1A2	Mannosyl-oligosaccharide 1,2-alpha-mannosidase IB	73003.6	2712.65	17518.1	2.69107
O60488	ACSL4	Long-chain-fatty-acid--CoA ligase 4	79188	136476	243861	0.837415
O60493	SNX3	Sorting nexin-3	18762.3	42728.3	61005.1	0.513736
O60499	STX10	Syntaxin-10	28114.1	4291.72	45096.4	3.39339
O60502	MGEA5	Protein O-GlcNAcase	102915	49480.7	113397	1.19644
O60504	SORBS3	Vinexin	75341.1	35124.1	109546	1.64101
O60506	SYNCRIP	Heterogeneous nuclear ribonucleoprotein Q	69602.6	66396.5	771335	3.53818
O60507	TPST1	Protein-tyrosine sulfotransferase 1	42188.4	5640.32	27376.3	2.27908
O60508	CDC40	Pre-mRNA-processing factor 17	65521.2	1729.67	177623	6.68217
O60518	RANBP6	Ran-binding protein 6	124714	1	10138.2	13.3075
O60524	NEMF	Nuclear export mediator factor NEMF	122954	14372.6	174567	3.60238
O60547	GMDS	GDP-mannose 4,6 dehydratase	41949.7	31999.5	84156.3	1.39502
O60551	NMT2	Glycylpeptide N-tetradecanoyltransferase 2	56980.2	3985.88	754345	7.56418
O60563	CCNT1	Cyclin-T1	80684.6	4072.66	117798	4.85421
O60566	BUB1B	Mitotic checkpoint serine/threonine-protein kinase BUB1 beta	119545	17698.7	207142	3.54891
O60568	PLOD3	Procollagen-lysine,2-oxoglutarate 5-dioxygenase 3	84785.1	157108	576510	1.87559
O60573	EIF4E2	Eukaryotic translation initiation factor 4E type 2	28362	4286.47	139465	5.02398
O60583	CCNT2	Cyclin-T2	81028.9	42749.8	126100	1.56058
O60603	TLR2	Toll-like receptor 2	89837.6	2375.55	15390.7	2.69573
O60610	DIAPH1	Protein diaphanous homolog 1	141347	241318	452141	0.905837
O60637	TSPAN3	Tetraspanin-3	28017.7	58615.3	157423	1.4253
O60645	EXOC3	Exocyst complex component 3	86844.8	23411.3	250751	3.42098
O60664	PLIN3	Perilipin-3	47075	124639	375714	1.59188
O60671	RAD1	Cell cycle checkpoint protein RAD1	31827.3	11033.6	66875.7	2.59958
O60678	PRMT3	Protein arginine N-methyltransferase 3	59876.1	67515.5	304569	2.17348
O60683	PEX10	Peroxisome biogenesis factor 10	37069.1	1	11138.7	13.4433
O60684	KPNA6	Importin subunit alpha-7	60029.5	366672	592539	0.692422
O60701	UGDH	UDP-glucose 6-dehydrogenase	55024.1	162098	486837	1.58657
O60704	TPST2	Protein-tyrosine sulfotransferase 2	41911.8	5985.61	18867.2	1.65631
O60716	CTNND1	Catenin delta-1	108170	60929.8	351955	2.53017
O60732	MAGEC1	Melanoma-associated antigen C1	123643	1	35030.4	15.0963
O60749	SNX2	Sorting nexin-2	58471.1	79387.9	514597	2.69645
O60762	DPM1	Dolichol-phosphate mannosyltransferase subunit 1	29634.3	52141.8	82662.1	0.664786
O60763	USO1	General vesicular transport factor p115	107895	116492	485531	2.05933
O60783	MRPS14	28S ribosomal protein S14, mitochondrial	15138.7	1	124974	16.9313
O60784	TOM1	Target of Myb protein 1	53818.4	14045	99759.7	2.8284
O60814;P57053;P58876;P62807;Q5QNW6;Q93079;Q99877;Q99879;Q99880	HIST1H2BK;H2BFS;HIST1H2BD;HIST1H2BC;HIST2H2BF;HIST1H2BH;HIST1H2BN;HIST1H2BM;HIST1H2BL	Histone H2B type 1-K;Histone H2B type F-S;Histone H2B type 1-D;Histone H2B type 1-C/E/F/G/I;Histone H2B type 2-F;Histone H2B type 1-H;Histone H2B type 1-N;Histone H2B type 1-M;Histone H2B type 1-L	13890.13;13944.19;13936.16;13906.13;13920.16;13892.11;13922.13;13989.27;13952.2	95540.4	4.16054e+06	5.44452
O60825	PFKFB2	6-phosphofructo-2-kinase/fructose-2,6-bisphosphatase 2	58476.8	17877.9	143551	3.00532
O60826	CCDC22	Coiled-coil domain-containing protein 22	70755.6	146316	847375	2.53391
O60828	PQBP1	Polyglutamine-binding protein 1	30472.2	18811.4	51020.9	1.43948
O60830	TIMM17B	Mitochondrial import inner membrane translocase subunit Tim17-B	18273	6873.69	25399.8	1.88566
O60831	PRAF2	PRA1 family protein 2	19257.9	1	114453	16.8044
O60832	DKC1	H/ACA ribonucleoprotein complex subunit 4	57674.1	2930.02	156528	5.73937
O60841	EIF5B	Eukaryotic translation initiation factor 5B	138827	296513	665162	1.16561
O60869	EDF1	Endothelial differentiation-related factor 1	16368.7	1	197429	17.591
O60870	KIN	DNA/RNA-binding protein KIN17	45373.7	20813.3	280632	3.7531
O60879	DIAPH2	Protein diaphanous homolog 2	125569	254648	90670.8	-1.48979
O60884	DNAJA2	DnaJ homolog subfamily A member 2	45745.6	115855	226970	0.970186
O60885	BRD4	Bromodomain-containing protein 4	152219	9339.11	183237	4.29428
O60890	OPHN1	Oligophrenin-1	91640.7	3219.51	17096.4	2.40878
O60907	TBL1X	F-box-like/WD repeat-containing protein TBL1X	62495.7	13012.9	374296	4.84617
O60921	HUS1	Checkpoint protein HUS1	31690.8	5054.73	24568.2	2.28109
O60925	PFDN1	Prefoldin subunit 1	14210.5	22782.4	41134.7	0.852437
O60930	RNASEH1	Ribonuclease H1	32064.2	2609.36	18947.6	2.86025
O60934	NBN	Nibrin	84959	20765.8	300793	3.85649
O60936	NOL3	Nucleolar protein 3	22629.5	1	21158.8	14.369
O60941	DTNB	Dystrobrevin beta	71355.6	12416	84207	2.76175
O60942	RNGTT	mRNA-capping enzyme	68556.7	5485.92	44732.3	3.02751
O75027	ABCB7	ATP-binding cassette sub-family B member 7, mitochondrial	82641.3	19626.7	62102	1.66182
O75030	MITF	Microphthalmia-associated transcription factor	58795.5	1	22862.9	14.4807
O75044	SRGAP2	SLIT-ROBO Rho GTPase-activating protein 2	120871	35638.4	132694	1.89659
O75052	NOS1AP	Carboxyl-terminal PDZ ligand of neuronal nitric oxide synthase protein	56149.8	12842.3	546384	5.41094
O75061	DNAJC6	Putative tyrosine-protein phosphatase auxilin	99996.5	1	21741.6	14.4082
O75072	FKTN	Fukutin	53723.9	1	11763.6	13.522
O75083	WDR1	WD repeat-containing protein 1	66193.5	200163	191650	-0.0626982
O75113	N4BP1	NEDD4-binding protein 1	100379	15880.3	63786.3	2.00601
O75116	ROCK2	Rho-associated protein kinase 2	160900	71208.8	162874	1.19362
O75122	CLASP2	CLIP-associating protein 2	141133	2715.03	84697	4.96327
O75127	PTCD1	Pentatricopeptide repeat-containing protein 1, mitochondrial	78855.7	8742.7	76790.4	3.13477
O75131	CPNE3	Copine-3	60130.6	41714.9	234185	2.48902
O75143	ATG13	Autophagy-related protein 13	56571.8	2306.2	11140	2.27216
O75146	HIP1R	Huntingtin-interacting protein 1-related protein	119388	3728.74	168452	5.4975
O75147	OBSL1	Obscurin-like protein 1	206947	4177.58	47849.8	3.51777
O75150	RNF40	E3 ubiquitin-protein ligase BRE1B	113650	8333.15	85736.9	3.36298
O75152	ZC3H11A	Zinc finger CCCH domain-containing protein 11A	89131.1	791.421	17882	4.49792
O75153	CLUH	Clustered mitochondria protein homolog	146670	29736	100039	1.75028
O75157	TSC22D2	TSC22 domain family protein 2	79228.2	6577.46	22348.9	1.7646
O75165	DNAJC13	DnaJ homolog subfamily C member 13	254415	1	6583.48	12.6846
O75170	PPP6R2	Serine/threonine-protein phosphatase 6 regulatory subunit 2	104942	3894.78	23217	2.57557
O75175	CNOT3	CCR4-NOT transcription complex subunit 3	81872	14286.1	154200	3.43211
O75179	ANKRD17	Ankyrin repeat domain-containing protein 17	274258	16620.2	469186	4.81915
O75190	DNAJB6	DnaJ homolog subfamily B member 6	36087	36582.7	164531	2.16913
O75197	LRP5	Low-density lipoprotein receptor-related protein 5	179145	3248.34	33071.7	3.34782
O75223	GGCT	Gamma-glutamylcyclotransferase	21007.7	27667	38752.5	0.486125
O75251	NDUFS7	NADH dehydrogenase [ubiquinone] iron-sulfur protein 7, mitochondrial	23563.5	13496.3	14310.9	0.0845503
O75298	RTN2	Reticulon-2	59263.8	1	76792.8	16.2287
O75306	NDUFS2	NADH dehydrogenase [ubiquinone] iron-sulfur protein 2, mitochondrial	52545.6	62389.4	707932	3.50424
O75312	ZPR1	Zinc finger protein ZPR1	50925.3	14841.2	1	-13.8573
O75323	NIPSNAP2	Protein NipSnap homolog 2	33742.6	42408.4	140710	1.7303
O75326	SEMA7A	Semaphorin-7A	74823.8	2387.77	5807.65	1.28229
O75340	PDCD6	Programmed cell death protein 6	21868.5	54485.7	2.37991e+06	5.44889
O75351	VPS4B	Vacuolar protein sorting-associated protein 4B	49302.1	205868	695314	1.75594
O75352	MPDU1	Mannose-P-dolichol utilization defect 1 protein	26637.8	15797.7	191629	3.60053
O75369	FLNB	Filamin-B	278164	527128	1.01147e+06	0.940225
O75376	NCOR1	Nuclear receptor corepressor 1	270210	3391.55	116638	5.10395
O75379	VAMP4	Vesicle-associated membrane protein 4	16396.8	1	27026.3	14.7221
O75381	PEX14	Peroxisomal membrane protein PEX14	41236.6	7146.46	365137	5.67506
O75382	TRIM3	Tripartite motif-containing protein 3	80829.5	5866.11	30790.1	2.39199
O75386	TULP3	Tubby-related protein 3	49642.1	5801.84	29586.3	2.35035
O75390	CS	Citrate synthase, mitochondrial	51712.4	35476.3	41246.5	0.217415
O75391	SPAG7	Sperm-associated antigen 7	26034.4	29383.5	10312.7	-1.51058
O75396	SEC22B	Vesicle-trafficking protein SEC22b	24593.3	69386.9	53186.1	-0.383614
O75400	PRPF40A	Pre-mRNA-processing factor 40 homolog A	108805	78386.7	527563	2.75066
O75410	TACC1	Transforming acidic coiled-coil-containing protein 1	87794.3	20451	155849	2.92991
O75414	NME6	Nucleoside diphosphate kinase 6	21142.2	1	13652.5	13.7369
O75419	CDC45	Cell division control protein 45 homolog	65568.6	3113.08	27420.4	3.13884
O75420	GIGYF1	GRB10-interacting GYF protein 1	114601	2720.58	25718.2	3.2408
O75427	LRCH4	Leucine-rich repeat and calponin homology domain-containing protein 4	73450.3	14159	219344	3.9534
O75436	VPS26A	Vacuolar protein sorting-associated protein 26A	38169.9	1.58317e+06	791418	-1.0003
O75439	PMPCB	Mitochondrial-processing peptidase subunit beta	54366.1	11833.6	26389.9	1.1571
O75446	SAP30	Histone deacetylase complex subunit SAP30	23306.2	4842.94	34958.4	2.85169
O75448	MED24	Mediator of RNA polymerase II transcription subunit 24	110305	21892.5	449848	4.36093
O75449	KATNA1	Katanin p60 ATPase-containing subunit A1	55964.8	9979.34	107934	3.43507
O75477	ERLIN1	Erlin-1	38925.8	66570.4	134257	1.01204
O75489	NDUFS3	NADH dehydrogenase [ubiquinone] iron-sulfur protein 3, mitochondrial	30241.5	36759.7	140545	1.93484
O75494	SRSF10	Serine/arginine-rich splicing factor 10	31300.5	2268.42	1.30987e+06	9.17352
O75496	GMNN	Geminin	23565.1	10678.9	70238.8	2.71751
O75521	ECI2	Enoyl-CoA delta isomerase 2, mitochondrial	43585.1	17794.2	72583.5	2.02823
O75530	EED	Polycomb protein EED	50197.7	5815.31	34450.2	2.56658
O75531	BANF1	Barrier-to-autointegration factor	10058.6	146018	264081	0.854841
O75533	SF3B1	Splicing factor 3B subunit 1	145830	20154.6	251040	3.63873
O75534	CSDE1	Cold shock domain-containing protein E1	88884.7	109025	387993	1.83137
O75569	PRKRA	Interferon-inducible double-stranded RNA-dependent protein kinase activator A	34404.2	16414.3	122006	2.89393
O75582	RPS6KA5	Ribosomal protein S6 kinase alpha-5	89865.4	25998.2	145390	2.48344
O75586	MED6	Mediator of RNA polymerase II transcription subunit 6	28424.6	4256.4	75351.7	4.14593
O75592	MYCBP2	E3 ubiquitin-protein ligase MYCBP2	510084	1	20998.1	14.358
O75600	GCAT	2-amino-3-ketobutyrate coenzyme A ligase, mitochondrial	45285.1	4855.42	1	-12.2454
O75607	NPM3	Nucleoplasmin-3	19343.7	1	72366.2	16.143
O75616	ERAL1	GTPase Era, mitochondrial	48350.1	30378.1	120593	1.98904
O75643	SNRNP200	U5 small nuclear ribonucleoprotein 200 kDa helicase	244508	10593.5	510871	5.5917
O75663	TIPRL	TIP41-like protein	31444	125702	60058.8	-1.06556
O75674	TOM1L1	TOM1-like protein 1	52988.8	8715.32	8481.32	-0.0392649
O75676	RPS6KA4	Ribosomal protein S6 kinase alpha-4	85605.8	18797.5	110129	2.55058
O75683	SURF6	Surfeit locus protein 6	41450.4	1	16423.1	14.0034
O75694	NUP155	Nuclear pore complex protein Nup155	155199	57743.7	201370	1.80211
O75695	RP2	Protein XRP2	39641.1	11424.7	4327.77	-1.40046
O75717	WDHD1	WD repeat and HMG-box DNA-binding protein 1	125967	57573.5	102436	0.831241
O75718	CRTAP	Cartilage-associated protein	46561.9	253340	324861	0.358751
O75746	SLC25A12	Calcium-binding mitochondrial carrier protein Aralar1	74761.9	22143.9	128087	2.53215
O75764	TCEA3	Transcription elongation factor A protein 3	38971.7	25714.4	129232	2.32931
O75771	RAD51D	DNA repair protein RAD51 homolog 4	35049.3	1	15836.4	13.951
O75787	ATP6AP2	Renin receptor	39008	26648.2	200088	2.90853
O75792	RNASEH2A	Ribonuclease H2 subunit A	33394.9	16229.4	28719	0.823399
O75794	CDC123	Cell division cycle protein 123 homolog	39134.8	56248.7	140666	1.32238
O75808	CAPN15	Calpain-15	117314	1154.66	1	-10.1733
O75815	BCAR3	Breast cancer anti-estrogen resistance protein 3	92565.5	27731.4	264118	3.25159
O75817	POP7	Ribonuclease P protein subunit p20	15650.9	1	32340.3	14.981
O75818	RPP40	Ribonuclease P protein subunit p40	41833.9	6137.21	8025.98	0.387095
O75821	EIF3G	Eukaryotic translation initiation factor 3 subunit G	35611	179708	765463	2.09068
O75822	EIF3J	Eukaryotic translation initiation factor 3 subunit J	29062.4	14592.6	120995	3.05164
O75828	CBR3	Carbonyl reductase [NADPH] 3	30850.2	2.43924e+07	3.83557e+07	0.653009
O75832	PSMD10	26S proteasome non-ATPase regulatory subunit 10	24427.8	58353	32676.7	-0.836543
O75843	AP1G2	AP-1 complex subunit gamma-like 2	87116.6	30289.1	179951	2.57073
O75844	ZMPSTE24	CAAX prenyl protease 1 homolog	54812.9	8353.47	5533.25	-0.594249
O75864	PPP1R37	Protein phosphatase 1 regulatory subunit 37	74767.3	18405.5	114488	2.63699
O75874	IDH1	Isocitrate dehydrogenase [NADP] cytoplasmic	46659.3	18105.3	16527.5	-0.131538
O75879	GATB	Glutamyl-tRNA(Gln) amidotransferase subunit B, mitochondrial	61864	20167.2	36289.8	0.847554
O75880	SCO1	Protein SCO1 homolog, mitochondrial	33814	29910	32768.9	0.131698
O75884	RBBP9	Putative hydrolase RBBP9	20999.9	1	3665.5	11.8398
O75886	STAM2	Signal transducing adapter molecule 2	58164.2	8386.06	33759.2	2.00922
O75909	CCNK	Cyclin-K	64239.8	58338.7	413761	2.82627
O75915	ARL6IP5	PRA1 family protein 3	21614.7	168526	409721	1.28167
O75923	DYSF	Dysferlin	237295	14680.9	45972.1	1.64682
O75925	PIAS1	E3 SUMO-protein ligase PIAS1	71836	1994.79	19222.9	3.26852
O75928	PIAS2	E3 SUMO-protein ligase PIAS2	68240.4	9357.74	43896.1	2.22986
O75934	BCAS2	Pre-mRNA-splicing factor SPF27	26131.4	6094.87	92060.1	3.91691
O75935	DCTN3	Dynactin subunit 3	21119.4	21431	62703.4	1.54885
O75937	DNAJC8	DnaJ homolog subfamily C member 8	29841.7	29368.6	21946.6	-0.420276
O75940	SMNDC1	Survival of motor neuron-related-splicing factor 30	26711.1	24307.9	134398	2.46701
O75943	RAD17	Cell cycle checkpoint protein RAD17	77054.8	4439.48	37148	3.06482
O75947	ATP5H	ATP synthase subunit d, mitochondrial	18491.2	11589.9	65476.4	2.4981
O75955	FLOT1	Flotillin-1	47355.3	60351.6	120668	0.99958
O75962	TRIO	Triple functional domain protein	346900	4540.65	93507.5	4.36411
O75964	ATP5L	ATP synthase subunit g, mitochondrial	11428.5	510729	3.75888e+06	2.87967
O75970	MPDZ	Multiple PDZ domain protein	221618	4717.41	48244.4	3.3543
O75976	CPD	Carboxypeptidase D	152931	61339.2	122646	0.999622
O76003	GLRX3	Glutaredoxin-3	37432	44877.8	173233	1.94864
O76009	KRT33A	Keratin, type I cuticular Ha3-I	45940.3	1	76089.4	16.2154
O76011	KRT34	Keratin, type I cuticular Ha4	49423.6	26756.5	65781.4	1.29779
O76013	KRT36	Keratin, type I cuticular Ha6	52247.1	53402.1	605648	3.50351
O76021	RSL1D1	Ribosomal L1 domain-containing protein 1	54972.5	3156.94	444698	7.13815
O76031	CLPX	ATP-dependent Clp protease ATP-binding subunit clpX-like, mitochondrial	69223.7	93073.2	370509	1.99307
O76071	CIAO1	Probable cytosolic iron-sulfur protein assembly protein CIAO1	37840	17294.8	220984	3.67553
O76094	SRP72	Signal recognition particle subunit SRP72	74606.2	39645.6	297595	2.90812
O94760	DDAH1	N(G),N(G)-dimethylarginine dimethylaminohydrolase 1	31121.8	11466.8	34351.6	1.58291
O94762	RECQL5	ATP-dependent DNA helicase Q5	108858	21962.2	475451	4.4362
O94763	URI1	Unconventional prefoldin RPB5 interactor 1	59832.2	11793	319520	4.75991
O94766	B3GAT3	Galactosylgalactosylxylosylprotein 3-beta-glucuronosyltransferase 3	37121.8	17849.7	215085	3.59094
O94776	MTA2	Metastasis-associated protein MTA2	75023.1	13640.9	233796	4.09924
O94804	STK10	Serine/threonine-protein kinase 10	112135	27452.7	56674.5	1.04575
O94806	PRKD3	Serine/threonine-protein kinase D3	100471	5146.17	176982	5.10396
O94808	GFPT2	Glutamine--fructose-6-phosphate aminotransferase [isomerizing] 2	76930.6	303427	981018	1.69293
O94817	ATG12	Ubiquitin-like protein ATG12	15113.2	8869.04	14243.5	0.683458
O94819	KBTBD11	Kelch repeat and BTB domain-containing protein 11	65719.9	10001.2	83721.4	3.06542
O94822	LTN1	E3 ubiquitin-protein ligase listerin	200552	1	20511.1	14.3241
O94826	TOMM70	Mitochondrial import receptor subunit TOM70	67454.8	165004	190923	0.210489
O94829	IPO13	Importin-13	108195	279.585	33437.3	6.90203
O94830	DDHD2	Phospholipase DDHD2	81031.8	7785.02	12958.1	0.735082
O94842	TOX4	TOX high mobility group box family member 4	66194.8	2281.47	85220.8	5.22317
O94851	MICAL2	[F-actin]-monooxygenase MICAL2	126689	1004.43	47960.6	5.5774
O94855	SEC24D	Protein transport protein Sec24D	113010	15626.3	68823.2	2.13892
O94864	SUPT7L	STAGA complex 65 subunit gamma	46192.8	14786.9	344294	4.54125
O94868	FCHSD2	F-BAR and double SH3 domains protein 2	84276.4	4799.95	146151	4.9283
O94874	UFL1	E3 UFM1-protein ligase 1	89595.3	8306.31	130783	3.97683
O94875	SORBS2	Sorbin and SH3 domain-containing protein 2	124108	19644.7	1.83603e+06	6.54631
O94885	SASH1	SAM and SH3 domain-containing protein 1	136653	1654.75	75210.8	5.50625
O94886	TMEM63A	CSC1-like protein 1	92126.2	671227	1.07812e+06	0.683642
O94887	FARP2	FERM, ARHGEF and pleckstrin domain-containing protein 2	119888	2927.98	86671.4	4.88758
O94888	UBXN7	UBX domain-containing protein 7	54862.3	24344.5	177782	2.86844
O94900	TOX	Thymocyte selection-associated high mobility group box protein TOX	57512.8	1	5507.01	12.4271
O94903	PLPBP	Pyridoxal phosphate homeostasis protein	30343.9	35417	13888.6	-1.35054
O94905	ERLIN2	Erlin-2	37839.5	13148.9	21815.3	0.730398
O94906	PRPF6	Pre-mRNA-processing factor 6	106925	64982	1.38754e+06	4.41634
O94913	PCF11	Pre-mRNA cleavage complex 2 protein Pcf11	173050	2434.66	86844.3	5.15664
O94915	FRYL	Protein furry homolog-like	339598	1032.44	38760.8	5.23047
O94916	NFAT5	Nuclear factor of activated T-cells 5	165763	2797.85	11103.8	1.98866
O94923	GLCE	D-glucuronyl C5-epimerase	70101	6580.91	24086.5	1.87187
O94925	GLS	Glutaminase kidney isoform, mitochondrial	73461.1	158048	357813	1.17884
O94927	HAUS5	HAUS augmin-like complex subunit 5	71682.5	63919.9	375182	2.55326
O94929	ABLIM3	Actin-binding LIM protein 3	77801.6	3812.22	95608.2	4.64843
O94952	FBXO21	F-box only protein 21	72270.1	12931.4	13134.6	0.0224916
O94955	RHOBTB3	Rho-related BTB domain-containing protein 3	69413.4	12352.7	48822.6	1.98272
O94964	SOGA1	Protein SOGA1	159760	1347.53	35199.3	4.70716
O94966	USP19	Ubiquitin carboxyl-terminal hydrolase 19	145651	21381.9	297363	3.79776
O94967	WDR47	WD repeat-containing protein 47	101949	3446.04	105351	4.93412
O94973	AP2A2	AP-2 complex subunit alpha-2	103960	134808	1.89343e+06	3.81202
O94979	SEC31A	Protein transport protein Sec31A	133015	172439	338622	0.973591
O94992	HEXIM1	Protein HEXIM1	40623.4	48084.8	407059	3.08158
O95059	RPP14	Ribonuclease P protein subunit p14	13693	1	270223	18.0438
O95067	CCNB2	G2/mitotic-specific cyclin-B2	45281.6	1	47106.4	15.5236
O95070	YIF1A	Protein YIF1A	32011.2	1658.52	45073	4.76429
O95071	UBR5	E3 ubiquitin-protein ligase UBR5	309352	2670.97	60722.9	4.5068
O95084	PRSS23	Serine protease 23	43001.2	1	2386.54	11.2207
O95104	SCAF4	Splicing factor, arginine/serine-rich 15	125869	1	129409	16.9816
O95139	NDUFB6	NADH dehydrogenase [ubiquinone] 1 beta subcomplex subunit 6	15489.2	1	19891.9	14.2799
O95140	MFN2	Mitofusin-2	86402.1	12805.5	53784.1	2.07042
O95147	DUSP14	Dual specificity protein phosphatase 14	22254.9	1	77216.9	16.2366
O95149	SNUPN	Snurportin-1	41142.5	31186.5	21836.5	-0.51418
O95155	UBE4B	Ubiquitin conjugation factor E4 B	146185	10184.3	108310	3.41076
O95159	ZFPL1	Zinc finger protein-like 1	34114	43882.5	86297.5	0.975672
O95163	ELP1	Elongator complex protein 1	150254	329870	981391	1.57293
O95166	GABARAP	Gamma-aminobutyric acid receptor-associated protein	13918	1	6844.45	12.7407
O95168	NDUFB4	NADH dehydrogenase [ubiquinone] 1 beta subcomplex subunit 4	15208.6	15424.5	71176.3	2.20617
O95182	NDUFA7	NADH dehydrogenase [ubiquinone] 1 alpha subcomplex subunit 7	12551.4	1	7968.4	12.9601
O95197	RTN3	Reticulon-3	112611	176612	1.01522e+06	2.52314
O95198	KLHL2	Kelch-like protein 2	65974.6	1	6665.09	12.7024
O95202	LETM1	Mitochondrial proton/calcium exchanger protein	83354.2	18682.1	333193	4.15663
O95210	STBD1	Starch-binding domain-containing protein 1	39007.3	9686.9	1	-13.2418
O95218	ZRANB2	Zinc finger Ran-binding domain-containing protein 2	37404.4	1	76053	16.2147
O95219	SNX4	Sorting nexin-4	51908.8	32284.7	106451	1.72126
O95232	LUC7L3	Luc7-like protein 3	51466.1	7148.69	321222	5.48975
O95235	KIF20A	Kinesin-like protein KIF20A	100278	1	7046.1	12.7826
O95239	KIF4A	Chromosome-associated kinesin KIF4A	139881	8593.81	100827	3.55244
O95248	SBF1	Myotubularin-related protein 5	208315	4.02367e+07	14713693	-1.45135
O95249	GOSR1	Golgi SNAP receptor complex member 1	28612.6	9861.44	42085.1	2.09344
O95251	KAT7	Histone acetyltransferase KAT7	70642.4	2221.52	657670	8.20967
O95260	ATE1	Arginyl-tRNA--protein transferase 1	59090.2	5431.89	15452.9	1.50835
O95271	TNKS	Tankyrase-1	142039	952.008	194656	7.67574
O95273	CCNDBP1	Cyclin-D1-binding protein 1	40262	6888.21	1	-12.7499
O95278	EPM2A	Laforin	37157.6	82925.5	6052.53	-3.7762
O95292	VAPB	Vesicle-associated membrane protein-associated protein B/C	27228.4	7514.35	17224.3	1.19673
O95295	SNAPIN	SNARE-associated protein Snapin	14874	6713.13	29234.3	2.1226
O95297	MPZL1	Myelin protein zero-like protein 1	29082.2	6972.41	5681.68	-0.29534
O95298	NDUFC2	NADH dehydrogenase [ubiquinone] 1 subunit C2	14187.5	1	22779.6	14.4755
O95299	NDUFA10	NADH dehydrogenase [ubiquinone] 1 alpha subcomplex subunit 10, mitochondrial	40750.6	87990.5	112175	0.350335
O95302	FKBP9	Peptidyl-prolyl cis-trans isomerase FKBP9	63083.6	11219.9	35615.4	1.66644
O95336	PGLS	6-phosphogluconolactonase	27546.9	171102	343268	1.00448
O95340	PAPSS2	Bifunctional 3'-phosphoadenosine 5'-phosphosulfate synthase 2	69500.7	270097	973405	1.84956
O95347	SMC2	Structural maintenance of chromosomes protein 2	135656	139882	822767	2.55627
O95352	ATG7	Ubiquitin-like modifier-activating enzyme ATG7	77959.6	9080.24	69784.1	2.9421
O95359	TACC2	Transforming acidic coiled-coil-containing protein 2	309427	164503	681907	2.05146
O95361	TRIM16	Tripartite motif-containing protein 16	63955.2	16774.4	79821.6	2.25052
O95363	FARS2	Phenylalanine--tRNA ligase, mitochondrial	52356.5	13813	49352.6	1.8371
O95365	ZBTB7A	Zinc finger and BTB domain-containing protein 7A	61439.1	1	14523.6	13.8261
O95373	IPO7	Importin-7	119517	137400	541096	1.97751
O95376	ARIH2	E3 ubiquitin-protein ligase ARIH2	57818.9	6261.57	29132.3	2.21802
O95382	MAP3K6	Mitogen-activated protein kinase kinase kinase 6	142596	1	0.408955	-1.28999
O95391	SLU7	Pre-mRNA-splicing factor SLU7	68386.7	1714.37	55930.8	5.02789
O95394	PGM3	Phosphoacetylglucosamine mutase	59851.9	273045	965182	1.82166
O95396	MOCS3	Adenylyltransferase and sulfurtransferase MOCS3	49669.3	11909.4	26001.8	1.12651
O95397;Q96JA3	PLEKHA8P1;PLEKHA8	Putative protein PLEKHA9;Pleckstrin homology domain-containing family A member 8	43538.71;58261.33	1698.17	32919.1	4.27687
O95400	CD2BP2	CD2 antigen cytoplasmic tail-binding protein 2	37646.5	11584	342566	4.88617
O95402	MED26	Mediator of RNA polymerase II transcription subunit 26	65446.4	2062.61	148714	6.17192
O95405	ZFYVE9	Zinc finger FYVE domain-containing protein 9	156403	5221.91	60946.4	3.54489
O95425	SVIL	Supervillin	247746	3496.37	11980.7	1.77678
O95429	BAG4	BAG family molecular chaperone regulator 4	49594.1	11567.2	328682	4.82859
O95433	AHSA1	Activator of 90 kDa heat shock protein ATPase homolog 1	38274.3	52017.9	192571	1.88831
O95453	PARN	Poly(A)-specific ribonuclease PARN	73451	9204.82	27719.7	1.59045
O95456	PSMG1	Proteasome assembly chaperone 1	32853.9	19537.1	22091.2	0.17726
O95461	LARGE1	LARGE xylosyl- and glucuronyltransferase 1	88066	1	31985.3	14.9651
O95466	FMNL1	Formin-like protein 1	121854	60195.6	219517	1.8666
O95470	SGPL1	Sphingosine-1-phosphate lyase 1	63523.8	37664.3	540105	3.84197
O95478	NSA2	Ribosome biogenesis protein NSA2 homolog	30065.5	1	25729.5	14.6511
O95486	SEC24A	Protein transport protein Sec24A	119749	17068.4	54938.6	1.6865
O95487	SEC24B	Protein transport protein Sec24B	137418	40622.1	471571	3.53714
O95503;Q9HC52	CBX6;CBX8	Chromobox protein homolog 6;Chromobox protein homolog 8	43898.34;43395.72	66437.8	1	-16.0197
O95551	TDP2	Tyrosyl-DNA phosphodiesterase 2	40929.6	6207	13562.2	1.12762
O95563	MPC2	Mitochondrial pyruvate carrier 2	14278.9	1060.61	55242.2	5.7028
O95573	ACSL3	Long-chain-fatty-acid--CoA ligase 3	80420.1	58556.2	371903	2.66703
O95602	POLR1A	DNA-directed RNA polymerase I subunit RPA1	194811	4418.35	60432.2	3.77374
O95619	YEATS4	YEATS domain-containing protein 4	26499.5	1	22313.6	14.4456
O95630	STAMBP	STAM-binding protein	48076.9	54075.6	43089.1	-0.327656
O95639	CPSF4	Cleavage and polyadenylation specificity factor subunit 4	30254.8	377.532	16550.1	5.45409
O95644	NFATC1	Nuclear factor of activated T-cells, cytoplasmic 1	101243	1	219232	17.7421
O95671	ASMTL	N-acetylserotonin O-methyltransferase-like protein	68856.7	29054.7	285633	3.29732
O95674	CDS2	Phosphatidate cytidylyltransferase 2	51418	23402.4	87854.7	1.90846
O95677	EYA4	Eyes absent homolog 4	69505.1	1	6664.08	12.7022
O95684	FGFR1OP	FGFR1 oncogene partner	43064.9	8227.03	22175.7	1.43054
O95685	PPP1R3D	Protein phosphatase 1 regulatory subunit 3D	32559.1	13238.4	23237.2	0.811705
O95707	POP4	Ribonuclease P protein subunit p29	25424.7	1	59746.8	15.8666
O95721	SNAP29	Synaptosomal-associated protein 29	28970.3	15669.6	58520.4	1.90097
O95747	OXSR1	Serine/threonine-protein kinase OSR1	58022.2	439019	1.24743e+06	1.50661
O95757	HSPA4L	Heat shock 70 kDa protein 4L	94512.5	28781.7	158352	2.45991
O95758	PTBP3	Polypyrimidine tract-binding protein 3	59689.6	13311.2	79647.8	2.581
O95772	STARD3NL	STARD3 N-terminal-like protein	26654.6	11714.7	6772.36	-0.790591
O95777	LSM8	U6 snRNA-associated Sm-like protein LSm8	10402.6	5482.28	48046.8	3.13159
O95782	AP2A1	AP-2 complex subunit alpha-1	107546	101787	1.82293e+06	4.16264
O95786	DDX58	Probable ATP-dependent RNA helicase DDX58	106600	22498.7	135851	2.59411
O95793	STAU1	Double-stranded RNA-binding protein Staufen homolog 1	63182.3	120653	790888	2.71261
O95801	TTC4	Tetratricopeptide repeat protein 4	44678.5	14377.2	33522.3	1.22133
O95810	CAVIN2	Caveolae-associated protein 2	47173.2	109061	1.51193e+06	3.79319
O95816	BAG2	BAG family molecular chaperone regulator 2	23771.9	56899.5	55223.4	-0.0431368
O95817	BAG3	BAG family molecular chaperone regulator 3	61594.7	50143.1	269201	2.42456
O95819	MAP4K4	Mitogen-activated protein kinase kinase kinase kinase 4	142101	4328.78	49651.6	3.51981
O95822	MLYCD	Malonyl-CoA decarboxylase, mitochondrial	55003.4	18614.2	15931.4	-0.224533
O95825	CRYZL1	Quinone oxidoreductase-like protein 1	38696.5	24002.8	26891.9	0.163969
O95831	AIFM1	Apoptosis-inducing factor 1, mitochondrial	66900.6	119236	513514	2.10658
O95833	CLIC3	Chloride intracellular channel protein 3	26648.5	77455.7	37437.5	-1.04889
O95834	EML2	Echinoderm microtubule-associated protein-like 2	70678.8	15903.9	19961.6	0.327849
O95835	LATS1	Serine/threonine-protein kinase LATS1	126870	8456.87	176119	4.38028
O95861	BPNT1	3'(2'),5'-bisphosphate nucleotidase 1	33392.3	98010.8	65575.5	-0.579783
O95864	FADS2	Fatty acid desaturase 2	52259.4	2647.79	26082.3	3.30021
O95865	DDAH2	N(G),N(G)-dimethylarginine dimethylaminohydrolase 2	29643.9	67080.4	29169	-1.20145
O95870	ABHD16A	Protein ABHD16A	63243.3	15882	124237	2.96763
O95900	TRUB2	Mitochondrial mRNA pseudouridine synthase TRUB2	36694.4	3922.04	1	-11.9374
O95905	ECD	Protein ecdysoneless homolog	72758.1	8914.17	193231	4.43808
O95926	SYF2	Pre-mRNA-splicing factor SYF2	28722.4	1072.84	9066.51	3.07912
O95969	SCGB1D2	Secretoglobin family 1D member 2	9925.06	18093.3	7571.94	-1.25672
O95983	MBD3	Methyl-CpG-binding domain protein 3	32844.1	2172.37	48619	4.48418
O95985	TOP3B	DNA topoisomerase 3-beta-1	96662	2212.69	89362.1	5.33579
O95999	BCL10	B-cell lymphoma/leukemia 10	26251.6	27391.4	13924	-0.976152
O96000	NDUFB10	NADH dehydrogenase [ubiquinone] 1 beta subcomplex subunit 10	20776.7	374.318	30103.3	6.32951
O96005	CLPTM1	Cleft lip and palate transmembrane protein 1	76096.7	21045.2	65696.7	1.64233
O96006	ZBED1	Zinc finger BED domain-containing protein 1	78155.6	2199.88	11868.4	2.43163
O96007	MOCS2	Molybdopterin synthase catalytic subunit	20944	8798.05	15144.4	0.78353
O96008	TOMM40	Mitochondrial import receptor subunit TOM40 homolog	37893.1	7149.62	44342.2	2.63274
O96011	PEX11B	Peroxisomal membrane protein 11B	28431.3	1	25563.7	14.6418
O96013	PAK4	Serine/threonine-protein kinase PAK 4	64072.1	59128.4	253453	2.0998
O96017	CHEK2	Serine/threonine-protein kinase Chk2	60914.8	1	20493.7	14.3229
O96018	APBA3	Amyloid-beta A4 precursor protein-binding family A member 3	61454.1	10451.5	479097	5.51854
O96019	ACTL6A	Actin-like protein 6A	47461	19393.9	67638.2	1.80224
O96028	NSD2	Histone-lysine N-methyltransferase NSD2	152258	1	10593.9	13.3709
O96033	MOCS2	Molybdopterin synthase sulfur carrier subunit	9755.31	26192.6	14082.3	-0.895276
P00338	LDHA	L-lactate dehydrogenase A chain	36688.7	3.08218e+06	5.4455e+06	0.821115
P00367	GLUD1	Glutamate dehydrogenase 1, mitochondrial	61397.9	40746.5	375254	3.20312
P00374	DHFR	Dihydrofolate reductase	21452.7	19238.6	53130.6	1.46554
P00387	CYB5R3	NADH-cytochrome b5 reductase 3	34234.8	16582.8	232505	3.80951
P00390	GSR	Glutathione reductase, mitochondrial	56257	58234.2	104255	0.840181
P00403	MT-CO2	Cytochrome c oxidase subunit 2	25565	8313.52	8830.99	0.0871165
P00450	CP	Ceruloplasmin	122205	18811.2	64178.2	1.77049
P00491	PNP	Purine nucleoside phosphorylase	32117.9	11501.5	7612.92	-0.595299
P00492	HPRT1	Hypoxanthine-guanine phosphoribosyltransferase	24579.4	181512	75663.8	-1.26239
P00505	GOT2	Aspartate aminotransferase, mitochondrial	47517.7	24281.5	39302.1	0.69475
P00519	ABL1	Tyrosine-protein kinase ABL1	122873	1	5250.79	12.3583
P00533	EGFR	Epidermal growth factor receptor	134277	149964	490997	1.7111
P00558	PGK1	Phosphoglycerate kinase 1	44614.7	386895	127470	-1.60178
P00568	AK1	Adenylate kinase isoenzyme 1	21634.8	27056.7	84827.2	1.64854
P00734	F2	Prothrombin	70036.9	17973.3	1	-14.1336
P00738	HP	Haptoglobin	45205.3	80397	40047	-1.00545
P00747	PLG	Plasminogen	90569	7319.08	1	-12.8374
P00749	PLAU	Urokinase-type plasminogen activator	48507.4	13089.4	57390.2	2.13241
P00750	PLAT	Tissue-type plasminogen activator	62917.1	4508.26	72976.7	4.01679
P00751	CFB	Complement factor B	85532.9	5698.25	1	-12.4763
P00846	MT-ATP6	ATP synthase subunit a	24817.2	34931.7	166079	2.24926
P00966	ASS1	Argininosuccinate synthase	46530.4	102032	340819	1.73998
P01008	SERPINC1	Antithrombin-III	52602.4	15423.3	29668.6	0.943824
P01009	SERPINA1	Alpha-1-antitrypsin	46736.6	76229.5	49855.8	-0.612588
P01011	SERPINA3	Alpha-1-antichymotrypsin	47650.9	29029.3	10353.1	-1.48744
P01023	A2M	Alpha-2-macroglobulin	163291	67277.6	45342.5	-0.569261
P01024	C3	Complement C3	187148	117367	106197	-0.144286
P01033	TIMP1	Metalloproteinase inhibitor 1	23170.9	33469.6	95147.4	1.50731
P01034	CST3	Cystatin-C	15799.2	1	32395.8	14.9835
P01040	CSTA	Cystatin-A	11006.5	14309.3	23788.4	0.733309
P01106	MYC	Myc proto-oncogene protein	48804.1	1	12615.5	13.6229
P01111;P01112;P01116	NRAS;HRAS;KRAS	GTPase NRas;GTPase HRas;GTPase KRas	21229.16;21298.13;21655.82	1	49923.6	15.6074
P01130	LDLR	Low-density lipoprotein receptor	95376	65458.8	176254	1.429
P01137	TGFB1	Transforming growth factor beta-1	44341.2	15398.4	50307.1	1.70798
P01583	IL1A	Interleukin-1 alpha	30606.6	11764.3	13787	0.228895
P01834;P0DOX7	IGKC;	Immunoglobulin kappa constant;Immunoglobulin kappa light chain	11765.04;23379.07	297788	101998	-1.54574
P01857;P0DOX5	IGHG1;	Immunoglobulin heavy constant gamma 1;Immunoglobulin gamma-1 heavy chain	36105.91;NaN	181076	136530	-0.407379
P01859	IGHG2	Immunoglobulin heavy constant gamma 2	35900.6	76289.4	8610.19	-3.14737
P01871;P0DOX6	IGHM;	Immunoglobulin heavy constant mu;Immunoglobulin mu heavy chain	49439.74;NaN	143360	203329	0.504169
P01876	IGHA1	Immunoglobulin heavy constant alpha 1	37654.6	31855.4	45473.6	0.513488
P01892	HLA-A	HLA class I histocompatibility antigen, A-2 alpha chain	40921.8	1.05287e+06	1.09847e+06	0.061169
P01903	HLA-DRA	HLA class II histocompatibility antigen, DR alpha chain	28606.9	5774.59	13642	1.24027
P02461	COL3A1	Collagen alpha-1(III) chain	138564	13833	19286.9	0.479502
P02533	KRT14	Keratin, type I cytoskeletal 14	51561.5	14613375	9.04858e+06	-0.691527
P02538	KRT6A	Keratin, type II cytoskeletal 6A	60044.9	5.63471e+06	5.05978e+06	-0.155266
P02545	LMNA	Prelamin-A/C	74139.5	270501	1.3525e+06	2.32193
P02647	APOA1	Apolipoprotein A-I	30777.8	276049	182720	-0.595292
P02652	APOA2	Apolipoprotein A-II	11175	1.30639e+06	632201	-1.04713
P02675	FGB	Fibrinogen beta chain	55928.2	11152.5	11412.7	0.0332812
P02679	FGG	Fibrinogen gamma chain	51511.7	23231.2	34268.6	0.560826
P02745	C1QA	Complement C1q subcomponent subunit A	26016.6	1362.13	1	-10.4116
P02748	C9	Complement component C9	63173.4	1	19613	14.2595
P02751	FN1	Fibronectin	262625	5260.66	7319.72	0.476545
P02753	RBP4	Retinol-binding protein 4	23010	13115.2	1	-13.6789
P02763	ORM1	Alpha-1-acid glycoprotein 1	23511.6	28623.1	1	-14.8049
P02765	AHSG	Alpha-2-HS-glycoprotein	39324.7	22767.2	81387.5	1.83785
P02766	TTR	Transthyretin	15887	27112	5899.94	-2.20016
P02768	ALB	Serum albumin	69366.7	674860	495253	-0.446423
P02786	TFRC	Transferrin receptor protein 1	84871.4	357380	761106	1.09064
P02787	TF	Serotransferrin	77063.9	78704.2	57456	-0.453983
P02788	LTF	Lactotransferrin	78181.9	44082.6	11524.7	-1.93548
P02790	HPX	Hemopexin	51676.4	41053.4	25619.5	-0.680261
P02792	FTL	Ferritin light chain	20019.7	966.445	43526.4	5.49306
P02794	FTH1	Ferritin heavy chain	21225.6	10867.7	128693	3.56581
P02795;P04732;P13640;P80297;Q8N339	MT2A;MT1E;MT1G;MT1X;MT1M	Metallothionein-2;Metallothionein-1E;Metallothionein-1G;Metallothionein-1X;Metallothionein-1M	6042.16;6014.15;6141.34;6068.24;6110.24	4268.74	1	-12.0596
P03928	MT-ATP8	ATP synthase protein 8	7991.64	1	21843.9	14.4149
P04003	C4BPA	C4b-binding protein alpha chain	67033.2	26533.6	15551.3	-0.770783
P04040	CAT	Catalase	59756.2	51165.4	44094.1	-0.214585
P04049	RAF1	RAF proto-oncogene serine/threonine-protein kinase	73051.6	32748	390696	3.57657
P04062	GBA	Glucosylceramidase	59716.3	22438.5	133316	2.57079
P04075	ALDOA	Fructose-bisphosphate aldolase A	39420	194673	102109	-0.930947
P04080	CSTB	Cystatin-B	11139.6	196707	139379	-0.497036
P04083	ANXA1	Annexin A1	38714.2	673236	178591	-1.91445
P04114	APOB	Apolipoprotein B-100	515605	26821.4	101662	1.92232
P04150	NR3C1	Glucocorticoid receptor	85659.3	25917.8	138626	2.41918
P04156	PRNP	Major prion protein	27661.2	25899.3	23904	-0.11566
P04181	OAT	Ornithine aminotransferase, mitochondrial	48534.8	205295	258536	0.332664
P04183	TK1	Thymidine kinase, cytosolic	25468.7	6072.58	86576.9	3.8336
P04196	HRG	Histidine-rich glycoprotein	59578.3	74373	1.38795e+06	4.22203
P04222	HLA-C	HLA class I histocompatibility antigen, Cw-3 alpha chain	40860.8	16437.5	1	-14.0047
P04233	CD74	HLA class II histocompatibility antigen gamma chain	33515.6	9782.91	74435.3	2.92765
P04259	KRT6B	Keratin, type II cytoskeletal 6B	60066.9	2.85065e+06	1.55008e+06	-0.878947
P04264	KRT1	Keratin, type II cytoskeletal 1	66038.7	6.25735e+06	5.88151e+06	-0.0893643
P04406	GAPDH	Glyceraldehyde-3-phosphate dehydrogenase	36053.2	534600	253775	-1.07491
P04424	ASL	Argininosuccinate lyase	51658	33400	143035	2.09845
P04440	HLA-DPB1	HLA class II histocompatibility antigen, DP beta 1 chain	29159.3	4620.07	22301.3	2.27114
P04626	ERBB2	Receptor tyrosine-protein kinase erbB-2	137910	60863.1	515983	3.08368
P04632	CAPNS1	Calpain small subunit 1	28315.7	141623	357283	1.33501
P04637	TP53	Cellular tumor antigen p53	43653.2	15091	98806.9	2.71092
P04792	HSPB1	Heat shock protein beta-1	22782.5	99554	980486	3.29995
P04818	TYMS	Thymidylate synthase	35716	124397	67726	-0.877171
P04843	RPN1	Dolichyl-diphosphooligosaccharide--protein glycosyltransferase subunit 1	68569.4	184652	822660	2.15549
P04844	RPN2	Dolichyl-diphosphooligosaccharide--protein glycosyltransferase subunit 2	69284	168013	595083	1.82452
P04899	GNAI2	Guanine nucleotide-binding protein G(i) subunit alpha-2	40450.9	100985	175156	0.794503
P04908;P0C0S8;P20671;Q16777;Q6FI13;Q7L7L0;Q93077;Q96KK5;Q99878;Q9BTM1	HIST1H2AB;HIST1H2AG;HIST1H2AD;HIST2H2AC;HIST2H2AA3;HIST3H2A;HIST1H2AC;HIST1H2AH;HIST1H2AJ;H2AFJ	Histone H2A type 1-B/E;Histone H2A type 1;Histone H2A type 1-D;Histone H2A type 2-C;Histone H2A type 2-A;Histone H2A type 3;Histone H2A type 1-C;Histone H2A type 1-H;Histone H2A type 1-J;Histone H2A.J	14135.49;14091.48;14107.48;13988.37;14095.48;14121.46;14105.46;13906.25;13936.28;14019.41	410773	1.24546e+07	4.9222
P04920	SLC4A2	Anion exchange protein 2	137009	1829.62	12511.3	2.77361
P05023	ATP1A1	Sodium/potassium-transporting ATPase subunit alpha-1	112896	712974	2.07934e+06	1.5442
P05026	ATP1B1	Sodium/potassium-transporting ATPase subunit beta-1	35061.3	323548	1.00474e+06	1.63476
P05067	APP	Amyloid-beta A4 protein	86943.2	456174	141775	-1.68599
P05089	ARG1	Arginase-1	34734.9	62433.7	41027.4	-0.605739
P05091	ALDH2	Aldehyde dehydrogenase, mitochondrial	56381.3	9459.36	82209.8	3.1195
P05109	S100A8	Protein S100-A8	10834.5	40219.5	63606.3	0.661276
P05121	SERPINE1	Plasminogen activator inhibitor 1	45060	96441	306923	1.67016
P05141	SLC25A5	ADP/ATP translocase 2	32852.2	295996	5.6599e+06	4.25713
P05155	SERPING1	Plasma protease C1 inhibitor	55154.2	4875.89	4271.47	-0.190932
P05161	ISG15	Ubiquitin-like protein ISG15	17887.5	63230.2	159916	1.33863
P05198	EIF2S1	Eukaryotic translation initiation factor 2 subunit 1	36112.2	508802	1.12919e+06	1.15011
P05204;Q15651	HMGN2;HMGN3	Non-histone chromosomal protein HMG-17;High mobility group nucleosome-binding domain-containing protein 3	9392.67;10665.85	1	20042.7	14.2908
P05362	ICAM1	Intercellular adhesion molecule 1	57825.2	134498	465926	1.79251
P05386	RPLP1	60S acidic ribosomal protein P1	11513.9	34905.8	273821	2.9717
P05387	RPLP2	60S acidic ribosomal protein P2	11664.9	24808.6	81191.7	1.71049
P05388	RPLP0	60S acidic ribosomal protein P0	34273.5	522479	2.76539e+06	2.40404
P05455	SSB	Lupus La protein	46837.1	30545.2	216997	2.82866
P05556	ITGB1	Integrin beta-1	88415.3	125539	325579	1.37487
P05783	KRT18	Keratin, type I cytoskeletal 18	48057.8	418772	761198	0.862109
P05787	KRT8	Keratin, type II cytoskeletal 8	53704.2	909592	2.26983e+06	1.31929
P05976	MYL1	Myosin light chain 1/3, skeletal muscle isoform	21145.1	1	56725.5	15.7917
P06213	INSR	Insulin receptor	156333	3416.42	9111.37	1.41518
P06396	GSN	Gelsolin	85697.5	116208	340839	1.55237
P06400	RB1	Retinoblastoma-associated protein	106159	8342.09	40724.2	2.2874
P06493	CDK1	Cyclin-dependent kinase 1	34095.4	253099	2.3719e+06	3.22827
P06576	ATP5B	ATP synthase subunit beta, mitochondrial	56559.9	583447	1.55856e+06	1.41754
P06681	C2	Complement C2	83267.8	6126.8	86905.6	3.82624
P06702	S100A9	Protein S100-A9	13242	32262.8	96677.2	1.58331
P06703	S100A6	Protein S100-A6	10179.7	2.08228e+06	3.44309e+06	0.72554
P06730	EIF4E	Eukaryotic translation initiation factor 4E	25097.2	110583	326665	1.56269
P06732	CKM	Creatine kinase M-type	43101.1	1	18049.9	14.1397
P06733	ENO1	Alpha-enolase	47169	400125	426691	0.0927385
P06737	PYGL	Glycogen phosphorylase, liver form	97148.6	459563	722292	0.652321
P06744	GPI	Glucose-6-phosphate isomerase	63147.1	43392.2	69705.3	0.683835
P06748	NPM1	Nucleophosmin	32575	268438	1.91176e+06	2.83224
P06753	TPM3	Tropomyosin alpha-3 chain	32950	345164	393440	0.188864
P06756	ITGAV	Integrin alpha-V	116038	7723.62	132973	4.10571
P06865	HEXA	Beta-hexosaminidase subunit alpha	60702.8	16560.4	39635.2	1.25905
P06899;P23527;P33778;Q16778	HIST1H2BJ;HIST1H2BO;HIST1H2BB;HIST2H2BE	Histone H2B type 1-J;Histone H2B type 1-O;Histone H2B type 1-B;Histone H2B type 2-E	13904.16;13906.13;13950.19;13920.16	1	169654	17.3722
P07099	EPHX1	Epoxide hydrolase 1	52948.9	9034.59	303973	5.07234
P07195	LDHB	L-lactate dehydrogenase B chain	36638.5	479584	779477	0.700723
P07199	CENPB	Major centromere autoantigen B	65171.3	17929.3	255440	3.83259
P07203	GPX1	Glutathione peroxidase 1	22088.2	210833	82412.4	-1.35517
P07225	PROS1	Vitamin K-dependent protein S	75122.6	14179.1	58087.4	2.03446
P07237	P4HB	Protein disulfide-isomerase	57116.4	284460	305318	0.102085
P07305	H1F0	Histone H1.0	20862.9	1	808185	19.6243
P07339	CTSD	Cathepsin D	44552.2	489973	175478	-1.48141
P07355	ANXA2	Annexin A2	38604	1.72981e+06	692456	-1.32082
P07384	CAPN1	Calpain-1 catalytic subunit	81890.1	150150	237880	0.663834
P07437	TUBB	Tubulin beta chain	49670.8	3.18161e+06	1.55137e+07	2.28571
P07477	PRSS1	Trypsin-1	26558.1	2.38948e+07	2.73936e+07	0.197142
P07602	PSAP	Prosaposin	58112.6	11339.7	46887.4	2.04781
P07686	HEXB	Beta-hexosaminidase subunit beta	63111.3	11158.7	23223.2	1.0574
P07737	PFN1	Profilin-1	15054.2	745039	881433	0.242536
P07741	APRT	Adenine phosphoribosyltransferase	19607.8	21274.1	27252.9	0.357314
P07814	EPRS	Bifunctional glutamate/proline--tRNA ligase	170591	413205	686333	0.732052
P07858	CTSB	Cathepsin B	37821.6	67178.3	329697	2.29507
P07900	HSP90AA1	Heat shock protein HSP 90-alpha	84659.7	697571	763261	0.129837
P07910	HNRNPC	Heterogeneous nuclear ribonucleoproteins C1/C2	33670	49799.8	537579	3.43226
P07919	UQCRH	Cytochrome b-c1 complex subunit 6, mitochondrial	10738.8	1	24686.9	14.5915
P07942	LAMB1	Laminin subunit beta-1	198038	4613.48	17326.2	1.90903
P07947	YES1	Tyrosine-protein kinase Yes	60801.2	11223.4	30524	1.44343
P07948	LYN	Tyrosine-protein kinase Lyn	58574.1	10744.8	23903	1.15355
P07951	TPM2	Tropomyosin beta chain	32850.7	21245.3	9858.78	-1.10766
P07954	FH	Fumarate hydratase, mitochondrial	54637	57027.2	178970	1.65
P07992	ERCC1	DNA excision repair protein ERCC-1	32562.4	8053.29	21231.1	1.39853
P07996	THBS1	Thrombospondin-1	129383	260373	762062	1.54933
P08133	ANXA6	Annexin A6	75873.3	320915	267972	-0.260108
P08134;P61586	RHOC;RHOA	Rho-related GTP-binding protein RhoC;Transforming protein RhoA	22006.36;21768.12	22839.1	26808.7	0.231195
P08174	CD55	Complement decay-accelerating factor	41400.1	5233.02	14545.3	1.47484
P08185	SERPINA6	Corticosteroid-binding globulin	45140.9	33730.8	20715.9	-0.703328
P08195	SLC3A2	4F2 cell-surface antigen heavy chain	67994	262883	772721	1.55553
P08236	GUSB	Beta-glucuronidase	74731.9	18659.7	58775.6	1.65529
P08237	PFKM	ATP-dependent 6-phosphofructokinase, muscle type	85182.5	33320.8	296966	3.1558
P08238	HSP90AB1	Heat shock protein HSP 90-beta	83264.2	3.33892e+06	7.4142e+06	1.15091
P08240	SRPRA	Signal recognition particle receptor subunit alpha	69811.2	1606.93	62670.3	5.2854
P08243	ASNS	Asparagine synthetase [glutamine-hydrolyzing]	64369.9	25525	214005	3.06766
P08397	HMBS	Porphobilinogen deaminase	39330.1	16940.3	15840.8	-0.0968198
P08559	PDHA1	Pyruvate dehydrogenase E1 component subunit alpha, somatic form, mitochondrial	43295.6	289028	273218	-0.0811603
P08572	COL4A2	Collagen alpha-2(IV) chain	167553	4841.46	313767	6.01811
P08574	CYC1	Cytochrome c1, heme protein, mitochondrial	35422	15447.8	371728	4.58877
P08579	SNRPB2	U2 small nuclear ribonucleoprotein B''	25486.3	43628.7	54141.1	0.311447
P08581	MET	Hepatocyte growth factor receptor	155541	25865.6	80123.3	1.63119
P08582	MELTF	Melanotransferrin	80214.6	17803.2	50174.9	1.49483
P08603	CFH	Complement factor H	139096	22507.8	77709.3	1.78766
P08621	SNRNP70	U1 small nuclear ribonucleoprotein 70 kDa	51556.7	13076.6	1.04772e+06	6.32412
P08648	ITGA5	Integrin alpha-5	114536	10083.5	34376	1.76941
P08651	NFIC	Nuclear factor 1 C-type	55675	38356.6	1.1759e+06	4.93815
P08670	VIM	Vimentin	53651.7	547436	1.07995e+06	0.980207
P08697	SERPINF2	Alpha-2-antiplasmin	54565.8	26895.1	7632.41	-1.81713
P08708	RPS17	40S ribosomal protein S17	15550.1	116873	1.12854e+06	3.27145
P08727	KRT19	Keratin, type I cytoskeletal 19	44106	733467	1.16619e+06	0.668998
P08729	KRT7	Keratin, type II cytoskeletal 7	51385.7	736378	1.65829e+06	1.17118
P08754	GNAI3	Guanine nucleotide-binding protein G(k) subunit alpha	40532.2	96499.7	54884.8	-0.814119
P08758	ANXA5	Annexin A5	35936.8	201019	1.40144e+06	2.8015
P08779	KRT16	Keratin, type I cytoskeletal 16	51267.8	893451	555576	-0.685405
P08865	RPSA	40S ribosomal protein SA	32854.1	74667.9	2.3503e+06	4.97621
P09001	MRPL3	39S ribosomal protein L3, mitochondrial	38632.6	14984	104029	2.7955
P09012	SNRPA	U1 small nuclear ribonucleoprotein A	31279.5	11523.9	1.02037e+06	6.46832
P09110	ACAA1	3-ketoacyl-CoA thiolase, peroxisomal	44292	52941	15566.7	-1.76592
P09132	SRP19	Signal recognition particle 19 kDa protein	16155.7	13720.9	47583.7	1.79409
P09211	GSTP1	Glutathione S-transferase P	23355.8	4.91761e+07	1.18531e+08	1.26923
P09234	SNRPC	U1 small nuclear ribonucleoprotein C	17393.7	1	62083.8	15.9219
P09382	LGALS1	Galectin-1	14715.7	143494	68888.9	-1.05865
P09429	HMGB1	High mobility group protein B1	24893.8	115881	17714.6	-2.70964
P09467	FBP1	Fructose-1,6-bisphosphatase 1	36842.5	6404.18	1	-12.6448
P09471	GNAO1	Guanine nucleotide-binding protein G(o) subunit alpha	40050.6	487620	6828.01	-6.15815
P09488	GSTM1	Glutathione S-transferase Mu 1	25711.8	8.2968e+06	2.0609e+07	1.31265
P09493	TPM1	Tropomyosin alpha-1 chain	32708.6	89365.3	31864.3	-1.48777
P09496	CLTA	Clathrin light chain A	27076.7	75501.7	41028.3	-0.879888
P09497	CLTB	Clathrin light chain B	25190.5	268148	153161	-0.807986
P09525	ANXA4	Annexin A4	35882.7	124557	25828.8	-2.26976
P09543	CNP	2',3'-cyclic-nucleotide 3'-phosphodiesterase	47578.6	33614.9	111405	1.72864
P09622	DLD	Dihydrolipoyl dehydrogenase, mitochondrial	54177.2	23549.1	237359	3.33332
P09651	HNRNPA1	Heterogeneous nuclear ribonucleoprotein A1	38746.7	379529	1.54147e+06	2.02202
P09661	SNRPA1	U2 small nuclear ribonucleoprotein A'	28415.6	240093	416626	0.795157
P09669	COX6C	Cytochrome c oxidase subunit 6C	8781.43	8595.09	66967.6	2.96188
P09758	TACSTD2	Tumor-associated calcium signal transducer 2	35709.4	45664.6	259341	2.5057
P09874	PARP1	Poly [ADP-ribose] polymerase 1	113084	13928.3	4.43513e+06	8.31482
P09884	POLA1	DNA polymerase alpha catalytic subunit	165913	4.2713e+07	2.6496e+07	-0.688899
P09913	IFIT2	Interferon-induced protein with tetratricopeptide repeats 2	54632.2	24165	108924	2.17232
P09914	IFIT1	Interferon-induced protein with tetratricopeptide repeats 1	55360.3	7758.25	55747.3	2.8451
P09960	LTA4H	Leukotriene A-4 hydrolase	69285.3	21362	42081.1	0.978125
P09972	ALDOC	Fructose-bisphosphate aldolase C	39455.9	53545.5	1	-15.7085
P0C0L4;P0C0L5	C4A;C4B	Complement C4-A;Complement C4-B	192785.48;192751.45	79426.3	287178	1.85426
P0C0S5;Q71UI9	H2AFZ;H2AFV	Histone H2A.Z;Histone H2A.V	13552.73;13508.68	1	886691	19.7581
P0C2W1	FBXO45	F-box/SPRY domain-containing protein 1	30632.7	6377.79	24704.1	1.95362
P0C7H8;Q9BYR9;Q9BYU5	KRTAP2-3;KRTAP2-4;KRTAP2-1	Keratin-associated protein 2-3;Keratin-associated protein 2-4;Keratin-associated protein 2-1	13479.91;13479.91;13513.93	4908.98	3282893	9.38533
P0C7T5	ATXN1L	Ataxin-1-like	73306.2	2928.3	143590	5.61574
P0CAP2	POLR2M	DNA-directed RNA polymerase II subunit GRINL1A	41739.6	29799.9	1.01758e+06	5.09369
P0CG12	CHTF8	Chromosome transmission fidelity protein 8 homolog isoform 2	51391.3	30779.6	40886.3	0.409641
P0CG39	POTEJ	POTE ankyrin domain family member J	117390	296022	743709	1.32903
P0DI81;P0DI82	TRAPPC2;TRAPPC2B	Trafficking protein particle complex subunit 2;Trafficking protein particle complex subunit 2B	16444.74;16444.74	1	93710.3	16.5159
P0DI83	RAB34	Ras-related protein Rab-34, isoform NARR	21118.3	1	34783.5	15.0861
P0DMV8;P0DMV9	HSPA1A;HSPA1B	Heat shock 70 kDa protein 1A;Heat shock 70 kDa protein 1B	70052.23;70052.23	1.69792e+06	2.3722e+06	0.482462
P0DN76;Q01081	U2AF1L5;U2AF1	Splicing factor U2AF 35 kDa subunit-like protein;Splicing factor U2AF 35 kDa subunit	27872.05;27872.05	12031.9	3.22802e+06	8.06765
P0DP23;P0DP24;P0DP25	CALM1;CALM2;CALM3	Calmodulin-1;Calmodulin-2;Calmodulin-3	16837.58;16837.58;16837.58	8583.92	44919.9	2.38765
P0DPB5	POLR1D	Protein POLR1D, isoform 2	14332.1	1	31599.9	14.9476
P0DPB6	POLR1D	DNA-directed RNA polymerases I and III subunit RPAC2	15237.2	7918.37	62480.4	2.98013
P10155	TROVE2	60 kDa SS-A/Ro ribonucleoprotein	60670.6	48960.9	135360	1.4671
P10276	RARA	Retinoic acid receptor alpha	50771.3	1	21607.9	14.3993
P10301	RRAS	Ras-related protein R-Ras	23480.5	9127.93	25814.1	1.4998
P10398	ARAF	Serine/threonine-protein kinase A-Raf	67585.4	55670.8	266561	2.25947
P10412	HIST1H1E	Histone H1.4	21865.3	14018.3	2.41013e+06	7.42566
P10515	DLAT	Dihydrolipoyllysine-residue acetyltransferase component of pyruvate dehydrogenase complex, mitochondrial	68996.7	43594.6	124846	1.51793
P10586	PTPRF	Receptor-type tyrosine-protein phosphatase F	212879	31750.9	111246	1.80889
P10599	TXN	Thioredoxin	11737.5	1.20888e+06	1.36582e+06	0.1761
P10619	CTSA	Lysosomal protective protein	54466.1	46944.7	128651	1.45443
P10620	MGST1	Microsomal glutathione S-transferase 1	17598.7	73239.1	207409	1.50179
P10644	PRKAR1A	cAMP-dependent protein kinase type I-alpha regulatory subunit	42981.7	23305.9	56415.2	1.27539
P10746	UROS	Uroporphyrinogen-III synthase	28627.7	17410.7	17796.9	0.0316514
P10768	ESD	S-formylglutathione hydrolase	31462.8	6068.53	1	-12.5671
P10809	HSPD1	60 kDa heat shock protein, mitochondrial	61054.6	2.03643e+06	2.79595e+06	0.457293
P11021	HSPA5	78 kDa glucose-regulated protein	72333	1.57273e+06	6.55645e+06	2.05964
P11047	LAMC1	Laminin subunit gamma-1	177603	6451.18	69217	3.42349
P11137	MAP2	Microtubule-associated protein 2	199526	16885.7	112199	2.73219
P11142	HSPA8	Heat shock cognate 71 kDa protein	70898.1	1.21475e+06	2.44333e+06	1.00819
P11166	SLC2A1	Solute carrier family 2, facilitated glucose transporter member 1	54083.8	309772	299760	-0.0474015
P11171	EPB41	Protein 4.1	97016.9	6219.4	12028.5	0.951609
P11172	UMPS	Uridine 5'-monophosphate synthase	52221.6	30039.5	440049	3.87273
P11177	PDHB	Pyruvate dehydrogenase E1 component subunit beta, mitochondrial	39233.4	48283.3	430008	3.15477
P11182	DBT	Lipoamide acyltransferase component of branched-chain alpha-keto acid dehydrogenase complex, mitochondrial	53487.1	26539.9	26882.3	0.0184902
P11216	PYGB	Glycogen phosphorylase, brain form	96695.9	119047	371219	1.64074
P11233	RALA	Ras-related protein Ral-A	23566.8	301828	191832	-0.653885
P11274	BCR	Breakpoint cluster region protein	142819	31498.7	1.72304e+06	5.77352
P11279	LAMP1	Lysosome-associated membrane glycoprotein 1	44882.3	43902.5	50580.9	0.20429
P11310	ACADM	Medium-chain specific acyl-CoA dehydrogenase, mitochondrial	46588.3	36287	30319.1	-0.259223
P11387	TOP1	DNA topoisomerase 1	90725.7	4343.7	153774	5.14574
P11388	TOP2A	DNA topoisomerase 2-alpha	174385	3678.15	60457.1	4.03886
P11413	G6PD	Glucose-6-phosphate 1-dehydrogenase	59256.8	1.13824e+06	1.65971e+06	0.544129
P11441	UBL4A	Ubiquitin-like protein 4A	17776.5	28709	21853.9	-0.393614
P11498	PC	Pyruvate carboxylase, mitochondrial	129634	577394	1.85465e+06	1.68352
P11586	MTHFD1	C-1-tetrahydrofolate synthase, cytoplasmic	101559	577192	2.11618e+06	1.87434
P11717	IGF2R	Cation-independent mannose-6-phosphate receptor	274375	11883.7	35757.6	1.58927
P11766	ADH5	Alcohol dehydrogenase class-3	39724.2	260133	39963.7	-2.70249
P11802	CDK4	Cyclin-dependent kinase 4	33729.8	7198.04	25144.6	1.80457
P11908	PRPS2	Ribose-phosphate pyrophosphokinase 2	34769.1	450982	1.02052e+06	1.17816
P11940	PABPC1	Polyadenylate-binding protein 1	70670.8	214731	2.4291e+06	3.49982
P12004	PCNA	Proliferating cell nuclear antigen	28768.8	904495	2.34161e+06	1.37232
P12035	KRT3	Keratin, type II cytoskeletal 3	64417	18363.1	18431.7	0.00537561
P12081	HARS	Histidine--tRNA ligase, cytoplasmic	57410.5	22855.3	73598.3	1.68714
P12109	COL6A1	Collagen alpha-1(VI) chain	108529	14396.8	44124.7	1.61584
P12110	COL6A2	Collagen alpha-2(VI) chain	108579	8895.1	12959.9	0.542969
P12235	SLC25A4	ADP/ATP translocase 1	33064.5	5018.88	194000	5.27255
P12236	SLC25A6	ADP/ATP translocase 3	32866.3	319579	6.3789e+06	4.31906
P12268	IMPDH2	Inosine-5'-monophosphate dehydrogenase 2	55805	305844	1.62648e+06	2.41088
P12270	TPR	Nucleoprotein TPR	267293	14070	62577.4	2.15302
P12273	PIP	Prolactin-inducible protein	16572.5	54007.9	51018.8	-0.0821408
P12277	CKB	Creatine kinase B-type	42644.3	13912	1	-13.764
P12429	ANXA3	Annexin A3	36375.3	37920	172435	2.18502
P12694	BCKDHA	2-oxoisovalerate dehydrogenase subunit alpha, mitochondrial	50471	11383.9	13105.6	0.203196
P12814	ACTN1	Alpha-actinin-1	103058	489852	765411	0.643889
P12931	SRC	Proto-oncogene tyrosine-protein kinase Src	59834.8	44773.5	222351	2.31212
P12955	PEPD	Xaa-Pro dipeptidase	54548.2	292770	183808	-0.671572
P12956	XRCC6	X-ray repair cross-complementing protein 6	69843.1	584474	1.74115e+06	1.57483
P13010	XRCC5	X-ray repair cross-complementing protein 5	82704.5	270893	652525	1.26831
P13051	UNG	Uracil-DNA glycosylase	34645.5	74948.3	19890.8	-1.91379
P13073	COX4I1	Cytochrome c oxidase subunit 4 isoform 1, mitochondrial	19576.7	1	40106.5	15.2915
P13196	ALAS1	5-aminolevulinate synthase, nonspecific, mitochondrial	70580.9	1750.12	3531.39	1.01278
P13473	LAMP2	Lysosome-associated membrane glycoprotein 2	44960.7	1.25173e+07	118365	-6.72453
P13489	RNH1	Ribonuclease inhibitor	49973.5	565469	617900	0.127926
P13497	BMP1	Bone morphogenetic protein 1	111249	199.255	8370.52	5.39263
P13639	EEF2	Elongation factor 2	95338.1	1.89372e+06	4.46072e+06	1.23605
P13645	KRT10	Keratin, type I cytoskeletal 10	58827.1	7.49817e+06	5448693	-0.460629
P13646	KRT13	Keratin, type I cytoskeletal 13	49588.2	219902	333214	0.599585
P13647	KRT5	Keratin, type II cytoskeletal 5	62378.3	1.12727e+06	725080	-0.63662
P13667	PDIA4	Protein disulfide-isomerase A4	72932.5	166232	116444	-0.513564
P13674	P4HA1	Prolyl 4-hydroxylase subunit alpha-1	61049.3	132577	329944	1.31539
P13693	TPT1	Translationally-controlled tumor protein	19595.3	9948.14	5039.9	-0.981032
P13716	ALAD	Delta-aminolevulinic acid dehydratase	36294.9	9841.96	5515.97	-0.835331
P13726	F3	Tissue factor	33067.5	5439.73	14403.7	1.40484
P13747	HLA-E	HLA class I histocompatibility antigen, alpha chain E	40156.7	2416.87	1	-11.2389
P13760;Q30154	HLA-DRB1;HLA-DRB5	HLA class II histocompatibility antigen, DRB1-4 beta chain;HLA class II histocompatibility antigen, DR beta 5 chain	30112.18;30056.01	19362	12176.9	-0.66908
P13796	LCP1	Plastin-2	70288.4	9224.28	32797.8	1.83009
P13797	PLS3	Plastin-3	70811	7.72909e+06	5.27948e+06	-0.549902
P13798	APEH	Acylamino-acid-releasing enzyme	81224.6	18280.6	79250.9	2.11611
P13804	ETFA	Electron transfer flavoprotein subunit alpha, mitochondrial	35079.6	23672.9	38809.2	0.713159
P13807	GYS1	Glycogen [starch] synthase, muscle	83785.5	27834.9	699262	4.65086
P13861	PRKAR2A	cAMP-dependent protein kinase type II-alpha regulatory subunit	45518.4	39165.7	117652	1.58686
P13984	GTF2F2	General transcription factor IIF subunit 2	28380.2	62515	366230	2.55048
P13987	CD59	CD59 glycoprotein	14177.3	1	10533.3	13.3627
P13994	CCDC130	Coiled-coil domain-containing protein 130	44802.3	4996.9	17209.1	1.78406
P13995	MTHFD2	Bifunctional methylenetetrahydrofolate dehydrogenase/cyclohydrolase, mitochondrial	37895.1	3501.37	2816.2	-0.314171
P14174	MIF	Macrophage migration inhibitory factor	12476.3	37082.4	39837.9	0.103407
P14314	PRKCSH	Glucosidase 2 subunit beta	59425.4	54618.3	118107	1.11263
P14324	FDPS	Farnesyl pyrophosphate synthase	48275.5	30526.4	95613.1	1.64715
P14373	TRIM27	Zinc finger protein RFP	58489.7	11918.7	111260	3.22263
P14406	COX7A2	Cytochrome c oxidase subunit 7A2, mitochondrial	9395.98	1	32536.9	14.9898
P14618	PKM	Pyruvate kinase PKM	57936.9	3.49658e+06	5.18055e+06	0.567159
P14621	ACYP2	Acylphosphatase-2	11139.6	99969.6	94832	-0.0761152
P14625	HSP90B1	Endoplasmin	92468.9	623236	985837	0.66157
P14635	CCNB1	G2/mitotic-specific cyclin-B1	48337.4	3337.08	265877	6.31603
P14649	MYL6B	Myosin light chain 6B	22764	143998	2.87909e+06	4.32149
P14678	SNRPB	Small nuclear ribonucleoprotein-associated proteins B and B'	24610.1	70944.2	3.77403e+06	5.73328
P14735	IDE	Insulin-degrading enzyme	117968	11400.7	168683	3.88712
P14866	HNRNPL	Heterogeneous nuclear ribonucleoprotein L	64132.8	28008.6	274301	3.29182
P14868	DARS	Aspartate--tRNA ligase, cytoplasmic	57136.2	1.17533e+06	2.07245e+06	0.818269
P14921	ETS1	Protein C-ets-1	50407.9	6333.25	544349	6.42544
P14923	JUP	Junction plakoglobin	81744.7	63807.5	158628	1.31385
P15056	BRAF	Serine/threonine-protein kinase B-raf	84436.9	2069.8	54886.7	4.72889
P15104	GLUL	Glutamine synthetase	42064.4	9582.01	57499.4	2.58515
P15121	AKR1B1	Aldose reductase	35853.4	42935	56438	0.394513
P15153	RAC2	Ras-related C3 botulinum toxin substrate 2	21428.8	65563.4	60293.9	-0.120878
P15170	GSPT1	Eukaryotic peptide chain release factor GTP-binding subunit ERF3A	55755.9	85940.9	138414	0.687572
P15311	EZR	Ezrin	69412.8	1.78692e+06	534621	-1.74089
P15336	ATF2	Cyclic AMP-dependent transcription factor ATF-2	54537.4	1	31608.7	14.948
P15374	UCHL3	Ubiquitin carboxyl-terminal hydrolase isozyme L3	26182.6	20128.2	19015.4	-0.0820487
P15407	FOSL1	Fos-related antigen 1	29413.2	16047.4	237397	3.88689
P15408	FOSL2	Fos-related antigen 2	35193.4	2624.72	43916.1	4.06451
P15531	NME1	Nucleoside diphosphate kinase A	17148.7	9817.1	17303.5	0.817696
P15559	NQO1	NAD(P)H dehydrogenase [quinone] 1	30867.6	19332.6	48183.5	1.3175
P15586	GNS	N-acetylglucosamine-6-sulfatase	62082.1	13155.7	47844.7	1.86267
P15735	PHKG2	Phosphorylase b kinase gamma catalytic chain, liver/testis isoform	46442.2	28876.4	11730.2	-1.29966
P15880	RPS2	40S ribosomal protein S2	31324.4	31498	1.50544e+06	5.57879
P15924	DSP	Desmoplakin	331774	112417	165400	0.5571
P15927	RPA2	Replication protein A 32 kDa subunit	29246.8	31030	75461.7	1.28208
P16035	TIMP2	Metalloproteinase inhibitor 2	24399.2	1	123845	16.9182
P16070	CD44	CD44 antigen	81537.6	46570.2	100806	1.1141
P16144	ITGB4	Integrin beta-4	202167	107594	289961	1.43027
P16152	CBR1	Carbonyl reductase [NADPH] 1	30374.9	1.73004e+07	3.46581e+07	1.00239
P16157	ANK1	Ankyrin-1	206265	1	0.253887	-1.97774
P16219	ACADS	Short-chain specific acyl-CoA dehydrogenase, mitochondrial	44297.2	34836.4	14820.7	-1.23298
P16278	GLB1	Beta-galactosidase	76074.9	10455.2	42018.7	2.00681
P16298	PPP3CB	Serine/threonine-protein phosphatase 2B catalytic subunit beta isoform	59024.3	4744.16	16445.4	1.79346
P16333	NCK1	Cytoplasmic protein NCK1	42864.5	14227.9	48628.7	1.77309
P16383	GCFC2	GC-rich sequence DNA-binding factor 2	89384.6	6379.93	72817.2	3.51267
P16403	HIST1H1C	Histone H1.2	21364.8	12242.3	705265	5.84822
P16435	POR	NADPH--cytochrome P450 reductase	76689.7	20739.6	24360.6	0.232162
P16591	FER	Tyrosine-protein kinase Fer	94637.9	8302.4	22005.7	1.40627
P16615	ATP2A2	Sarcoplasmic/endoplasmic reticulum calcium ATPase 2	114757	101983	341445	1.74333
P16885	PLCG2	1-phosphatidylinositol 4,5-bisphosphate phosphodiesterase gamma-2	147870	7034.91	10981.6	0.642491
P16930	FAH	Fumarylacetoacetase	46374.3	15887.9	1	-13.9556
P16949	STMN1	Stathmin	17302.5	45567.5	44028.6	-0.0495647
P16989	YBX3	Y-box-binding protein 3	40089.9	4660.53	242211	5.69963
P17096	HMGA1	High mobility group protein HMG-I/HMG-Y	11676	2433.12	75808	4.96147
P17152	TMEM11	Transmembrane protein 11, mitochondrial	21540.8	1	143860	17.1343
P17174	GOT1	Aspartate aminotransferase, cytoplasmic	46247.5	130780	70807.5	-0.885168
P17252	PRKCA	Protein kinase C alpha type	76749.9	34924.1	76351.1	1.12843
P17275	JUNB	Transcription factor jun-B	35879.3	4187.21	98972.4	4.56296
P17301	ITGA2	Integrin alpha-2	129295	13070.5	36691.5	1.48913
P17480	UBTF	Nucleolar transcription factor 1	89405.9	13392.3	98339.9	2.87637
P17535	JUND	Transcription factor jun-D	35173.9	1	9385.77	13.1963
P17544	ATF7	Cyclic AMP-dependent transcription factor ATF-7	52967.3	1	100417	16.6156
P17612	PRKACA	cAMP-dependent protein kinase catalytic subunit alpha	40589.7	25351.8	22007.6	-0.204089
P17655	CAPN2	Calpain-2 catalytic subunit	79995.4	485111	771263	0.668909
P17661	DES	Desmin	53535.8	1	11740.2	13.5192
P17706	PTPN2	Tyrosine-protein phosphatase non-receptor type 2	48473.3	30296.5	55888.2	0.883395
P17812	CTPS1	CTP synthase 1	66690.4	296801	1.7503e+06	2.56003
P17844	DDX5	Probable ATP-dependent RNA helicase DDX5	69148.1	327997	3.8704e+06	3.56073
P17858	PFKL	ATP-dependent 6-phosphofructokinase, liver type	85018.4	637723	1.69411e+06	1.40953
P17931	LGALS3	Galectin-3	26152.3	39577.6	181387	2.19631
P17980	PSMC3	26S proteasome regulatory subunit 6A	49203.5	410981	629274	0.614614
P17987	TCP1	T-complex protein 1 subunit alpha	60343.6	566982	2.06859e+06	1.86728
P18031	PTPN1	Tyrosine-protein phosphatase non-receptor type 1	49966.8	383542	550443	0.52121
P18074	ERCC2	General transcription and DNA repair factor IIH helicase subunit XPD	86909.2	74738	218211	1.54581
P18077	RPL35A	60S ribosomal protein L35a	12537.7	105466	3.45854e+06	5.03531
P18084	ITGB5	Integrin beta-5	88054.2	16620.1	90485.3	2.44475
P18085	ARF4	ADP-ribosylation factor 4	20510.8	553855	2.38875e+06	2.10868
P18124	RPL7	60S ribosomal protein L7	29225.8	74708	1.76756e+06	4.56435
P18206	VCL	Vinculin	123799	515513	434590	-0.246351
P18440	NAT1	Arylamine N-acetyltransferase 1	33898.7	25488.9	98370.3	1.94835
P18462;P30450	HLA-A	HLA class I histocompatibility antigen, A-25 alpha chain;HLA class I histocompatibility antigen, A-26 alpha chain	41218.02;41061.8	37361.6	15075	-1.3094
P18583	SON	Protein SON	263830	4436.55	91183.8	4.36127
P18615	NELFE	Negative elongation factor E	43239.8	12068.4	143661	3.57337
P18621	RPL17	60S ribosomal protein L17	21397	50502	2.12148e+06	5.39259
P18669	PGAM1	Phosphoglycerate mutase 1	28803.9	14725.4	29369.9	0.996028
P18754	RCC1	Regulator of chromosome condensation	44969	5837.31	9072.84	0.636251
P18850	ATF6	Cyclic AMP-dependent transcription factor ATF-6 alpha	74584.6	1	22724.7	14.472
P18858	LIG1	DNA ligase 1	101736	16867	436286	4.693
P18859	ATP5J	ATP synthase-coupling factor 6, mitochondrial	12587.5	1	14605.8	13.8343
P18887	XRCC1	DNA repair protein XRCC1	69476.5	19185.8	62892.1	1.71284
P19013	KRT4	Keratin, type II cytoskeletal 4	57285.2	28310.2	1	-14.789
P19021	PAM	Peptidyl-glycine alpha-amidating monooxygenase	108332	15256.2	56673.4	1.89328
P19174	PLCG1	1-phosphatidylinositol 4,5-bisphosphate phosphodiesterase gamma-1	148532	55359.1	256486	2.21199
P19338	NCL	Nucleolin	76614.4	125997	1.26929e+06	3.33256
P19367	HK1	Hexokinase-1	102486	377002	1.54196e+06	2.03212
P19387	POLR2C	DNA-directed RNA polymerase II subunit RPB3	31441.2	38469.7	1.81663e+06	5.5614
P19388	POLR2E	DNA-directed RNA polymerases I, II, and III subunit RPABC1	24551.2	1.05722e+06	2.70251e+06	1.35403
P19404	NDUFV2	NADH dehydrogenase [ubiquinone] flavoprotein 2, mitochondrial	27391.5	2304.23	15364.1	2.73721
P19419	ELK1	ETS domain-containing protein Elk-1	44888	4483.07	27329.3	2.60789
P19447	ERCC3	General transcription and DNA repair factor IIH helicase subunit XPB	89277.7	2936.86	72718.8	4.62998
P19474	TRIM21	E3 ubiquitin-protein ligase TRIM21	54169.7	28879.9	212586	2.87991
P19525	EIF2AK2	Interferon-induced, double-stranded RNA-activated protein kinase	62094.3	65269.5	406644	2.63928
P19532	TFE3	Transcription factor E3	61521	4794.47	73157.4	3.93156
P19623	SRM	Spermidine synthase	33824.7	396090	102526	-1.94983
P19634	SLC9A1	Sodium/hydrogen exchanger 1	90763	1	10803.6	13.3992
P19652	ORM2	Alpha-1-acid glycoprotein 2	23602.6	79059.4	45893.4	-0.784651
P19784	CSNK2A2	Casein kinase II subunit alpha'	41213.2	30827	287798	3.22279
P19823	ITIH2	Inter-alpha-trypsin inhibitor heavy chain H2	106463	23169.9	2764.33	-3.06725
P19827	ITIH1	Inter-alpha-trypsin inhibitor heavy chain H1	101389	8764.6	1	-13.0975
P19838	NFKB1	Nuclear factor NF-kappa-B p105 subunit	105356	13806	95303	2.78723
P19971	TYMP	Thymidine phosphorylase	49955.5	44820	80197.9	0.839423
P20020	ATP2B1	Plasma membrane calcium-transporting ATPase 1	138755	37232.3	125787	1.75635
P20042	EIF2S2	Eukaryotic translation initiation factor 2 subunit 2	38388.4	86246.6	451091	2.38688
P20073	ANXA7	Annexin A7	52739.2	52312.9	197396	1.91585
P20226;Q6SJ96	TBP;TBPL2	TATA-box-binding protein;TATA box-binding protein-like protein 2	37698.15;41524.48	7591.87	8927.79	0.233848
P20248	CCNA2	Cyclin-A2	48550.8	6502.33	672779	6.69303
P20290	BTF3	Transcription factor BTF3	22168	23073.9	95277.4	2.04588
P20339	RAB5A	Ras-related protein Rab-5A	23658.7	86480.3	317933	1.87828
P20340	RAB6A	Ras-related protein Rab-6A	23592.8	4678.28	18114.6	1.9531
P20393	NR1D1	Nuclear receptor subfamily 1 group D member 1	66805.2	1	20947.5	14.3545
P20585	MSH3	DNA mismatch repair protein Msh3	127412	3724.32	46709.9	3.64868
P20618	PSMB1	Proteasome subunit beta type-1	26489.4	28144.8	165888	2.55927
P20645	M6PR	Cation-dependent mannose-6-phosphate receptor	30993.3	4182.96	1	-12.0303
P20700	LMNB1	Lamin-B1	66408.3	12617.2	72848.1	2.5295
P20749	BCL3	B-cell lymphoma 3 protein	47583.5	25927.4	578090	4.47874
P20810	CAST	Calpastatin	76572.8	195121	5.7851e+06	4.8899
P20839	IMPDH1	Inosine-5'-monophosphate dehydrogenase 1	55405.8	9430.54	184892	4.2932
P20930	FLG	Filaggrin	435170	44162.1	55886.2	0.339685
P20936	RASA1	Ras GTPase-activating protein 1	116403	228512	443007	0.955059
P21127	CDK11B	Cyclin-dependent kinase 11B	92707	20461.4	3.17842e+06	7.27926
P21266	GSTM3	Glutathione S-transferase Mu 3	26559.6	7.90688e+06	2.15668e+07	1.44763
P21281	ATP6V1B2	V-type proton ATPase subunit B, brain isoform	56500.7	147599	241347	0.709425
P21283	ATP6V1C1	V-type proton ATPase subunit C 1	43941.6	37723.3	106278	1.49431
P21333	FLNA	Filamin-A	280739	1.27749e+06	3.02918e+06	1.24562
P21399	ACO1	Cytoplasmic aconitate hydratase	98398.9	318723	1.12515e+06	1.81974
P21589	NT5E	5'-nucleotidase	63367.7	217753	232367	0.0937124
P21796	VDAC1	Voltage-dependent anion-selective channel protein 1	30772.6	33875.9	81468.1	1.26598
P21912	SDHB	Succinate dehydrogenase [ubiquinone] iron-sulfur subunit, mitochondrial	31629.7	2079.37	26220.9	3.6565
P21964	COMT	Catechol O-methyltransferase	30037	26131.8	94608.4	1.85616
P21980	TGM2	Protein-glutamine gamma-glutamyltransferase 2	77328.8	1.68286e+06	3.07776e+06	0.87096
P22033	MUT	Methylmalonyl-CoA mutase, mitochondrial	83134.4	13576.3	73395.5	2.4346
P22059	OSBP	Oxysterol-binding protein 1	89420.6	23831.4	20098.1	-0.245803
P22061	PCMT1	Protein-L-isoaspartate(D-aspartate) O-methyltransferase	24636.4	578247	112918	-2.3564
P22087	FBL	rRNA 2'-O-methyltransferase fibrillarin	33784.2	1519.33	187062	6.94393
P22102	GART	Trifunctional purine biosynthetic protein adenosine-3	107767	801580	1.87935e+06	1.22931
P22234	PAICS	Multifunctional protein ADE2	47079.2	432440	282240	-0.615577
P22314	UBA1	Ubiquitin-like modifier-activating enzyme 1	117849	287293	429261	0.579334
P22392	NME2	Nucleoside diphosphate kinase B	17298	542474	784367	0.531975
P22413	ENPP1	Ectonucleotide pyrophosphatase/phosphodiesterase family member 1	104924	12152.6	100989	3.05487
P22528;P35321	SPRR1B;SPRR1A	Cornifin-B;Cornifin-A	9887.56;9877.47	31640.3	20496.6	-0.626381
P22531;P22532;P35325;P35326;Q9BYE4	SPRR2E;SPRR2D;SPRR2B;SPRR2A;SPRR2G	Small proline-rich protein 2E;Small proline-rich protein 2D;Small proline-rich protein 2B;Small proline-rich protein 2A;Small proline-rich protein 2G	7855.35;7905.35;7975.43;7965.39;8157.61	48848.8	1	-15.576
P22626	HNRNPA2B1	Heterogeneous nuclear ribonucleoproteins A2/B1	37429.7	98428.1	1.22965e+06	3.64303
P22670	RFX1	MHC class II regulatory factor RFX1	104758	2043.23	11031.6	2.43272
P22676	CALB2	Calretinin	31539.9	41866.4	21903.8	-0.934616
P22681	CBL	E3 ubiquitin-protein ligase CBL	99632.8	10919.7	99576.2	3.18887
P22692	IGFBP4	Insulin-like growth factor-binding protein 4	27934	9918.59	22244.9	1.16527
P22694	PRKACB	cAMP-dependent protein kinase catalytic subunit beta	40622.7	8299.46	18236.5	1.13574
P22695	UQCRC2	Cytochrome b-c1 complex subunit 2, mitochondrial	48443	301536	581483	0.947406
P22735	TGM1	Protein-glutamine gamma-glutamyltransferase K	89786.7	16212.5	10960	-0.564867
P22830	FECH	Ferrochelatase, mitochondrial	47862.2	20516.2	107662	2.39167
P23193	TCEA1	Transcription elongation factor A protein 1	33969.6	12910.3	63219.5	2.29185
P23219;P35354	PTGS1;PTGS2	Prostaglandin G/H synthase 1;Prostaglandin G/H synthase 2	68686.35;68996.12	4968.57	9473.79	0.93111
P23229	ITGA6	Integrin alpha-6	126606	170198	289981	0.768743
P23246	SFPQ	Splicing factor, proline- and glutamine-rich	76149.3	83489.9	1.10052e+06	3.72044
P23258	TUBG1	Tubulin gamma-1 chain	51169.9	134295	364401	1.44012
P23284	PPIB	Peptidyl-prolyl cis-trans isomerase B	23742.5	199327	192462	-0.0505641
P23368	ME2	NAD-dependent malic enzyme, mitochondrial	65443.6	209471	132349	-0.6624
P23381	WARS	Tryptophan--tRNA ligase, cytoplasmic	53165.4	103160	171346	0.732026
P23396	RPS3	40S ribosomal protein S3	26688.3	376663	3.59356e+06	3.25407
P23443	RPS6KB1	Ribosomal protein S6 kinase beta-1	59139.6	171833	393727	1.19619
P23458	JAK1	Tyrosine-protein kinase JAK1	133277	4593.94	89493.7	4.28398
P23469	PTPRE	Receptor-type tyrosine-protein phosphatase epsilon	80641.7	28348.9	40902.5	0.528894
P23470	PTPRG	Receptor-type tyrosine-protein phosphatase gamma	162003	14801.7	84112.9	2.50656
P23490	LOR	Loricrin	25760.7	33635.1	1	-15.0377
P23497	SP100	Nuclear autoantigen Sp-100	100417	55828.2	3.85062e+06	6.10795
P23526	AHCY	Adenosylhomocysteinase	47716.1	256566	1.28626e+06	2.32578
P23528	CFL1	Cofilin-1	18502.5	989398	2.49179e+06	1.33256
P23588	EIF4B	Eukaryotic translation initiation factor 4B	69151.2	344266	1.07087e+06	1.63718
P23610	F8A1	Factor VIII intron 22 protein	39103	79311.4	736185	3.21447
P23634	ATP2B4	Plasma membrane calcium-transporting ATPase 4	137920	28092.5	116664	2.0541
P23743	DGKA	Diacylglycerol kinase alpha	82630.2	778.729	7761.32	3.31711
P23919	DTYMK	Thymidylate kinase	23819.3	79196.6	673656	3.0885
P23921	RRM1	Ribonucleoside-diphosphate reductase large subunit	90070.1	38801.4	269001	2.79343
P24385	CCND1	G1/S-specific cyclin-D1	33729.1	2805.52	17549.6	2.6451
P24386	CHM	Rab proteins geranylgeranyltransferase component A 1	73475.7	3146.55	7277.86	1.20974
P24468	NR2F2	COUP transcription factor 2	45571.2	15047.5	194844	3.69472
P24534	EEF1B2	Elongation factor 1-beta	24763.7	4.29601e+06	1.52353e+07	1.82635
P24539	ATP5F1	ATP synthase F(0) complex subunit B1, mitochondrial	28908.6	29073.3	37590.1	0.370658
P24666	ACP1	Low molecular weight phosphotyrosine protein phosphatase	18042.5	1175.41	121355	6.68993
P24752	ACAT1	Acetyl-CoA acetyltransferase, mitochondrial	45199.6	50315.3	83789.5	0.735771
P24863	CCNC	Cyclin-C	33242.7	3768.79	58926.1	3.96673
P24864	CCNE1	G1/S-specific cyclin-E1	47077.2	1	19288.6	14.2355
P24928	POLR2A	DNA-directed RNA polymerase II subunit RPB1	217176	14122.3	451754	4.99949
P24941	CDK2	Cyclin-dependent kinase 2	33929.5	82626.9	580929	2.81368
P25054	APC	Adenomatous polyposis coli protein	311646	1	53768.9	15.7145
P25098	GRK2	Beta-adrenergic receptor kinase 1	79573.6	9902.58	75129.6	2.92351
P25205	MCM3	DNA replication licensing factor MCM3	90980.8	269841	1.57805e+06	2.54796
P25311	AZGP1	Zinc-alpha-2-glycoprotein	34258.7	34834	21658.6	-0.68556
P25325	MPST	3-mercaptopyruvate sulfurtransferase	33178.5	22067.7	4801.69	-2.20032
P25398	RPS12	40S ribosomal protein S12	14514.9	53137.6	945172	4.15277
P25685	DNAJB1	DnaJ homolog subfamily B member 1	38044.1	22256.2	48027.1	1.10964
P25686	DNAJB2	DnaJ homolog subfamily B member 2	35580.1	12385.9	9546.07	-0.375721
P25705	ATP5A1	ATP synthase subunit alpha, mitochondrial	59750.6	831961	2.04287e+06	1.29601
P25786	PSMA1	Proteasome subunit alpha type-1	29555.6	14581.7	225021	3.94782
P25787	PSMA2	Proteasome subunit alpha type-2	25898.6	42596.6	104595	1.29601
P25788	PSMA3	Proteasome subunit alpha type-3	28433.2	30872	206518	2.74189
P25789	PSMA4	Proteasome subunit alpha type-4	29483.8	167568	359255	1.10026
P26006	ITGA3	Integrin alpha-3	116612	282879	1.15571e+06	2.03052
P26038	MSN	Moesin	67820	498963	1.0983e+06	1.13827
P26045	PTPN3	Tyrosine-protein phosphatase non-receptor type 3	103990	1	32916.6	15.0065
P26196	DDX6	Probable ATP-dependent RNA helicase DDX6	54416.8	155998	897567	2.5245
P26358	DNMT1	DNA (cytosine-5)-methyltransferase 1	183165	1114.01	93373.1	6.38917
P26368	U2AF2	Splicing factor U2AF 65 kDa subunit	53501	20253.2	733957	5.17947
P26373	RPL13	60S ribosomal protein L13	24261.5	43957.2	2.83499e+06	6.0111
P26440	IVD	Isovaleryl-CoA dehydrogenase, mitochondrial	46319.4	271944	140201	-0.955809
P26447	S100A4	Protein S100-A4	11728.5	407598	162112	-1.33016
P26583	HMGB2	High mobility group protein B2	24033.8	29594.8	84589.1	1.51513
P26599	PTBP1	Polypyrimidine tract-binding protein 1	57221.3	404332	2.45222e+06	2.60048
P26639	TARS	Threonine--tRNA ligase, cytoplasmic	83435.1	261722	328369	0.327286
P26640	VARS	Valine--tRNA ligase	140476	144985	431456	1.57331
P26641	EEF1G	Elongation factor 1-gamma	50118.8	1.03092e+07	1.05341e+07	0.0311349
P27144	AK4	Adenylate kinase 4, mitochondrial	25268	166985	427782	1.35715
P27348	YWHAQ	14-3-3 protein theta	27764.2	313909	1.23151e+06	1.97202
P27361	MAPK3	Mitogen-activated protein kinase 3	43135.6	51916.5	36783.8	-0.49712
P27448	MARK3	MAP/microtubule affinity-regulating kinase 3	84488.6	143236	339835	1.24645
P27635	RPL10	60S ribosomal protein L10	24603.9	20653.2	2.48678e+06	6.91177
P27658	COL8A1	Collagen alpha-1(VIII) chain	73364.1	15743.8	181545	3.52747
P27694	RPA1	Replication protein A 70 kDa DNA-binding subunit	68138.2	83961.4	567912	2.75787
P27695	APEX1	DNA-(apurinic or apyrimidinic site) lyase	35554.5	76624.5	316955	2.0484
P27707	DCK	Deoxycytidine kinase	30518.6	521560	642444	0.300738
P27708	CAD	CAD protein	242984	50906	209939	2.04406
P27797	CALR	Calreticulin	48141.6	235742	264468	0.165881
P27815	PDE4A	cAMP-specific 3',5'-cyclic phosphodiesterase 4A	98143.1	2332.3	310359	7.05604
P27816	MAP4	Microtubule-associated protein 4	121005	326827	1.61814e+06	2.30774
P27824	CANX	Calnexin	67568.3	305500	262385	-0.219489
P27986	PIK3R1	Phosphatidylinositol 3-kinase regulatory subunit alpha	83598.4	18404.1	71531.7	1.95856
P28062	PSMB8	Proteasome subunit beta type-8	30354.3	1	16963.2	14.0501
P28065	PSMB9	Proteasome subunit beta type-9	23264.3	2712.99	18430.8	2.76417
P28066	PSMA5	Proteasome subunit alpha type-5	26411	29333.2	275219	3.22997
P28070	PSMB4	Proteasome subunit beta type-4	29204.2	43458.7	90810.4	1.06321
P28072	PSMB6	Proteasome subunit beta type-6	25357.7	8299.89	93644	3.49602
P28074	PSMB5	Proteasome subunit beta type-5	28480.3	37203.6	198152	2.41309
P28161	GSTM2	Glutathione S-transferase Mu 2	25744.7	1.42672e+07	4.16197e+07	1.54456
P28288	ABCD3	ATP-binding cassette sub-family D member 3	75475.9	61081.6	260209	2.09086
P28290	SSFA2	Sperm-specific antigen 2	138386	8332.19	132959	3.99614
P28300	LOX	Protein-lysine 6-oxidase	46944.1	16912.3	171323	3.34057
P28331	NDUFS1	NADH-ubiquinone oxidoreductase 75 kDa subunit, mitochondrial	79467.5	374292	297418	-0.331673
P28340	POLD1	DNA polymerase delta catalytic subunit	123631	83573	310907	1.89537
P28370	SMARCA1	Probable global transcription activator SNF2L1	122605	15326.6	189329	3.62678
P28482	MAPK1	Mitogen-activated protein kinase 1	41389.7	37313.2	273076	2.87155
P28702	RXRB	Retinoic acid receptor RXR-beta	56921.9	43768.4	116191	1.40854
P28715	ERCC5	DNA repair protein complementing XP-G cells	133108	1	29999.5	14.8727
P28749	RBL1	Retinoblastoma-like protein 1	120847	9085.8	100806	3.47182
P28799	GRN	Granulins	63544.4	4425.11	58456.9	3.72359
P28827	PTPRM	Receptor-type tyrosine-protein phosphatase mu	163682	11679.3	36495.8	1.64378
P28838	LAP3	Cytosol aminopeptidase	56166.3	46171.4	156574	1.76177
P29034	S100A2	Protein S100-A2	11116.8	278081	46793.2	-2.57113
P29083	GTF2E1	General transcription factor IIE subunit 1	49452.1	4594.23	12560.5	1.451
P29084	GTF2E2	Transcription initiation factor IIE subunit beta	33043.7	7031.47	24631.9	1.80863
P29144	TPP2	Tripeptidyl-peptidase 2	138350	46433.6	67812.9	0.546391
P29218	IMPA1	Inositol monophosphatase 1	30188.8	36364.8	73440	1.01402
P29279	CTGF	Connective tissue growth factor	38091.4	16644.4	30699.3	0.883168
P29317	EPHA2	Ephrin type-A receptor 2	108266	65681.4	179977	1.45425
P29323	EPHB2	Ephrin type-B receptor 2	117493	4014.55	11167.6	1.47601
P29353	SHC1	SHC-transforming protein 1	62822.1	54609.4	334437	2.61451
P29372	MPG	DNA-3-methyladenine glycosylase	32868.7	879.051	22457.7	4.67512
P29401	TKT	Transketolase	67877.6	102706	141002	0.457205
P29508	SERPINB3	Serpin B3	44564.6	68935	57812.3	-0.253859
P29558	RBMS1	RNA-binding motif, single-stranded-interacting protein 1	44505.3	7057.92	1.05506e+06	7.22387
P29590	PML	Protein PML	97550.6	77116.7	1.44121e+06	4.22409
P29597	TYK2	Non-receptor tyrosine-protein kinase TYK2	133650	3041.14	59378.1	4.28725
P29692	EEF1D	Elongation factor 1-delta	31121.8	833297	1.15687e+06	0.473318
P29966	MARCKS	Myristoylated alanine-rich C-kinase substrate	31554.7	477800	575569	0.268582
P29992	GNA11	Guanine nucleotide-binding protein subunit alpha-11	42123.3	28339.3	284200	3.32603
P30038	ALDH4A1	Delta-1-pyrroline-5-carboxylate dehydrogenase, mitochondrial	61719.5	4748.37	13293.5	1.48522
P30040	ERP29	Endoplasmic reticulum resident protein 29	28993.4	85809.9	61934.9	-0.470392
P30041	PRDX6	Peroxiredoxin-6	25035	563128	997083	0.82425
P30044	PRDX5	Peroxiredoxin-5, mitochondrial	22086.4	84378.7	55696.9	-0.599282
P30048	PRDX3	Thioredoxin-dependent peroxide reductase, mitochondrial	27692.7	114833	83613.4	-0.457729
P30049	ATP5D	ATP synthase subunit delta, mitochondrial	17490	33919	101993	1.58831
P30050	RPL12	60S ribosomal protein L12	17818.6	176894	2.61126e+06	3.88379
P30084	ECHS1	Enoyl-CoA hydratase, mitochondrial	31387.4	56394.2	130803	1.21378
P30085	CMPK1	UMP-CMP kinase	22222.3	64387.6	77178.1	0.261408
P30101	PDIA3	Protein disulfide-isomerase A3	56782.4	762961	658535	-0.212349
P30153	PPP2R1A	Serine/threonine-protein phosphatase 2A 65 kDa regulatory subunit A alpha isoform	65308.6	528438	956416	0.855905
P30154	PPP2R1B	Serine/threonine-protein phosphatase 2A 65 kDa regulatory subunit A beta isoform	66213.5	27742.9	154017	2.4729
P30260	CDC27	Cell division cycle protein 27 homolog	91867.3	31011.8	210849	2.76532
P30291	WEE1	Wee1-like protein kinase	71597.4	484434	1.34877e+06	1.47727
P30305	CDC25B	M-phase inducer phosphatase 2	64987.5	1	21898.9	14.4186
P30307	CDC25C	M-phase inducer phosphatase 3	53364.7	1896.49	16006.4	3.07724
P30414	NKTR	NK-tumor recognition protein	165676	1	54509.1	15.7342
P30419	NMT1	Glycylpeptide N-tetradecanoyltransferase 1	56806.2	52634	815046	3.95281
P30508	HLA-C	HLA class I histocompatibility antigen, Cw-12 alpha chain	40885.8	66978.8	111811	0.739281
P30519	HMOX2	Heme oxygenase 2	36032.9	14527.6	26792.8	0.883049
P30520	ADSS	Adenylosuccinate synthetase isozyme 2	50097.4	446173	644517	0.530617
P30530	AXL	Tyrosine-protein kinase receptor UFO	98335.7	120783	332662	1.46164
P30533	LRPAP1	Alpha-2-macroglobulin receptor-associated protein	41466	16755.5	1957.44	-3.09759
P30536	TSPO	Translocator protein	18827.9	5649.79	37865.3	2.74461
P30566	ADSL	Adenylosuccinate lyase	54889.3	240122	600856	1.32325
P30622	CLIP1	CAP-Gly domain-containing linker protein 1	162246	33673.8	211234	2.64915
P30626	SRI	Sorcin	21676.4	1	87140.1	16.411
P30679	GNA15	Guanine nucleotide-binding protein subunit alpha-15	43568	6016.28	8391.44	0.480048
P30740	SERPINB1	Leukocyte elastase inhibitor	42741.8	716540	210746	-1.76554
P30825	SLC7A1	High affinity cationic amino acid transporter 1	67638.4	35711.5	168922	2.2419
P30837	ALDH1B1	Aldehyde dehydrogenase X, mitochondrial	57206.3	75965.5	170077	1.16277
P30876	POLR2B	DNA-directed RNA polymerase II subunit RPB2	133897	26247.2	1.69786e+06	6.01541
P31025;Q5VSP4	LCN1;LCN1P1	Lipocalin-1;Putative lipocalin 1-like protein 1	19250.01;17918.44	13974.4	35174.7	1.33175
P31040	SDHA	Succinate dehydrogenase [ubiquinone] flavoprotein subunit, mitochondrial	72691.5	1852.47	7763.02	2.06717
P31150	GDI1	Rab GDP dissociation inhibitor alpha	50582.7	14958.6	22856.8	0.611646
P31151	S100A7	Protein S100-A7	11471	26971.4	81842.9	1.60143
P31153	MAT2A	S-adenosylmethionine synthase isoform type-2	43660.7	213406	129674	-0.718706
P31327	CPS1	Carbamoyl-phosphate synthase [ammonia], mitochondrial	164939	10635.4	67902.6	2.67459
P31350	RRM2	Ribonucleoside-diphosphate reductase subunit M2	44877.7	68747.3	69698.5	0.0198254
P31641	SLC6A6	Sodium- and chloride-dependent taurine transporter	69830.1	23639.9	144886	2.61562
P31689	DNAJA1	DnaJ homolog subfamily A member 1	44868.2	21797.8	148470	2.76792
P31749	AKT1	RAC-alpha serine/threonine-protein kinase	55686.4	27490.5	325402	3.56522
P31751	AKT2	RAC-beta serine/threonine-protein kinase	55768.8	11873.4	79334.2	2.74021
P31930	UQCRC1	Cytochrome b-c1 complex subunit 1, mitochondrial	52645.8	195830	152175	-0.363871
P31937	HIBADH	3-hydroxyisobutyrate dehydrogenase, mitochondrial	35328.9	3308.86	1529.37	-1.1134
P31939	ATIC	Bifunctional purine biosynthesis protein PURH	64615.9	34870.3	85221.8	1.28922
P31942	HNRNPH3	Heterogeneous nuclear ribonucleoprotein H3	36926.5	17596.2	61860.5	1.81376
P31943	HNRNPH1	Heterogeneous nuclear ribonucleoprotein H	49229.5	345481	1.89685e+06	2.45693
P31944	CASP14	Caspase-14	27679.5	36955.9	33540.2	-0.139915
P31946	YWHAB	14-3-3 protein beta/alpha	28082.4	558985	2.51923e+06	2.1721
P31947	SFN	14-3-3 protein sigma	27774.1	58443.4	216889	1.89185
P31948	STIP1	Stress-induced-phosphoprotein 1	62639.2	255072	170115	-0.584393
P31949	S100A11	Protein S100-A11	11740.4	49462.8	73304.9	0.567567
P32004	L1CAM	Neural cell adhesion molecule L1	140003	12354.3	30903	1.32273
P32019	INPP5B	Type II inositol 1,4,5-trisphosphate 5-phosphatase	112852	3488.69	8533.47	1.29045
P32119	PRDX2	Peroxiredoxin-2	21891.9	205752	529616	1.36404
P32189;Q14409	GK;GK3P	Glycerol kinase;Glycerol kinase 3	61244.63;60597.89	5687.43	20685.7	1.86279
P32321	DCTD	Deoxycytidylate deaminase	20016	11426.7	50744.1	2.15083
P32322	PYCR1	Pyrroline-5-carboxylate reductase 1, mitochondrial	33360.6	76136.8	320608	2.07414
P32455	GBP1	Guanylate-binding protein 1	67930.7	28452.2	127945	2.16891
P32456	GBP2	Guanylate-binding protein 2	67209	33780.6	125000	1.88767
P32780	GTF2H1	General transcription factor IIH subunit 1	62031.6	9914.43	75014.7	2.91957
P32969	RPL9	60S ribosomal protein L9	21863.4	11459.7	951165	6.37505
P33121	ACSL1	Long-chain-fatty-acid--CoA ligase 1	77943.3	77672.3	495208	2.67256
P33176	KIF5B	Kinesin-1 heavy chain	109685	137061	265357	0.953116
P33240	CSTF2	Cleavage stimulation factor subunit 2	60959.5	9543.43	16230.9	0.766164
P33316	DUT	Deoxyuridine 5'-triphosphate nucleotidohydrolase, mitochondrial	26563.2	185055	233761	0.337075
P33527	ABCC1	Multidrug resistance-associated protein 1	171591	20989.7	45486.6	1.11576
P33897	ABCD1	ATP-binding cassette sub-family D member 1	82936.9	1445.48	10244.7	2.82525
P33981	TTK	Dual specificity protein kinase TTK	97072.3	2253.78	16165.2	2.84248
P33991	MCM4	DNA replication licensing factor MCM4	96557.9	123056	562770	2.19323
P33992	MCM5	DNA replication licensing factor MCM5	82285.5	223389	743857	1.73547
P33993	MCM7	DNA replication licensing factor MCM7	81307.9	559531	2.12498e+06	1.92516
P34059	GALNS	N-acetylgalactosamine-6-sulfatase	58026	6263.99	1	-12.6129
P34896	SHMT1	Serine hydroxymethyltransferase, cytosolic	53082.6	5084.93	21723.2	2.09494
P34897	SHMT2	Serine hydroxymethyltransferase, mitochondrial	55993	24437.1	123302	2.33505
P34910	EVI2B	Protein EVI2B	48666.2	6874.04	1	-12.7469
P34931	HSPA1L	Heat shock 70 kDa protein 1-like	70375.1	7712.86	24291.4	1.65511
P34932	HSPA4	Heat shock 70 kDa protein 4	94330.9	140071	286845	1.03412
P34947	GRK5	G protein-coupled receptor kinase 5	67786.6	14655.8	6230.06	-1.23416
P34949	MPI	Mannose-6-phosphate isomerase	46655.9	25398.5	26889.7	0.082306
P35030	PRSS3	Trypsin-3	32528.8	105819	92721	-0.190627
P35080	PFN2	Profilin-2	15046.2	10504.4	10942.3	0.0589311
P35221	CTNNA1	Catenin alpha-1	100071	91210.3	164382	0.849782
P35222	CTNNB1	Catenin beta-1	85496.6	43947.4	661191	3.91122
P35227	PCGF2	Polycomb group RING finger protein 2	37788.1	3972.67	28031.2	2.81886
P35232	PHB	Prohibitin	29804.1	80818.8	572960	2.82567
P35237	SERPINB6	Serpin B6	42621.9	968315	265169	-1.86856
P35241	RDX	Radixin	68563.9	801048	2.45696e+06	1.61691
P35244	RPA3	Replication protein A 14 kDa subunit	13568.7	11166.5	71328.4	2.6753
P35249	RFC4	Replication factor C subunit 4	39681.8	21994.7	139731	2.66742
P35250	RFC2	Replication factor C subunit 2	39157.3	13620.5	78012.4	2.51792
P35251	RFC1	Replication factor C subunit 1	128255	1	70298.6	16.1012
P35268	RPL22	60S ribosomal protein L22	14787	749517	4.97308e+06	2.73011
P35269	GTF2F1	General transcription factor IIF subunit 1	58240.4	56020.3	437631	2.96569
P35270	SPR	Sepiapterin reductase	28048.5	63831.2	75663.8	0.245342
P35527	KRT9	Keratin, type I cytoskeletal 9	62064.3	6.50633e+06	6.09356e+06	-0.0945592
P35568	IRS1	Insulin receptor substrate 1	131591	6047.85	1.07492e+06	7.4736
P35573	AGL	Glycogen debranching enzyme	174764	1918.18	3397.63	0.824794
P35579	MYH9	Myosin-9	226532	232281	504860	1.12001
P35580	MYH10	Myosin-10	228999	139895	409686	1.55017
P35606	COPB2	Coatomer subunit beta'	102487	161978	359164	1.14885
P35609	ACTN2	Alpha-actinin-2	103854	82475	100142	0.280018
P35610	SOAT1	Sterol O-acyltransferase 1	64734.6	27746.6	52736.6	0.926496
P35611	ADD1	Alpha-adducin	80955.1	74982	556100	2.89073
P35613	BSG	Basigin	42200.4	33376.2	424126	3.6676
P35625	TIMP3	Metalloproteinase inhibitor 3	24145	5793.04	104259	4.16971
P35637	FUS	RNA-binding protein FUS	53425.8	184867	987037	2.41661
P35658	NUP214	Nuclear pore complex protein Nup214	213620	21421	80114.9	1.90304
P35659	DEK	Protein DEK	42674.3	6350.63	61927.3	3.2856
P35754	GLRX	Glutaredoxin-1	11775.7	303481	55918.8	-2.4402
P35790	CHKA	Choline kinase alpha	52249	18602.4	18793.5	0.0147483
P35813	PPM1A	Protein phosphatase 1A	42447.7	3333.33	20349.2	2.60994
P35869	AHR	Aryl hydrocarbon receptor	96147.4	47757.8	97618.3	1.03141
P35908	KRT2	Keratin, type II cytoskeletal 2 epidermal	65432.9	6.81123e+06	5.10059e+06	-0.417251
P35914	HMGCL	Hydroxymethylglutaryl-CoA lyase, mitochondrial	34360.1	51853.9	58087.8	0.163783
P35998	PSMC2	26S proteasome regulatory subunit 7	48633.8	370194	504004	0.445151
P36404	ARL2	ADP-ribosylation factor-like protein 2	20878	136792	71250.1	-0.941024
P36405	ARL3	ADP-ribosylation factor-like protein 3	20455.5	1	32731.3	14.9984
P36507	MAP2K2	Dual specificity mitogen-activated protein kinase kinase 2	44424.1	54793.7	178023	1.69998
P36542	ATP5C1	ATP synthase subunit gamma, mitochondrial	32996	326124	827183	1.34279
P36543	ATP6V1E1	V-type proton ATPase subunit E 1	26145.3	27908.8	26530.5	-0.0730671
P36551	CPOX	Oxygen-dependent coproporphyrinogen-III oxidase, mitochondrial	50151.9	806458	177764	-2.18163
P36578	RPL4	60S ribosomal protein L4	47697.3	15088.8	1.88247e+06	6.96301
P36639	NUDT1	7,8-dihydro-8-oxoguanine triphosphatase	22519.6	1	38288.4	15.2246
P36776	LONP1	Lon protease homolog, mitochondrial	106489	146531	619251	2.07932
P36871	PGM1	Phosphoglucomutase-1	61449.1	249233	386571	0.633236
P36873	PPP1CC	Serine/threonine-protein phosphatase PP1-gamma catalytic subunit	36983.8	39873.6	766188	4.26419
P36897	TGFBR1	TGF-beta receptor type-1	55959.7	11948.7	27023.1	1.17734
P36915	GNL1	Guanine nucleotide-binding protein-like 1	68660.9	8496.92	239968	4.81976
P36954	POLR2I	DNA-directed RNA polymerase II subunit RPB9	14523.2	8122.02	220658	4.76383
P36956	SREBF1	Sterol regulatory element-binding protein 1	121675	21636.2	107789	2.31669
P36957	DLST	Dihydrolipoyllysine-residue succinyltransferase component of 2-oxoglutarate dehydrogenase complex, mitochondrial	48755.3	50816.4	446168	3.13422
P36969	GPX4	Phospholipid hydroperoxide glutathione peroxidase, mitochondrial	22174.7	37936.8	53204.6	0.487954
P37108	SRP14	Signal recognition particle 14 kDa protein	14569.9	200713	303876	0.598352
P37173	TGFBR2	TGF-beta receptor type-2	64567.7	6624.29	20328.1	1.61764
P37198	NUP62	Nuclear pore glycoprotein p62	53254.9	18123.9	74371.6	2.03686
P37802	TAGLN2	Transgelin-2	22391.4	260181	680031	1.38608
P37837	TALDO1	Transaldolase	37540.1	30933	69888.2	1.1759
P38117	ETFB	Electron transfer flavoprotein subunit beta	27843.6	18255.5	42647.2	1.22412
P38159	RBMX	RNA-binding motif protein, X chromosome	42331.8	40792.6	632632	3.95499
P38398	BRCA1	Breast cancer type 1 susceptibility protein	207721	1	21334.8	14.3809
P38432	COIL	Coilin	62608.3	2629.34	39630.4	3.91384
P38571	LIPA	Lysosomal acid lipase/cholesteryl ester hydrolase	45419	41292.2	44388.4	0.104314
P38606	ATP6V1A	V-type proton ATPase catalytic subunit A	68304.1	206159	412299	0.999937
P38646	HSPA9	Stress-70 protein, mitochondrial	73680.5	2.47501e+06	4.23093e+06	0.773541
P38919	EIF4A3	Eukaryotic initiation factor 4A-III	46871	235054	1.52016e+06	2.69316
P38935	IGHMBP2	DNA-binding protein SMUBP-2	109149	24946.3	247956	3.31318
P38936	CDKN1A	Cyclin-dependent kinase inhibitor 1	18119.3	1	2703.64	11.4007
P39019	RPS19	40S ribosomal protein S19	16060.5	495902	5.60488e+06	3.49856
P39023	RPL3	60S ribosomal protein L3	46108.9	14453.6	629390	5.44445
P39656	DDOST	Dolichyl-diphosphooligosaccharide--protein glycosyltransferase 48 kDa subunit	50800.8	247685	364498	0.557402
P39687	ANP32A	Acidic leucine-rich nuclear phosphoprotein 32 family member A	28585.4	9812.45	15481.7	0.65788
P39748	FEN1	Flap endonuclease 1	42593	299516	740011	1.30492
P39880	CUX1	Homeobox protein cut-like 1	164187	9474.96	57966	2.61301
P40121	CAPG	Macrophage-capping protein	38498.5	22907.9	44834.2	0.968752
P40123	CAP2	Adenylyl cyclase-associated protein 2	52823.9	23634.8	75048.6	1.66692
P40189	IL6ST	Interleukin-6 receptor subunit beta	103537	8313.54	189014	4.50689
P40222	TXLNA	Alpha-taxilin	61891.1	45536.7	190775	2.06677
P40227	CCT6A	T-complex protein 1 subunit zeta	58024.2	408000	1.1458e+06	1.48971
P40261	NNMT	Nicotinamide N-methyltransferase	29574	97508.7	579398	2.57095
P40306	PSMB10	Proteasome subunit beta type-10	28936.3	1	25580.6	14.6428
P40425	PBX2	Pre-B-cell leukemia transcription factor 2	45881.3	6730.94	4564.82	-0.560252
P40429	RPL13A	60S ribosomal protein L13a	23577.2	18002.8	1.24506e+06	6.11184
P40616	ARL1	ADP-ribosylation factor-like protein 1	20417.5	14093.6	33701.9	1.25779
P40692	MLH1	DNA mismatch repair protein Mlh1	84601	8382.12	103637	3.62807
P40763	STAT3	Signal transducer and activator of transcription 3	88067.8	170517	447026	1.39045
P40818	USP8	Ubiquitin carboxyl-terminal hydrolase 8	127523	17487.6	33695.1	0.946208
P40855	PEX19	Peroxisomal biogenesis factor 19	32806.5	7263.54	17577.6	1.27499
P40925	MDH1	Malate dehydrogenase, cytoplasmic	36426.1	117113	70086.5	-0.740698
P40926	MDH2	Malate dehydrogenase, mitochondrial	35503.3	29098.1	84165.7	1.53231
P40937	RFC5	Replication factor C subunit 5	38496.6	53109.9	121686	1.19611
P40938	RFC3	Replication factor C subunit 3	40556.3	28990.3	77605.4	1.42059
P40939	HADHA	Trifunctional enzyme subunit alpha, mitochondrial	82999.6	123469	844648	2.7742
P41091	EIF2S3	Eukaryotic translation initiation factor 2 subunit 3	51109.5	209696	1.01726e+06	2.27832
P41161	ETV5	ETS translocation variant 5	57838	2070.04	502084	7.92212
P41162	ETV3	ETS translocation variant 3	57001.3	7019.24	57695.2	3.03907
P41182	BCL6	B-cell lymphoma 6 protein	78846.5	1	36305.9	15.1479
P41212	ETV6	Transcription factor ETV6	52999.9	3959.79	1.1102e+06	8.13117
P41214	EIF2D	Eukaryotic translation initiation factor 2D	64706.5	18647.8	93734.6	2.32958
P41223	BUD31	Protein BUD31 homolog	16999.7	20541.1	75335.6	1.87482
P41226	UBA7	Ubiquitin-like modifier-activating enzyme 7	111694	2332.82	2596.79	0.154655
P41227	NAA10	N-alpha-acetyltransferase 10	26458.5	26486.7	18347.5	-0.529682
P41229	KDM5C	Lysine-specific demethylase 5C	175720	14633.5	48448.1	1.72716
P41236	PPP1R2	Protein phosphatase inhibitor 2	23015.2	5818.8	12865.8	1.14475
P41240	CSK	Tyrosine-protein kinase CSK	50704.3	39289.3	310887	2.98418
P41250	GARS	Glycine--tRNA ligase	83165.6	490913	830871	0.759158
P41252	IARS	Isoleucine--tRNA ligase, cytoplasmic	144498	141874	271337	0.935477
P41567	EIF1	Eukaryotic translation initiation factor 1	12732.5	12593	25770.5	1.0331
P41743	PRKCI	Protein kinase C iota type	68262.4	23482.5	472235	4.32985
P41970	ELK3	ETS domain-containing protein Elk-3	44239.6	1	36572	15.1585
P42025	ACTR1B	Beta-centractin	42293.4	24871.6	75692.8	1.60566
P42126	ECI1	Enoyl-CoA delta isomerase 1, mitochondrial	32816	5701.86	15765.8	1.46729
P42166	TMPO	Lamina-associated polypeptide 2, isoform alpha	75492.1	79380.9	590347	2.8947
P42167	TMPO	Lamina-associated polypeptide 2, isoforms beta/gamma	50670.2	10122.7	168820	4.05982
P42224	STAT1	Signal transducer and activator of transcription 1-alpha/beta	87334.8	256337	831058	1.6969
P42226	STAT6	Signal transducer and activator of transcription 6	94135.1	33344.4	150196	2.17133
P42285	MTREX	Exosome RNA helicase MTR4	117805	14670.6	434946	4.88984
P42330	AKR1C3	Aldo-keto reductase family 1 member C3	36853.2	20348.6	28423.2	0.482139
P42336	PIK3CA	Phosphatidylinositol 4,5-bisphosphate 3-kinase catalytic subunit alpha isoform	124284	2947.66	6514.55	1.14409
P42338	PIK3CB	Phosphatidylinositol 4,5-bisphosphate 3-kinase catalytic subunit beta isoform	122762	8638.79	66604	2.94671
P42345	MTOR	Serine/threonine-protein kinase mTOR	288892	1	17470.8	14.0927
P42356	PI4KA	Phosphatidylinositol 4-kinase alpha	236830	139.447	11753.6	6.39724
P42566	EPS15	Epidermal growth factor receptor substrate 15	98655.7	53440.9	384785	2.84804
P42568	MLLT3	Protein AF-9	63351.4	1	5324.3	12.3784
P42574	CASP3	Caspase-3	31607.9	44186.8	63508.9	0.523345
P42677	RPS27	40S ribosomal protein S27	9461.12	55683.6	1.16753e+06	4.39006
P42680	TEC	Tyrosine-protein kinase Tec	73581.2	5089.09	53319.2	3.38917
P42684	ABL2	Abelson tyrosine-protein kinase 2	128343	11496.7	91721.8	2.99605
P42694	HELZ	Probable helicase with zinc finger domain	218970	1	19781	14.2718
P42695	NCAPD3	Condensin-2 complex subunit D3	168891	1	13496.5	13.7203
P42696	RBM34	RNA-binding protein 34	48564.8	31737.4	161783	2.3498
P42704	LRPPRC	Leucine-rich PPR motif-containing protein, mitochondrial	157905	112684	803896	2.83472
P42765	ACAA2	3-ketoacyl-CoA thiolase, mitochondrial	41924.2	11548	2451.35	-2.236
P42766	RPL35	60S ribosomal protein L35	14551.5	24348.6	1.87873e+06	6.26978
P42785	PRCP	Lysosomal Pro-X carboxypeptidase	55799.8	1064.74	11170.9	3.39116
P42892	ECE1	Endothelin-converting enzyme 1	87163.7	14417.7	39408.8	1.45067
P42898	MTHFR	Methylenetetrahydrofolate reductase	74596.6	601.533	11607.8	4.27031
P43007	SLC1A4	Neutral amino acid transporter A	55723.1	6069.54	36289.3	2.57989
P43034	PAFAH1B1	Platelet-activating factor acetylhydrolase IB subunit alpha	46638	12054.1	4349.79	-1.47051
P43155	CRAT	Carnitine O-acetyltransferase	70857.6	6328.05	10866.6	0.780062
P43243	MATR3	Matrin-3	94623.2	31153.6	478010	3.93957
P43246	MSH2	DNA mismatch repair protein Msh2	104743	2.99565e+06	303701	-3.30214
P43250	GRK6	G protein-coupled receptor kinase 6	65991	5113.58	42886.6	3.06812
P43251	BTD	Biotinidase	61132.9	2579.58	11447.5	2.14982
P43268	ETV4	ETS translocation variant 4	53938.2	4360.13	55538.6	3.67105
P43304	GPD2	Glycerol-3-phosphate dehydrogenase, mitochondrial	80852.7	221458	538223	1.28117
P43307	SSR1	Translocon-associated protein subunit alpha	32235.3	100245	923850	3.20413
P43353	ALDH3B1	Aldehyde dehydrogenase family 3 member B1	51839.7	5751.5	35528	2.62695
P43378	PTPN9	Tyrosine-protein phosphatase non-receptor type 9	68020	10207.8	96897.9	3.2468
P43487	RANBP1	Ran-specific GTPase-activating protein	23310.1	32576.6	15914.7	-1.03347
P43490	NAMPT	Nicotinamide phosphoribosyltransferase	55521.2	1.65542e+06	4.39035e+06	1.40714
P43686	PSMC4	26S proteasome regulatory subunit 6B	47366.2	503036	687699	0.451117
P43897	TSFM	Elongation factor Ts, mitochondrial	35390.7	21834.9	50643.6	1.21374
P45880	VDAC2	Voltage-dependent anion-selective channel protein 2	31566.5	89708	345819	1.94671
P45954	ACADSB	Short/branched chain specific acyl-CoA dehydrogenase, mitochondrial	47485.4	81508	68474.4	-0.251376
P45974	USP5	Ubiquitin carboxyl-terminal hydrolase 5	95786.3	88972.9	181837	1.0312
P45983	MAPK8	Mitogen-activated protein kinase 8	48295.6	14167.1	1	-13.7903
P45984	MAPK9	Mitogen-activated protein kinase 9	48139.1	27121.3	70989.4	1.38818
P45985	MAP2K4	Dual specificity mitogen-activated protein kinase kinase 4	44287.7	42125.3	105635	1.32634
P46013	MKI67	Proliferation marker protein Ki-67	358694	10045.2	65389	2.70255
P46019	PHKA2	Phosphorylase b kinase regulatory subunit alpha, liver isoform	138408	1309.77	14361	3.45477
P46020	PHKA1	Phosphorylase b kinase regulatory subunit alpha, skeletal muscle isoform	137312	5711.92	25696.6	2.16953
P46060	RANGAP1	Ran GTPase-activating protein 1	63541.9	165346	387548	1.22889
P46063	RECQL	ATP-dependent DNA helicase Q1	73457.3	54516.1	117504	1.10795
P46087	NOP2	Probable 28S rRNA (cytosine(4447)-C(5))-methyltransferase	89301.8	1	253674	17.9526
P46100	ATRX	Transcriptional regulator ATRX	282586	1	26949.7	14.718
P46108	CRK	Adapter molecule crk	33830.7	6616.61	7338.45	0.149383
P46109	CRKL	Crk-like protein	33777	87563.4	346473	1.98434
P46199	MTIF2	Translation initiation factor IF-2, mitochondrial	81317.4	29166.9	166694	2.5148
P46379	BAG6	Large proline-rich protein BAG6	119409	217117	516663	1.25075
P46439	GSTM5	Glutathione S-transferase Mu 5	25674.7	10089.4	18291.1	0.858309
P46459	NSF	Vesicle-fusing ATPase	82594.3	233534	683795	1.54993
P46527	CDKN1B	Cyclin-dependent kinase inhibitor 1B	22073.3	1	4293.74	12.068
P46531	NOTCH1	Neurogenic locus notch homolog protein 1	272505	5430.12	78429.3	3.85234
P46734	MAP2K3	Dual specificity mitogen-activated protein kinase kinase 3	39318.4	30297.4	332588	3.45647
P46736	BRCC3	Lys-63-specific deubiquitinase BRCC36	36071.9	10240.5	543783	5.73067
P46776	RPL27A	60S ribosomal protein L27a	16561.4	65461.6	3.76113e+06	5.84437
P46777	RPL5	60S ribosomal protein L5	34362.6	35896.7	1.61967e+06	5.49571
P46778	RPL21	60S ribosomal protein L21	18564.8	10853.6	990743	6.51226
P46779	RPL28	60S ribosomal protein L28	15747.5	20519.8	2.26711e+06	6.78769
P46781	RPS9	40S ribosomal protein S9	22591.4	157054	7.07122e+06	5.49263
P46782	RPS5	40S ribosomal protein S5	22876.4	485478	4.86308e+06	3.32439
P46783	RPS10	40S ribosomal protein S10	18897.8	160113	3.73293e+06	4.54314
P46821	MAP1B	Microtubule-associated protein 1B	270634	93855.8	1.15799e+06	3.62503
P46926	GNPDA1	Glucosamine-6-phosphate isomerase 1	32668.5	7333.88	14293	0.962666
P46934	NEDD4	E3 ubiquitin-protein ligase NEDD4	149114	235278	543445	1.20777
P46937	YAP1	Transcriptional coactivator YAP1	54461.5	5667.72	66810.2	3.55923
P46939	UTRN	Utrophin	394466	8316.94	40026.5	2.26683
P46940	IQGAP1	Ras GTPase-activating-like protein IQGAP1	189252	728921	3.03091e+06	2.05592
P46976	GYG1	Glycogenin-1	39383.8	7657.12	1	-12.9026
P46977	STT3A	Dolichyl-diphosphooligosaccharide--protein glycosyltransferase subunit STT3A	80529.6	94595.9	264996	1.48612
P47224	RABIF	Guanine nucleotide exchange factor MSS4	13838.8	1	19241.7	14.2319
P47736	RAP1GAP	Rap1 GTPase-activating protein 1	73361.4	305.777	27904.1	6.51185
P47755	CAPZA2	F-actin-capping protein subunit alpha-2	32949.1	364474	1.00098e+06	1.45753
P47756	CAPZB	F-actin-capping protein subunit beta	31350.5	446459	1.90067e+06	2.08991
P47897	QARS	Glutamine--tRNA ligase	87798.7	398045	678114	0.768595
P47914	RPL29	60S ribosomal protein L29	17752.1	1113.05	1.18995e+06	10.0622
P47929	LGALS7	Galectin-7	15075	178.607	1728.32	3.27451
P47974	ZFP36L2	mRNA decay activator protein ZFP36L2	51062.8	7791.32	316516	5.34427
P47985	UQCRFS1	Cytochrome b-c1 complex subunit Rieske, mitochondrial	29668	58290.3	87125.4	0.579837
P48047	ATP5O	ATP synthase subunit O, mitochondrial	23277.3	504815	1.72349e+06	1.77151
P48059	LIMS1	LIM and senescent cell antigen-like-containing domain protein 1	37251.3	45582.2	354402	2.95884
P48060	GLIPR1	Glioma pathogenesis-related protein 1	30365.9	4368.32	1	-12.0929
P48147	PREP	Prolyl endopeptidase	80699.5	14996.6	28042.1	0.902954
P48200	IREB2	Iron-responsive element-binding protein 2	105045	1631.73	26324.3	4.01192
P48382	RFX5	DNA-binding protein RFX5	65323	1	4809.08	12.2315
P48426	PIP4K2A	Phosphatidylinositol 5-phosphate 4-kinase type-2 alpha	46224.6	31812.7	1.30445e+06	5.35769
P48436	SOX9	Transcription factor SOX-9	56137.1	5706.3	493555	6.43451
P48444	ARCN1	Coatomer subunit delta	57210.4	347503	1.42609e+06	2.03697
P48449	LSS	Lanosterol synthase	83308.7	12337	52364.5	2.0856
P48506	GCLC	Glutamate--cysteine ligase catalytic subunit	72765.8	10358.1	17692	0.772338
P48507	GCLM	Glutamate--cysteine ligase regulatory subunit	30727	87535.3	154748	0.821986
P48553	TRAPPC10	Trafficking protein particle complex subunit 10	142189	4722.41	20168.2	2.09449
P48556	PSMD8	26S proteasome non-ATPase regulatory subunit 8	39611.9	191257	526871	1.46194
P48634	PRRC2A	Protein PRRC2A	228863	2569.19	161532	5.97437
P48643	CCT5	T-complex protein 1 subunit epsilon	59671	278542	835525	1.58479
P48651	PTDSS1	Phosphatidylserine synthase 1	55527.6	10958.9	71537	2.70659
P48668	KRT6C	Keratin, type II cytoskeletal 6C	60024.9	20788	44289.7	1.09122
P48723	HSPA13	Heat shock 70 kDa protein 13	51927.4	25101.8	22877.5	-0.133862
P48729	CSNK1A1	Casein kinase I isoform alpha	38914.8	362692	202416	-0.841424
P48730	CSNK1D	Casein kinase I isoform delta	47330.1	13995.1	200296	3.83915
P48735	IDH2	Isocitrate dehydrogenase [NADP], mitochondrial	50909.3	349540	371346	0.0873066
P48739	PITPNB	Phosphatidylinositol transfer protein beta isoform	31540.1	35807.1	13256.7	-1.43352
P48960	CD97	CD97 antigen	91869.3	75547.8	307562	2.02542
P49005	POLD2	DNA polymerase delta subunit 2	51289.5	19900.2	237799	3.57888
P49006	MARCKSL1	MARCKS-related protein	19528.8	9291.67	1996.94	-2.21815
P49023	PXN	Paxillin	64505.3	50179.7	305276	2.60494
P49069	CAMLG	Calcium signal-modulating cyclophilin ligand	32952.6	41266.5	8338	-2.3072
P49137	MAPKAPK2	MAP kinase-activated protein kinase 2	45567.8	103634	283646	1.45259
P49189	ALDH9A1	4-trimethylaminobutyraldehyde dehydrogenase	53801.9	1.5874e+07	833118	-4.252
P49207	RPL34	60S ribosomal protein L34	13293	12924.2	1.52129e+06	6.87907
P49247	RPIA	Ribose-5-phosphate isomerase	33268.9	83296.9	102917	0.305149
P49257	LMAN1	Protein ERGIC-53	57548.9	24979.9	325870	3.70546
P49321	NASP	Nuclear autoantigenic sperm protein	85237.7	100857	197500	0.96954
P49327	FASN	Fatty acid synthase	273427	960847	660877	-0.539925
P49336	CDK8	Cyclin-dependent kinase 8	53283.7	1	295502	18.1728
P49354	FNTA	Protein farnesyltransferase/geranylgeranyltransferase type-1 subunit alpha	44408.6	20604.6	76911.8	1.90024
P49356	FNTB	Protein farnesyltransferase subunit beta	48773.6	38851.9	82002.5	1.07768
P49366	DHPS	Deoxyhypusine synthase	40970.6	4982.32	14325.3	1.52367
P49368	CCT3	T-complex protein 1 subunit gamma	60533.9	880048	3.34647e+06	1.92699
P49406	MRPL19	39S ribosomal protein L19, mitochondrial	33534.9	53305.4	47565.4	-0.164371
P49407	ARRB1	Beta-arrestin-1	47065.7	10610.5	142570	3.74811
P49411	TUFM	Elongation factor Tu, mitochondrial	49541.5	485523	887814	0.870716
P49419	ALDH7A1	Alpha-aminoadipic semialdehyde dehydrogenase	58487.2	14550.9	71116.2	2.28907
P49427	CDC34	Ubiquitin-conjugating enzyme E2 R1	26736.8	27730.3	38353.8	0.467905
P49441	INPP1	Inositol polyphosphate 1-phosphatase	43998	7289.22	21304	1.54729
P49458	SRP9	Signal recognition particle 9 kDa protein	10111.7	18249.3	64338.5	1.81784
P49459	UBE2A	Ubiquitin-conjugating enzyme E2 A	17315.4	1	37593.1	15.1982
P49585	PCYT1A	Choline-phosphate cytidylyltransferase A	41731	47083.6	643373	3.77236
P49588	AARS	Alanine--tRNA ligase, cytoplasmic	106810	106984	151333	0.500329
P49589	CARS	Cysteine--tRNA ligase, cytoplasmic	85473.3	278373	336447	0.273362
P49591	SARS	Serine--tRNA ligase, cytoplasmic	58777.3	258912	604993	1.22445
P49593	PPM1F	Protein phosphatase 1F	49830.8	34678.5	325002	3.22834
P49641	MAN2A2	Alpha-mannosidase 2x	130539	941.141	17958.6	4.25412
P49642	PRIM1	DNA primase small subunit	49902	10633.3	110871	3.38222
P49643	PRIM2	DNA primase large subunit	58806	24798.1	94522.2	1.93042
P49674	CSNK1E	Casein kinase I isoform epsilon	47315.1	7361.73	260679	5.14609
P49716	CEBPD	CCAAT/enhancer-binding protein delta	28467	1	12614.5	13.6228
P49720	PSMB3	Proteasome subunit beta type-3	22948.9	2324.95	55526.1	4.57789
P49721	PSMB2	Proteasome subunit beta type-2	22836.3	2228.92	47782.4	4.42206
P49736	MCM2	DNA replication licensing factor MCM2	101896	161447	380280	1.236
P49748	ACADVL	Very long-chain specific acyl-CoA dehydrogenase, mitochondrial	70390.1	102931	221817	1.10769
P49750	YLPM1	YLP motif-containing protein 1	219985	772.536	498460	9.33366
P49754	VPS41	Vacuolar protein sorting-associated protein 41 homolog	98566.1	1	6676.74	12.7049
P49755	TMED10	Transmembrane emp24 domain-containing protein 10	24976	131567	95701.1	-0.459189
P49756	RBM25	RNA-binding protein 25	100185	10185.3	1.56045e+06	7.25934
P49757	NUMB	Protein numb homolog	70803.8	15725	207673	3.72318
P49759	CLK1	Dual specificity protein kinase CLK1	57290.6	4296.54	22052	2.35966
P49760	CLK2	Dual specificity protein kinase CLK2	60090.2	1	192296	17.553
P49761	CLK3	Dual specificity protein kinase CLK3	73515	1	520812	18.9904
P49768	PSEN1	Presenilin-1	52667.8	1	63764	15.9605
P49770	EIF2B2	Translation initiation factor eIF-2B subunit beta	38989.6	36017	13601.8	-1.40488
P49790	NUP153	Nuclear pore complex protein Nup153	153938	98304.2	283212	1.52656
P49792	RANBP2	E3 SUMO-protein ligase RanBP2	358199	25733.1	264681	3.36256
P49796	RGS3	Regulator of G-protein signaling 3	132336	2095.96	20641	3.29983
P49815	TSC2	Tuberin	200608	1602.84	139329	6.44172
P49821	NDUFV1	NADH dehydrogenase [ubiquinone] flavoprotein 1, mitochondrial	50817.1	18048.2	112356	2.63815
P49840	GSK3A	Glycogen synthase kinase-3 alpha	50980.8	10867	23055.6	1.08516
P49841	GSK3B	Glycogen synthase kinase-3 beta	46744.3	13450.9	51282.2	1.93076
P49848	TAF6	Transcription initiation factor TFIID subunit 6	72668.4	2750.52	19361.8	2.81544
P49902	NT5C2	Cytosolic purine 5'-nucleotidase	64969.8	6935.51	27256.6	1.97453
P49915	GMPS	GMP synthase [glutamine-hydrolyzing]	76715.4	534523	677272	0.341484
P49916	LIG3	DNA ligase 3	112907	6945.74	56464.7	3.02315
P49917	LIG4	DNA ligase 4	103971	5965.72	28903.8	2.27649
P49918	CDKN1C	Cyclin-dependent kinase inhibitor 1C	32177.5	1	23110.4	14.4963
P49959	MRE11	Double-strand break repair protein MRE11	80593.3	95457.1	167865	0.814377
P50135	HNMT	Histamine N-methyltransferase	33295.1	19336	17459.2	-0.1473
P50148	GNAQ	Guanine nucleotide-binding protein G(q) subunit alpha	42142.1	16061.3	9867.05	-0.702901
P50213	IDH3A	Isocitrate dehydrogenase [NAD] subunit alpha, mitochondrial	39591.7	54789.2	495877	3.17802
P50281	MMP14	Matrix metalloproteinase-14	65893.9	62829.2	230594	1.87585
P50336	PPOX	Protoporphyrinogen oxidase	50765.3	2038.28	6369.34	1.64379
P50395	GDI2	Rab GDP dissociation inhibitor beta	50663.2	205929	166607	-0.305704
P50402	EMD	Emerin	28993.8	16674	401781	4.59074
P50416	CPT1A	Carnitine O-palmitoyltransferase 1, liver isoform	88367.6	11459.4	165158	3.84924
P50443	SLC26A2	Sulfate transporter	81661.5	2420.31	12977.7	2.42277
P50452	SERPINB8	Serpin B8	42766.9	509529	102930	-2.30751
P50453	SERPINB9	Serpin B9	42403.6	439193	282020	-0.63906
P50454	SERPINH1	Serpin H1	46440.5	817484	1.99248e+06	1.2853
P50479	PDLIM4	PDZ and LIM domain protein 4	35398	70747.1	1.63955e+06	4.53448
P50502;Q8IZP2	ST13;ST13P4	Hsc70-interacting protein;Putative protein FAM10A4	41331.69;27406.76	32333.7	35159.5	0.120876
P50542	PEX5	Peroxisomal targeting signal 1 receptor	70864.8	8093.46	267197	5.045
P50548	ERF	ETS domain-containing transcription factor ERF	58703	18682.1	1.42555e+06	6.25372
P50549	ETV1	ETS translocation variant 1	55130.8	1	21225.2	14.3735
P50552	VASP	Vasodilator-stimulated phosphoprotein	39829.7	15801	105945	2.74523
P50570	DNM2	Dynamin-2	98064.3	293316	1.03889e+06	1.82451
P50579	METAP2	Methionine aminopeptidase 2	52891.6	52263.7	195677	1.90459
P50583	NUDT2	Bis(5'-nucleosyl)-tetraphosphatase [asymmetrical]	16829.2	13496.5	43451	1.6868
P50591	TNFSF10	Tumor necrosis factor ligand superfamily member 10	32508.9	1976.05	6246.52	1.66044
P50613	CDK7	Cyclin-dependent kinase 7	39038.4	55464.1	43877.5	-0.338074
P50750	CDK9	Cyclin-dependent kinase 9	42777.5	3186.54	355113	6.80014
P50851	LRBA	Lipopolysaccharide-responsive and beige-like anchor protein	319108	15149.1	37879	1.32217
P50897	PPT1	Palmitoyl-protein thioesterase 1	34193.5	4137.35	16902.9	2.03049
P50914	RPL14	60S ribosomal protein L14	23431.8	31629.9	1.66775e+06	5.72047
P50990	CCT8	T-complex protein 1 subunit theta	59620.6	633875	716044	0.175848
P50991	CCT4	T-complex protein 1 subunit delta	57924.2	1.28876e+06	4.48428e+06	1.79889
P50995	ANXA11	Annexin A11	54389.7	41937.7	127089	1.59952
P51003	PAPOLA	Poly(A) polymerase alpha	82842.6	10277.5	43988.5	2.09763
P51114	FXR1	Fragile X mental retardation syndrome-related protein 1	69720.8	35096.3	376569	3.42352
P51116	FXR2	Fragile X mental retardation syndrome-related protein 2	74223.3	65930.4	597579	3.18011
P51148	RAB5C	Ras-related protein Rab-5C	23482.5	45487.9	58571.9	0.364724
P51151	RAB9A	Ras-related protein Rab-9A	22837.6	32073.1	56077.9	0.806068
P51153	RAB13	Ras-related protein Rab-13	22774.1	27824	97494.9	1.809
P51157	RAB28	Ras-related protein Rab-28	24841.3	3989.76	13226.2	1.72902
P51159	RAB27A	Ras-related protein Rab-27A	24868.1	15324.2	61768.8	2.01107
P51178	PLCD1	1-phosphatidylinositol 4,5-bisphosphate phosphodiesterase delta-1	85665	11816.3	23747.2	1.00698
P51398	DAP3	28S ribosomal protein S29, mitochondrial	45566.4	173367	534311	1.62385
P51452	DUSP3	Dual specificity protein phosphatase 3	20478.3	69963.4	54612.3	-0.357374
P51532	SMARCA4	Transcription activator BRG1	184646	1	79028	16.2701
P51553	IDH3G	Isocitrate dehydrogenase [NAD] subunit gamma, mitochondrial	42794.3	223398	52709.9	-2.08347
P51570	GALK1	Galactokinase	42272.2	176942	611222	1.78842
P51571	SSR4	Translocon-associated protein subunit delta	18998.6	83818	1.63525e+06	4.28611
P51572	BCAP31	B-cell receptor-associated protein 31	27991.6	39220.1	70802.7	0.852212
P51608	MECP2	Methyl-CpG-binding protein 2	52440.6	1	28049.8	14.7757
P51610	HCFC1	Host cell factor 1	208732	36921.9	155991	2.07891
P51648	ALDH3A2	Fatty aldehyde dehydrogenase	54847.8	5228.92	26960.6	2.36627
P51659	HSD17B4	Peroxisomal multifunctional enzyme type 2	79686.4	42663.7	105192	1.30194
P51665	PSMD7	26S proteasome non-ATPase regulatory subunit 7	37025.4	111754	154301	0.465419
P51692	STAT5B	Signal transducer and activator of transcription 5B	89865.9	38389	183893	2.2601
P51784	USP11	Ubiquitin carboxyl-terminal hydrolase 11	109817	9205.52	175514	4.25295
P51790	CLCN3	H(+)/Cl(-) exchange transporter 3	90966.2	2526.72	56886	4.49273
P51798	CLCN7	H(+)/Cl(-) exchange transporter 7	88679.1	14416.1	1	-13.8154
P51809	VAMP7	Vesicle-associated membrane protein 7	24935.1	2187.9	8559.28	1.96794
P51812	RPS6KA3	Ribosomal protein S6 kinase alpha-3	83736	131714	766747	2.54134
P51858	HDGF	Hepatoma-derived growth factor	26788.3	35574.1	57389.1	0.68995
P51946	CCNH	Cyclin-H	37643.4	12935.5	35613.2	1.46108
P51948	MNAT1	CDK-activating kinase assembly factor MAT1	35822.9	25196.1	35877.5	0.509876
P51965;Q969T4;Q96LR5	UBE2E1;UBE2E3;UBE2E2	Ubiquitin-conjugating enzyme E2 E1;Ubiquitin-conjugating enzyme E2 E3;Ubiquitin-conjugating enzyme E2 E2	21404.17;22912.61;22255.09	1	38080.4	15.2168
P51970	NDUFA8	NADH dehydrogenase [ubiquinone] 1 alpha subcomplex subunit 8	20105	17743.9	144520	3.02588
P51991	HNRNPA3	Heterogeneous nuclear ribonucleoprotein A3	39594.9	160813	408303	1.34426
P52179	MYOM1	Myomesin-1	187627	73043.9	86359.6	0.241594
P52209	PGD	6-phosphogluconate dehydrogenase, decarboxylating	53140	46526.7	143183	1.62173
P52272	HNRNPM	Heterogeneous nuclear ribonucleoprotein M	77515.5	242538	1.76578e+06	2.86402
P52292	KPNA2	Importin subunit alpha-1	57861.9	223876	955142	2.09302
P52294	KPNA1	Importin subunit alpha-5	60221.8	39295.5	130733	1.73419
P52298	NCBP2	Nuclear cap-binding protein subunit 2	18001.1	1	106637	16.7024
P52306	RAP1GDS1	Rap1 GTPase-GDP dissociation stimulator 1	66316.8	17926.2	304993	4.08863
P52429	DGKE	Diacylglycerol kinase epsilon	63927.1	1	30793.8	14.9104
P52434	POLR2H	DNA-directed RNA polymerases I, II, and III subunit RPABC3	17143.3	98984.8	144264	0.543433
P52435	POLR2J	DNA-directed RNA polymerase II subunit RPB11-a	13293.3	7981.43	181382	4.50624
P52565	ARHGDIA	Rho GDP-dissociation inhibitor 1	23207.1	164059	107053	-0.615894
P52594	AGFG1	Arf-GAP domain and FG repeat-containing protein 1	58260.2	46673.2	20699	-1.17304
P52597	HNRNPF	Heterogeneous nuclear ribonucleoprotein F	45671.8	381598	1.14221e+06	1.5817
P52630	STAT2	Signal transducer and activator of transcription 2	97916.2	9537.93	104712	3.4566
P52701	MSH6	DNA mismatch repair protein Msh6	152786	17253.8	567534	5.03972
P52732	KIF11	Kinesin-like protein KIF11	119159	49219.9	195390	1.98904
P52735	VAV2	Guanine nucleotide exchange factor VAV2	101289	33551.9	110110	1.71447
P52738	ZNF140	Zinc finger protein 140	52996.1	26103.2	54893.6	1.07241
P52756	RBM5	RNA-binding protein 5	92153.8	2327.57	50561.4	4.44114
P52788	SMS	Spermine synthase	41268.2	23197.2	64835	1.48282
P52789	HK2	Hexokinase-2	102380	82982.1	370024	2.15675
P52815	MRPL12	39S ribosomal protein L12, mitochondrial	21348.2	17679.6	123302	2.80204
P52823	STC1	Stanniocalcin-1	27621.4	2147.97	7742.2	1.84977
P52824	DGKQ	Diacylglycerol kinase theta	101155	1	5222.92	12.3506
P52888	THOP1	Thimet oligopeptidase	78839.8	24200.9	86938.4	1.84494
P52907	CAPZA1	F-actin-capping protein subunit alpha-1	32922.8	159847	522050	1.7075
P52948	NUP98	Nuclear pore complex protein Nup98-Nup96	197579	50333.3	93839.3	0.898678
P53004	BLVRA	Biliverdin reductase A	33428.5	15191.9	44898.2	1.56336
P53007	SLC25A1	Tricarboxylate transport protein, mitochondrial	34012.7	311.083	75504.4	7.92312
P53041	PPP5C	Serine/threonine-protein phosphatase 5	56878.6	62915.1	37796.4	-0.735157
P53350	PLK1	Serine/threonine-protein kinase PLK1	68254.8	1751.87	54880.8	4.96934
P53365	ARFIP2	Arfaptin-2	37855.7	25344.2	7154.04	-1.82482
P53367	ARFIP1	Arfaptin-1	41738.3	57939.8	59450.8	0.0371424
P53370	NUDT6	Nucleoside diphosphate-linked moiety X motif 6	35678.7	5275.28	9113.69	0.788789
P53384	NUBP1	Cytosolic Fe-S cluster assembly factor NUBP1	34534.5	30586	78525.3	1.36029
P53396	ACLY	ATP-citrate synthase	120839	204398	410644	1.00651
P53597	SUCLG1	Succinate--CoA ligase [ADP/GDP-forming] subunit alpha, mitochondrial	36249.7	49293.3	98932.4	1.00505
P53602	MVD	Diphosphomevalonate decarboxylase	43404.6	18022.7	1	-14.1375
P53609	PGGT1B	Geranylgeranyl transferase type-1 subunit beta	42368.2	6534	1	-12.6738
P53611	RABGGTB	Geranylgeranyl transferase type-2 subunit beta	36924.4	22283.7	72629.6	1.70457
P53618	COPB1	Coatomer subunit beta	107142	82634.1	533151	2.68973
P53621	COPA	Coatomer subunit alpha	138346	157841	1.087e+06	2.78382
P53667	LIMK1	LIM domain kinase 1	72585	16521.8	57425.1	1.79731
P53677	AP3M2	AP-3 complex subunit mu-2	46977.3	8091.21	90767.6	3.48775
P53680	AP2S1	AP-2 complex subunit sigma	17017.7	339638	4.45084e+06	3.71201
P53701	HCCS	Cytochrome c-type heme lyase	30601.6	10587.4	16615.3	0.650174
P53794	SLC5A3	Sodium/myo-inositol cotransporter	79693.9	5379.93	99487.4	4.20885
P53801	PTTG1IP	Pituitary tumor-transforming gene 1 protein-interacting protein	20323.7	18396.7	178853	3.28126
P53803	POLR2K	DNA-directed RNA polymerases I, II, and III subunit RPABC4	7004.19	1	131088	17.0002
P53814	SMTN	Smoothelin	99058.7	14539.3	256860	4.14296
P53990	IST1	IST1 homolog	39750.5	17434.7	31394.8	0.848561
P53992	SEC24C	Protein transport protein Sec24C	118325	99495.4	278412	1.48452
P53999	SUB1	Activated RNA polymerase II transcriptional coactivator p15	14395.3	532770	1.65823e+06	1.63806
P54098	POLG	DNA polymerase subunit gamma-1	139562	303.919	6112.38	4.32998
P54105	CLNS1A	Methylosome subunit pICln	26215.3	320989	1.08659e+06	1.75921
P54136	RARS	Arginine--tRNA ligase, cytoplasmic	75379	391553	695035	0.827878
P54252	ATXN3	Ataxin-3	41250	13489.3	8767.59	-0.621567
P54253	ATXN1	Ataxin-1	86922.7	4231.55	373776	6.46484
P54259	ATN1	Atrophin-1	125414	37289.3	617625	4.0499
P54277	PMS1	PMS1 protein homolog 1	105830	70174.2	186457	1.40983
P54278	PMS2	Mismatch repair endonuclease PMS2	95796.6	4610.52	27813.5	2.59278
P54577	YARS	Tyrosine--tRNA ligase, cytoplasmic	59143.5	589655	1.37547e+06	1.22198
P54578	USP14	Ubiquitin carboxyl-terminal hydrolase 14	56069.1	397358	439445	0.145243
P54619	PRKAG1	5'-AMP-activated protein kinase subunit gamma-1	37579.4	18196.4	140100	2.94473
P54652	HSPA2	Heat shock-related 70 kDa protein 2	70021	3.23345e+06	5.54327e+06	0.777665
P54687	BCAT1	Branched-chain-amino-acid aminotransferase, cytosolic	42966.2	115088	3846.67	-4.90299
P54709	ATP1B3	Sodium/potassium-transporting ATPase subunit beta-3	31512.6	58754.4	105856	0.849338
P54725	RAD23A	UV excision repair protein RAD23 homolog A	39609.2	1861.76	1598.11	-0.220307
P54727	RAD23B	UV excision repair protein RAD23 homolog B	43171.2	29329.7	41449.6	0.498997
P54760	EPHB4	Ephrin type-B receptor 4	108270	6267.24	12078	0.946478
P54802	NAGLU	Alpha-N-acetylglucosaminidase	82265.7	3078.92	23708.9	2.94493
P54803	GALC	Galactocerebrosidase	77063.5	14232.8	61631.1	2.11444
P54819	AK2	Adenylate kinase 2, mitochondrial	26477.7	134882	73544.6	-0.87501
P54886	ALDH18A1	Delta-1-pyrroline-5-carboxylate synthase	87302.3	108728	567542	2.384
P54920	NAPA	Alpha-soluble NSF attachment protein	33232.7	53175.5	171359	1.68819
P55010	EIF5	Eukaryotic translation initiation factor 5	49222.7	17189.6	131275	2.93298
P55011	SLC12A2	Solute carrier family 12 member 2	131447	7349.71	28004	1.92987
P55036	PSMD4	26S proteasome non-ATPase regulatory subunit 4	40736.7	78407.2	135397	0.78814
P55039	DRG2	Developmentally-regulated GTP-binding protein 2	40746.4	262752	76545.8	-1.77931
P55055;Q13133	NR1H2;NR1H3	Oxysterols receptor LXR-beta;Oxysterols receptor LXR-alpha	50973.8;50395.82	1	4263.7	12.0579
P55060	CSE1L	Exportin-2	110417	103702	1.08005e+06	3.38058
P55072	VCP	Transitional endoplasmic reticulum ATPase	89321.8	210270	478459	1.18615
P55081	MFAP1	Microfibrillar-associated protein 1	51958.4	69406.5	423874	2.61049
P55084	HADHB	Trifunctional enzyme subunit beta, mitochondrial	51294.4	38070.5	951584	4.64359
P55196	AFDN	Afadin	206804	20529.9	188639	3.19983
P55198	MLLT6	Protein AF-17	112076	1	39949.6	15.2859
P55199	ELL	RNA polymerase II elongation factor ELL	68264.7	1295.8	27230.1	4.39329
P55209	NAP1L1	Nucleosome assembly protein 1-like 1	45374.2	776727	2.22912e+06	1.521
P55210	CASP7	Caspase-7	34276.8	44186.7	70818.5	0.680515
P55212	CASP6	Caspase-6	33310	63249.8	42926.7	-0.559185
P55263	ADK	Adenosine kinase	40545.4	60534.7	22420.1	-1.43297
P55265	ADAR	Double-stranded RNA-specific adenosine deaminase	136066	23390.1	96541.8	2.04526
P55268	LAMB2	Laminin subunit beta-2	195981	8188.67	19398.3	1.24423
P55283	CDH4	Cadherin-4	100281	3550.96	13321.2	1.90744
P55345	PRMT2	Protein arginine N-methyltransferase 2	49041.7	9989.5	29923.2	1.58278
P55735	SEC13	Protein SEC13 homolog	35540.5	365976	182775	-1.00168
P55769	SNU13	NHP2-like protein 1	14173.5	9363.14	60984.5	2.70338
P55786	NPEPPS	Puromycin-sensitive aminopeptidase	103276	268275	649242	1.27505
P55795	HNRNPH2	Heterogeneous nuclear ribonucleoprotein H2	49263.6	38754.2	197687	2.35079
P55809	OXCT1	Succinyl-CoA:3-ketoacid coenzyme A transferase 1, mitochondrial	56157.6	4370.88	29759.4	2.76735
P55854;P61956;Q6EEV6	SUMO3;SUMO2;SUMO4	Small ubiquitin-related modifier 3;Small ubiquitin-related modifier 2;Small ubiquitin-related modifier 4	11637.04;10871.22;10685.13	10499.8	64464.9	2.61816
P55884	EIF3B	Eukaryotic translation initiation factor 3 subunit B	92481.6	117486	856416	2.86582
P55957	BID	BH3-interacting domain death agonist	21994.7	1	20690.9	14.3367
P56134	ATP5J2	ATP synthase subunit f, mitochondrial	10917.9	144029	179683	0.319098
P56182	RRP1	Ribosomal RNA processing protein 1 homolog A	52839.2	1	8975.31	13.1317
P56192	MARS	Methionine--tRNA ligase, cytoplasmic	101116	94197.3	338532	1.84554
P56282	POLE2	DNA polymerase epsilon subunit 2	59537.2	1	11953.4	13.5451
P56377	AP1S2	AP-1 complex subunit sigma-2	18614.7	1	51113.3	15.6414
P56378	MP68	6.8 kDa mitochondrial proteolipid	6662.04	1	22061.7	14.4293
P56381;Q5VTU8	ATP5E;ATP5EP2	ATP synthase subunit epsilon, mitochondrial;ATP synthase subunit epsilon-like protein, mitochondrial	5779.76;5806.87	21231.5	251050	3.56369
P56385	ATP5I	ATP synthase subunit e, mitochondrial	7933.21	27384	97843	1.83714
P56537	EIF6	Eukaryotic translation initiation factor 6	26599.1	85025.9	120224	0.499747
P56545	CTBP2	C-terminal-binding protein 2	48944.9	43891.2	39885	-0.138086
P56556	NDUFA6	NADH dehydrogenase [ubiquinone] 1 alpha subcomplex subunit 6	17870.8	4556.12	9802.59	1.10536
P56937	HSD17B7	3-keto-steroid reductase	38206.2	6788.86	23469.2	1.78953
P56945	BCAR1	Breast cancer anti-estrogen resistance protein 1	93371.9	33761	228466	2.75855
P56962	STX17	Syntaxin-17	33403.5	11640.5	89491.9	2.94261
P57058	HUNK	Hormonally up-regulated neu tumor-associated kinase	79685.5	13874.1	277058	4.31972
P57076	C21orf59	UPF0769 protein C21orf59	33224.2	1	38006.5	15.214
P57078	RIPK4	Receptor-interacting serine/threonine-protein kinase 4	91610.8	1	39792.9	15.2802
P57088	TMEM33	Transmembrane protein 33	27978.2	7679.7	119036	3.95421
P57678	GEMIN4	Gem-associated protein 4	120037	3.30428e+06	4.27254e+06	0.370759
P57721	PCBP3	Poly(rC)-binding protein 3	39465.2	137005	117707	-0.21903
P57737	CORO7	Coronin-7	100605	20949	49342.2	1.23594
P57740	NUP107	Nuclear pore complex protein Nup107	106374	698899	183349	-1.93049
P57764	GSDMD	Gasdermin-D	52801	15678	240120	3.93694
P57772	EEFSEC	Selenocysteine-specific elongation factor	65304.7	21458.2	188568	3.13549
P57775	FBXW4	F-box/WD repeat-containing protein 4	46337	1	6843.19	12.7405
P58004	SESN2	Sestrin-2	54493.7	1	16211.2	13.9847
P58335	ANTXR2	Anthrax toxin receptor 2	53666.2	6829.65	40816.3	2.57926
P58546	MTPN	Myotrophin	12894.8	60898.3	110461	0.859057
P58557	YBEY	Endoribonuclease YbeY	19298.1	1	13216.2	13.69
P59998	ARPC4	Actin-related protein 2/3 complex subunit 4	19667	44558.5	68312.7	0.616455
P60174	TPI1	Triosephosphate isomerase	30791	44292.8	91236.9	1.04255
P60228	EIF3E	Eukaryotic translation initiation factor 3 subunit E	52220.8	306405	848730	1.46987
P60331;P60368;P60369;P60370;P60372;P60409;P60410;P60411;P60413	KRTAP10-1;KRTAP10-2;KRTAP10-3;KRTAP10-5;KRTAP10-4;KRTAP10-7;KRTAP10-8;KRTAP10-9;KRTAP10-12	Keratin-associated protein 10-1;Keratin-associated protein 10-2;Keratin-associated protein 10-3;Keratin-associated protein 10-5;Keratin-associated protein 10-4;Keratin-associated protein 10-7;Keratin-associated protein 10-8;Keratin-associated protein 10-9;Keratin-associated protein 10-12	28660.41;25615.7;22348.2;27626.26;40429.03;37815.89;26298.7;30036.89;25107.43	1	182357	17.4764
P60468	SEC61B	Protein transport protein Sec61 subunit beta	9974.45	156404	143882	-0.120386
P60510	PPP4C	Serine/threonine-protein phosphatase 4 catalytic subunit	35079.9	41902.1	95593	1.18988
P60660	MYL6	Myosin light polypeptide 6	16930	564030	3.20372e+06	2.50591
P60709	ACTB	Actin, cytoplasmic 1	41736.7	1.97345e+07	65003928	1.7198
P60842	EIF4A1	Eukaryotic initiation factor 4A-I	46153.9	771184	1.8357e+06	1.25118
P60866	RPS20	40S ribosomal protein S20	13372.7	532938	6.21976e+06	3.54482
P60891	PRPS1	Ribose-phosphate pyrophosphokinase 1	34834.2	69005.7	472015	2.77405
P60900	PSMA6	Proteasome subunit alpha type-6	27399.5	51682.4	383038	2.88974
P60903	S100A10	Protein S100-A10	11203.1	143816	96393.6	-0.577216
P60953	CDC42	Cell division control protein 42 homolog	21258.6	1644.54	9552.55	2.5382
P60981	DSTN	Destrin	18505.7	358051	162116	-1.14313
P60983	GMFB	Glia maturation factor beta	16713.2	9729.02	20239	1.05677
P61006	RAB8A	Ras-related protein Rab-8A	23668.2	11276.5	29379	1.38146
P61009	SPCS3	Signal peptidase complex subunit 3	20313.4	16083.6	55840.6	1.79573
P61011	SRP54	Signal recognition particle 54 kDa protein	55704.7	22547	473606	4.39268
P61019	RAB2A	Ras-related protein Rab-2A	23545.5	8339.14	36893.5	2.1454
P61020	RAB5B	Ras-related protein Rab-5B	23706.8	1	39570.1	15.2721
P61026	RAB10	Ras-related protein Rab-10	22540.9	4687.31	10930.4	1.22151
P61077;P62837	UBE2D3;UBE2D2	Ubiquitin-conjugating enzyme E2 D3;Ubiquitin-conjugating enzyme E2 D2	16687.16;16735.25	88399.7	284615	1.6869
P61081	UBE2M	NEDD8-conjugating enzyme Ubc12	20900	108765	75962.2	-0.517855
P61086	UBE2K	Ubiquitin-conjugating enzyme E2 K	22406.7	200276	90636.9	-1.14382
P61088	UBE2N	Ubiquitin-conjugating enzyme E2 N	17137.8	292884	79402	-1.88308
P61106	RAB14	Ras-related protein Rab-14	23896.9	10731.5	80821.8	2.91289
P61129	ZC3H6	Zinc finger CCCH domain-containing protein 6	131670	1	36339.4	15.1492
P61158	ACTR3	Actin-related protein 3	47371.2	26124	112661	2.10854
P61160	ACTR2	Actin-related protein 2	44760.8	41515.7	21855.2	-0.925678
P61163	ACTR1A	Alpha-centractin	42613.7	161239	63409.7	-1.34643
P61201	COPS2	COP9 signalosome complex subunit 2	51596.7	34490.1	253852	2.87974
P61204	ARF3	ADP-ribosylation factor 3	20600.8	295991	849918	1.52177
P61218	POLR2F	DNA-directed RNA polymerases I, II, and III subunit RPABC2	14478.1	1	42864.4	15.3875
P61221	ABCE1	ATP-binding cassette sub-family E member 1	67314.3	126587	514191	2.02217
P61247	RPS3A	40S ribosomal protein S3a	29944.9	110874	2.94729e+06	4.73239
P61254	RPL26	60S ribosomal protein L26	17258.2	27671.7	1.11431e+06	5.33159
P61289	PSME3	Proteasome activator complex subunit 3	29506	42206.9	54751	0.375406
P61313	RPL15	60S ribosomal protein L15	24146.1	54097.6	1.60226e+06	4.8884
P61326	MAGOH	Protein mago nashi homolog	17163.6	1	1.44527e+06	20.4629
P61353	RPL27	60S ribosomal protein L27	15797.7	114535	6.41899e+06	5.80848
P61421	ATP6V0D1	V-type proton ATPase subunit d 1	40329.1	69246.6	242179	1.80626
P61513	RPL37A	60S ribosomal protein L37a	10275.2	1720.86	31530.6	4.19555
P61599	NAA20	N-alpha-acetyltransferase 20	20368.2	3935.64	15134.3	1.94316
P61619	SEC61A1	Protein transport protein Sec61 subunit alpha isoform 1	52264.7	119626	328082	1.45552
P61626	LYZ	Lysozyme C	16537	27742.9	129257	2.22006
P61758	VBP1	Prefoldin subunit 3	22658	4845.18	9835.12	1.02139
P61764	STXBP1	Syntaxin-binding protein 1	67568.7	130239	241786	0.892562
P61769	B2M	Beta-2-microglobulin	13714.6	19090.6	1	-14.2206
P61803	DAD1	Dolichyl-diphosphooligosaccharide--protein glycosyltransferase subunit DAD1	12496.7	15812.6	19446.8	0.298461
P61812	TGFB2	Transforming growth factor beta-2	47747.8	11217.8	87486.2	2.96326
P61923	COPZ1	Coatomer subunit zeta-1	20198.2	106484	99592.8	-0.0965266
P61927	RPL37	60S ribosomal protein L37	11077.9	1	75671.3	16.2075
P61962	DCAF7	DDB1- and CUL4-associated factor 7	38926.2	13326.3	451756	5.0832
P61964	WDR5	WD repeat-containing protein 5	36588.5	24261.6	270909	3.48106
P61970	NUTF2	Nuclear transport factor 2	14478.5	65437.4	37854.6	-0.789648
P61978	HNRNPK	Heterogeneous nuclear ribonucleoprotein K	50976.2	1.37588e+06	6.39007e+06	2.21547
P61981	YWHAG	14-3-3 protein gamma	28302.6	97194.6	149305	0.619313
P62068	USP46	Ubiquitin carboxyl-terminal hydrolase 46	42442.4	10661.1	13373.1	0.326978
P62070	RRAS2	Ras-related protein R-Ras2	23399.6	133687	227773	0.768742
P62072	TIMM10	Mitochondrial import inner membrane translocase subunit Tim10	10333	4880.67	7609.27	0.640678
P62081	RPS7	40S ribosomal protein S7	22126.8	282473	5.14478e+06	4.18693
P62136	PPP1CA	Serine/threonine-protein phosphatase PP1-alpha catalytic subunit	37512.1	39225.3	357225	3.18698
P62140	PPP1CB	Serine/threonine-protein phosphatase PP1-beta catalytic subunit	37186.8	26775.5	204537	2.93338
P62191	PSMC1	26S proteasome regulatory subunit 4	49184.5	1.17358e+06	2.03729e+06	0.795731
P62195	PSMC5	26S proteasome regulatory subunit 8	45626	243254	237857	-0.0323667
P62241	RPS8	40S ribosomal protein S8	24205.2	87303.6	4.53992e+06	5.70048
P62244	RPS15A	40S ribosomal protein S15a	14839.5	155401	3.10845e+06	4.32213
P62249	RPS16	40S ribosomal protein S16	16445.3	98406.8	2.58128e+06	4.71319
P62256	UBE2H	Ubiquitin-conjugating enzyme E2 H	20655.2	1	19504.3	14.2515
P62258	YWHAE	14-3-3 protein epsilon	29173.9	263399	1.07235e+06	2.02545
P62263	RPS14	40S ribosomal protein S14	16272.7	448804	7.20845e+06	4.00553
P62266	RPS23	40S ribosomal protein S23	15807.5	40516.4	2.31511e+06	5.83643
P62269	RPS18	40S ribosomal protein S18	17718.7	247940	1.03322e+07	5.38101
P62273	RPS29	40S ribosomal protein S29	6676.76	42594.4	715388	4.06999
P62277	RPS13	40S ribosomal protein S13	17222.3	125766	2.88638e+06	4.52045
P62280	RPS11	40S ribosomal protein S11	18430.7	37931.3	1.58484e+06	5.3848
P62304	SNRPE	Small nuclear ribonucleoprotein E	10803.6	1637.93	21067.6	3.68508
P62306	SNRPF	Small nuclear ribonucleoprotein F	9725.19	138835	235083	0.759801
P62310	LSM3	U6 snRNA-associated Sm-like protein LSm3	11845.4	54397.2	163655	1.58906
P62312	LSM6	U6 snRNA-associated Sm-like protein LSm6	9127.57	14427.2	77589	2.42706
P62314	SNRPD1	Small nuclear ribonucleoprotein Sm D1	13281.6	12410.6	92456.5	2.8972
P62316	SNRPD2	Small nuclear ribonucleoprotein Sm D2	13526.9	145414	5.5527e+06	5.25496
P62318	SNRPD3	Small nuclear ribonucleoprotein Sm D3	13916.2	818354	1.31591e+07	4.00719
P62330	ARF6	ADP-ribosylation factor 6	20082.2	165653	109640	-0.595392
P62333	PSMC6	26S proteasome regulatory subunit 10B	44173	447313	304214	-0.556198
P62424	RPL7A	60S ribosomal protein L7a	29995.6	16348.8	1.97959e+06	6.91987
P62487	POLR2G	DNA-directed RNA polymerase II subunit RPB7	19294.3	10209.3	191365	4.22837
P62491;Q15907	RAB11A;RAB11B	Ras-related protein Rab-11A;Ras-related protein Rab-11B	24393.52;24488.5	50913.1	40586.5	-0.327038
P62495	ETF1	Eukaryotic peptide chain release factor subunit 1	49030.9	74179.8	356078	2.26309
P62701	RPS4X	40S ribosomal protein S4, X isoform	29597.7	138195	3.89039e+06	4.81514
P62736;P63267	ACTA2;ACTG2	Actin, aortic smooth muscle;Actin, gamma-enteric smooth muscle	42008.95;41876.87	479702	772368	0.68715
P62750	RPL23A	60S ribosomal protein L23a	17695.1	21484.6	1.51107e+06	6.13612
P62753	RPS6	40S ribosomal protein S6	28680.6	51203.9	4.00408e+06	6.28907
P62805	HIST1H4A	Histone H4	11367.3	85744.9	2.42097e+06	4.81939
P62820	RAB1A	Ras-related protein Rab-1A	22677.8	1	17823.3	14.1215
P62826	RAN	GTP-binding nuclear protein Ran	24423.1	96401.2	333992	1.79269
P62829	RPL23	60S ribosomal protein L23	14865.4	101707	2.47386e+06	4.60427
P62841	RPS15	40S ribosomal protein S15	17040.1	4698.94	530134	6.81788
P62847	RPS24	40S ribosomal protein S24	15423.2	13792.2	438178	4.9896
P62851	RPS25	40S ribosomal protein S25	13742.1	148804	5.45271e+06	5.19549
P62854	RPS26	40S ribosomal protein S26	13015.4	46807.3	1.27729e+06	4.77021
P62857	RPS28	40S ribosomal protein S28	7841.02	443869	4.07791e+06	3.19962
P62861	FAU	40S ribosomal protein S30	6647.85	35282.6	635521	4.17091
[truncated: 3,827 more rows]
