# Supplementary material for: Reciprocal inhibition of PIN1 and APC/CCDH1 controls timely G1/S transition and creates therapeutic vulnerability
Source: Research Square preprint supplement (doi:10.21203/rs.3.rs-2447544/v1), 2023-01-19
Supplement: Supplementary file 3 [file f684a559159eea99d10267c2.docx]

**Fig. 1e**

**Fig. 1f**

**Fig. 3h**

**Fig. 3h**

**Fig. 4c Fig. 4d**

**Fig. 4j**

**Fig. 5a Fig. 5c**

**Fig. 5f**

**AApin1+Palbo AApin1+Palbo**

**Fig. 5g**
